# Supplementary material for: A regio- and stereoselective entry to (Z)-β-halo alkenyl sulfides and their applications to access stereodefined trisubstituted alkenes
Source: Royal Society of Chemistry journal article supplement (doi:10.1039/c4ob00103f), 2014-01-01

**Supporting Materials to**

**A regio- and stereoselective entry to (Z)- $\beta$ -halo alkenyl sulfides  
and their applications to the access of stereodefined  
trisubstituted alkenes**

**Ge Liu,<sup>†</sup> Lichun Kong,<sup>†</sup> Ji Shen, and Gangguo Zhu\***

*Department of Chemistry, Zhejiang Normal University, 688 Yingbin Road, Jinhua 321004,  
China*

Table of contents

NMR Spectra..... S1–S72

Selected studies on the stereochemistry of **3aa**, **3fa**, **5p**, **5u**, **6c**, **6h**, **6n** and **6p**....S73–S81

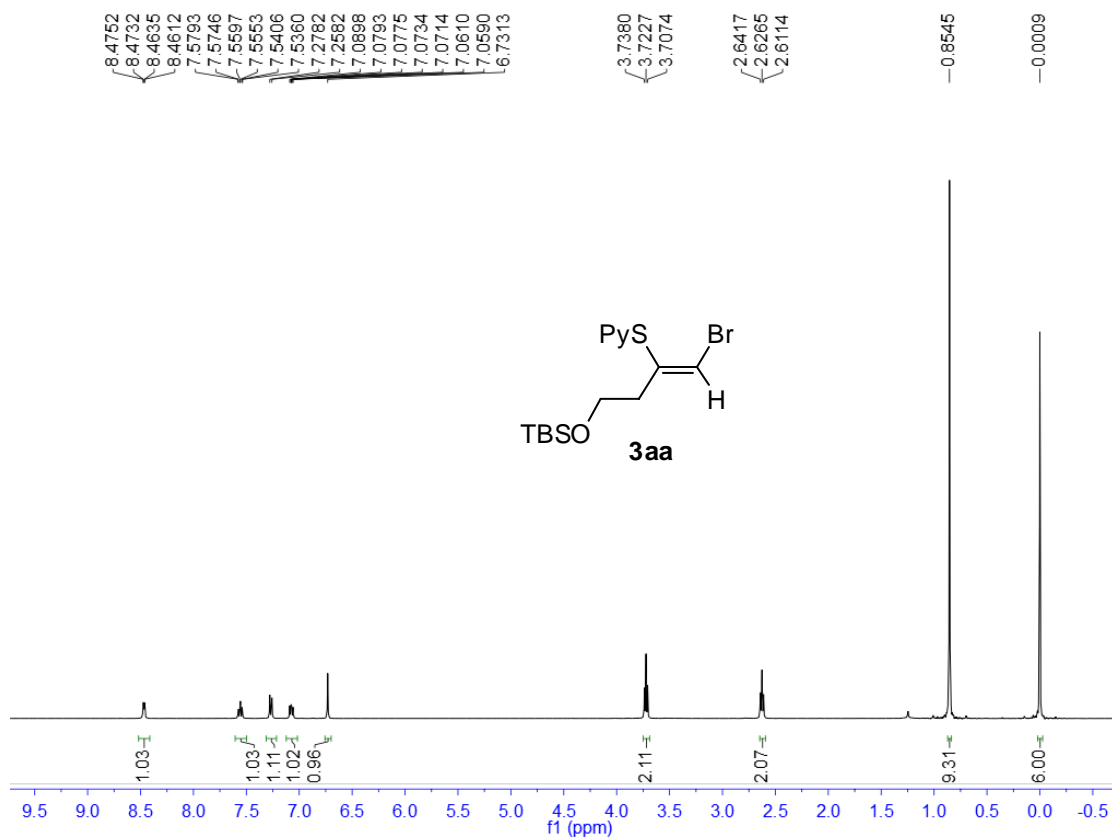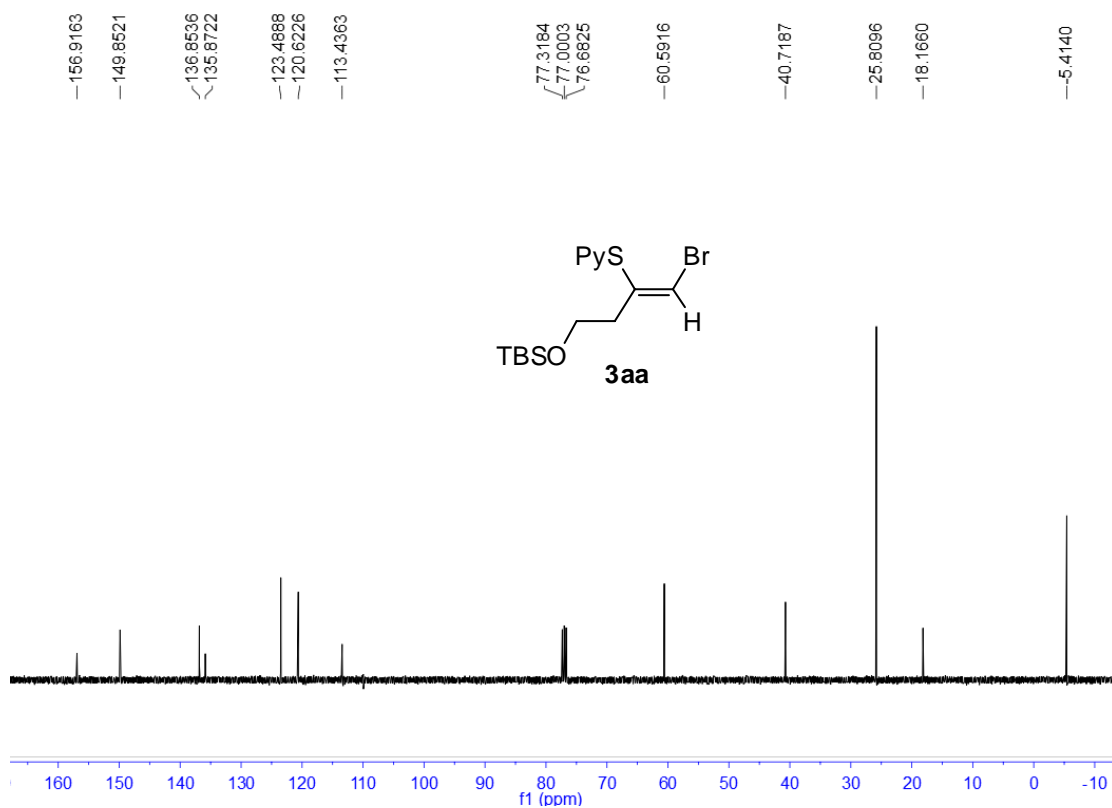

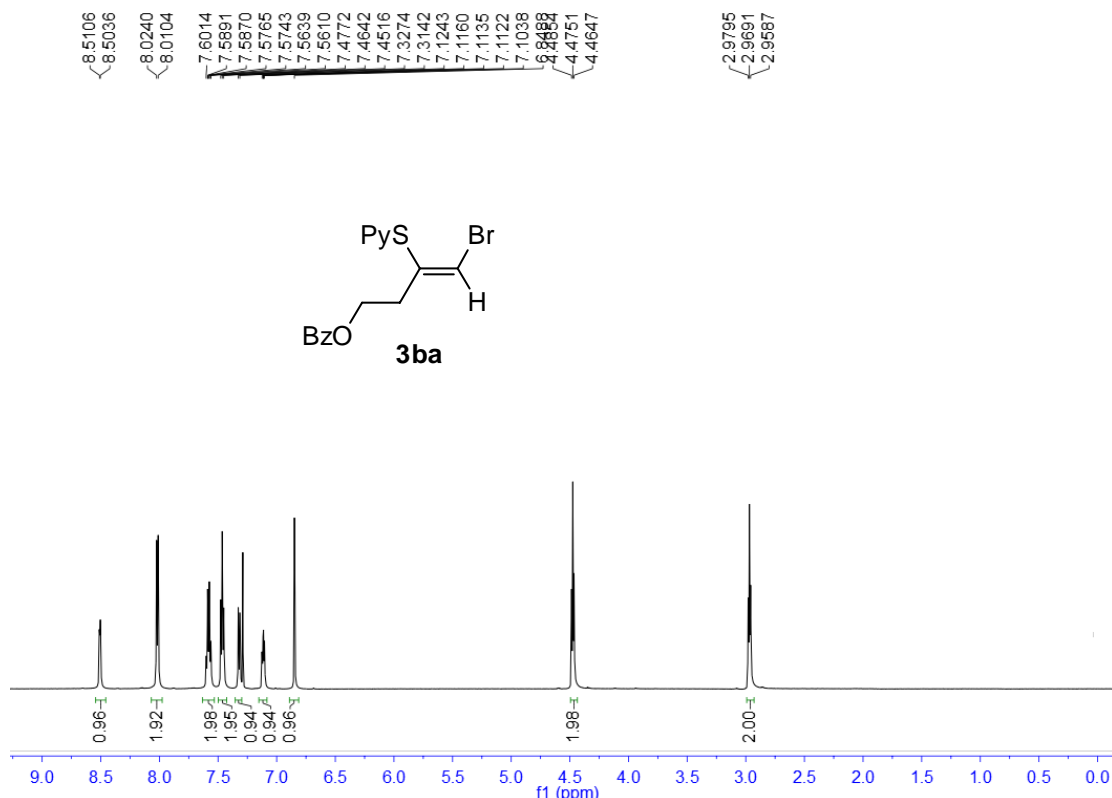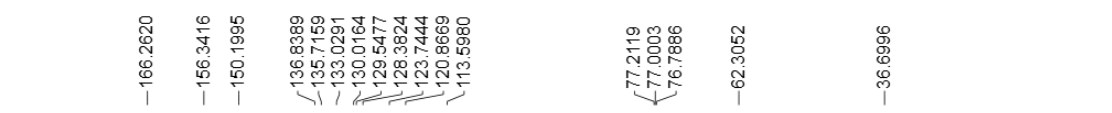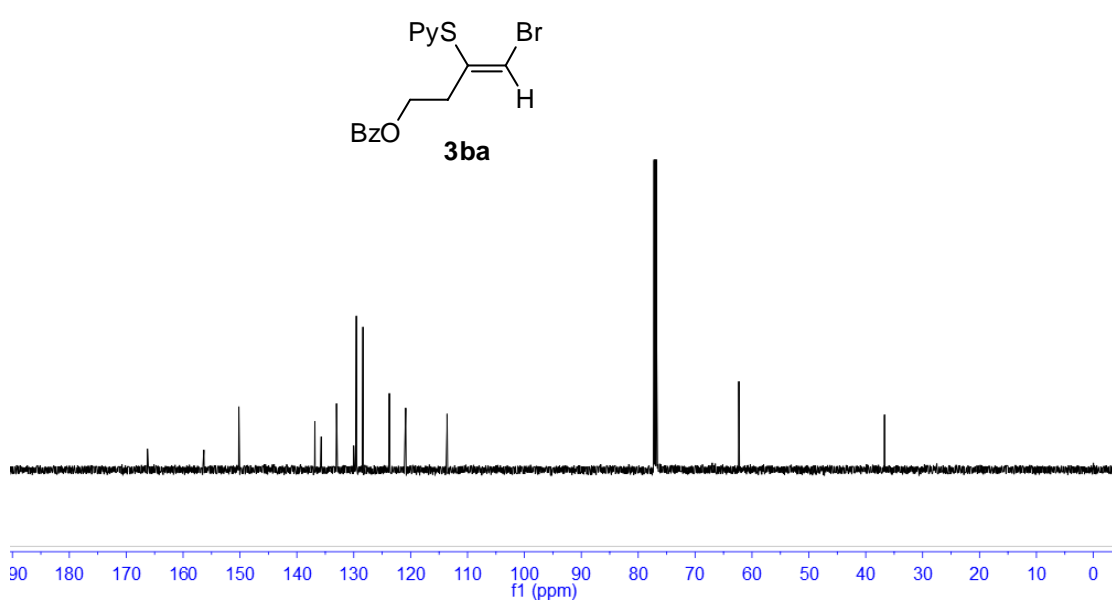

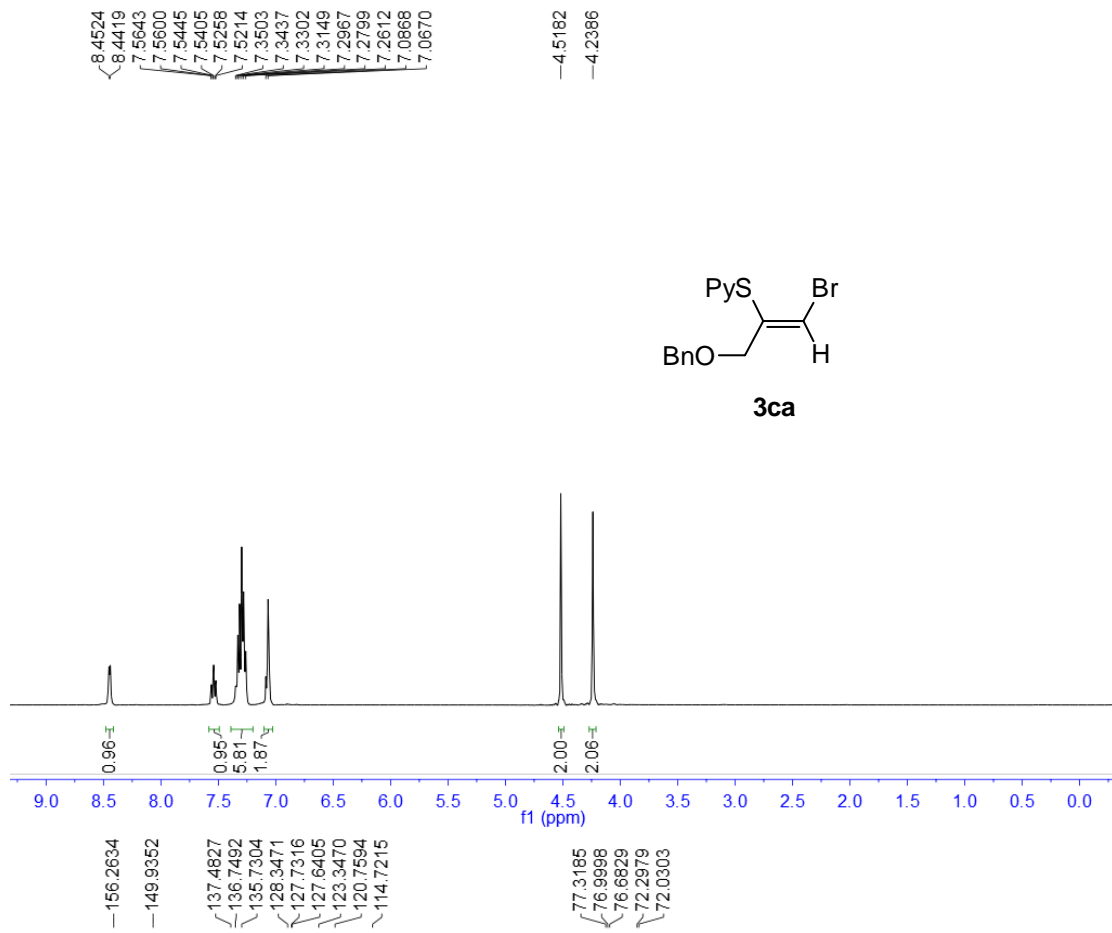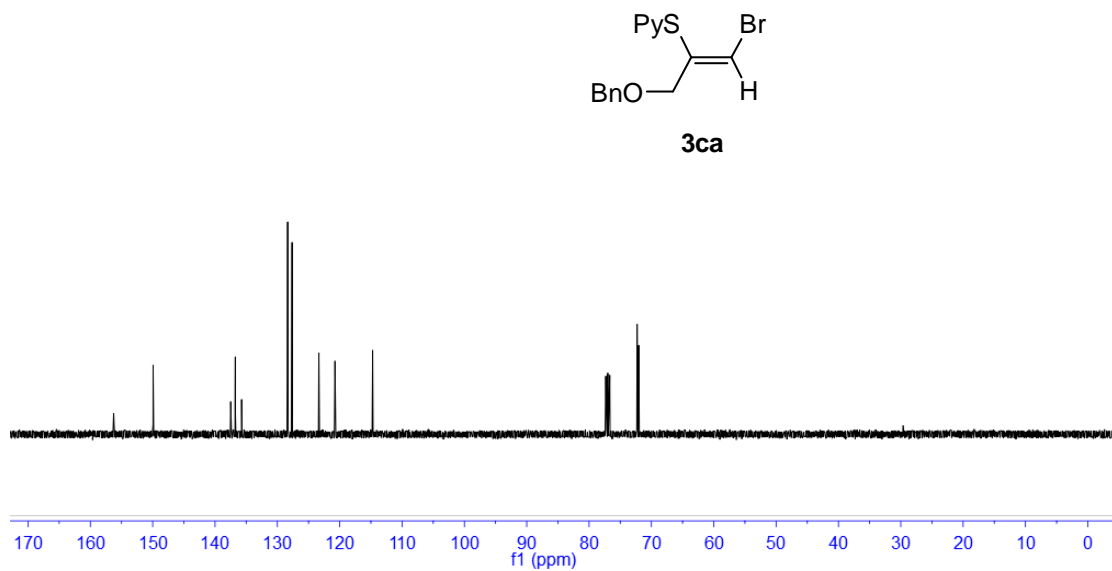

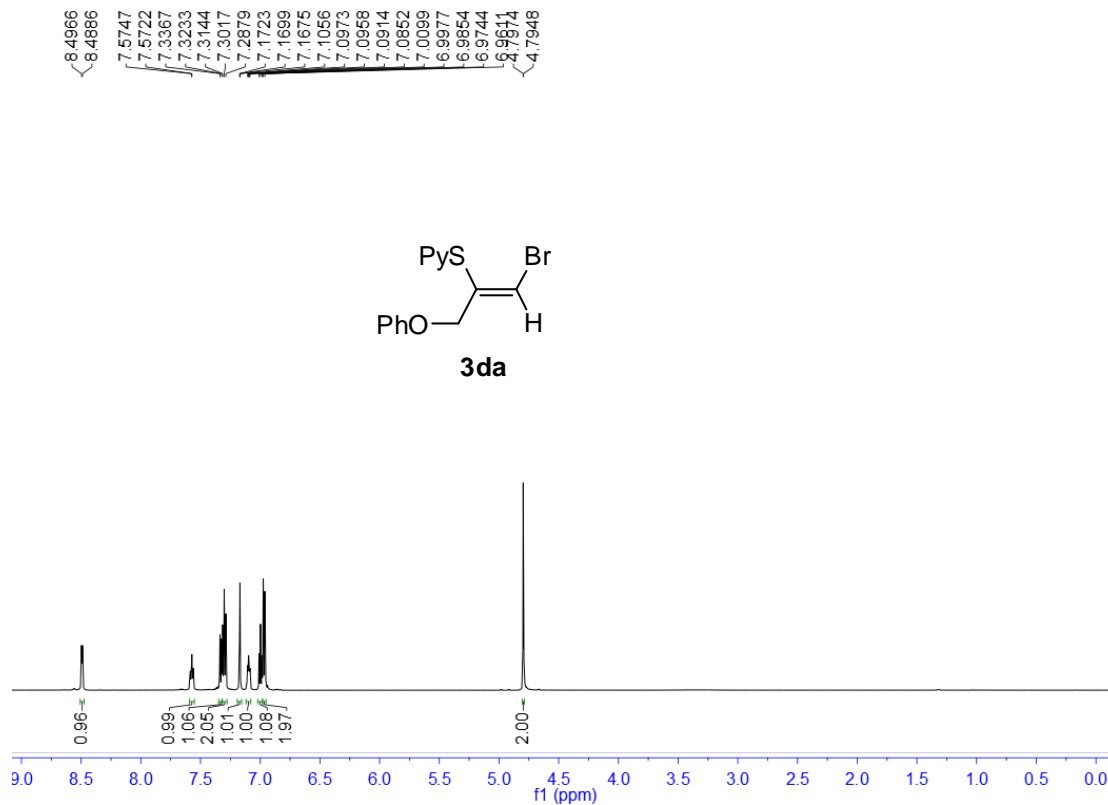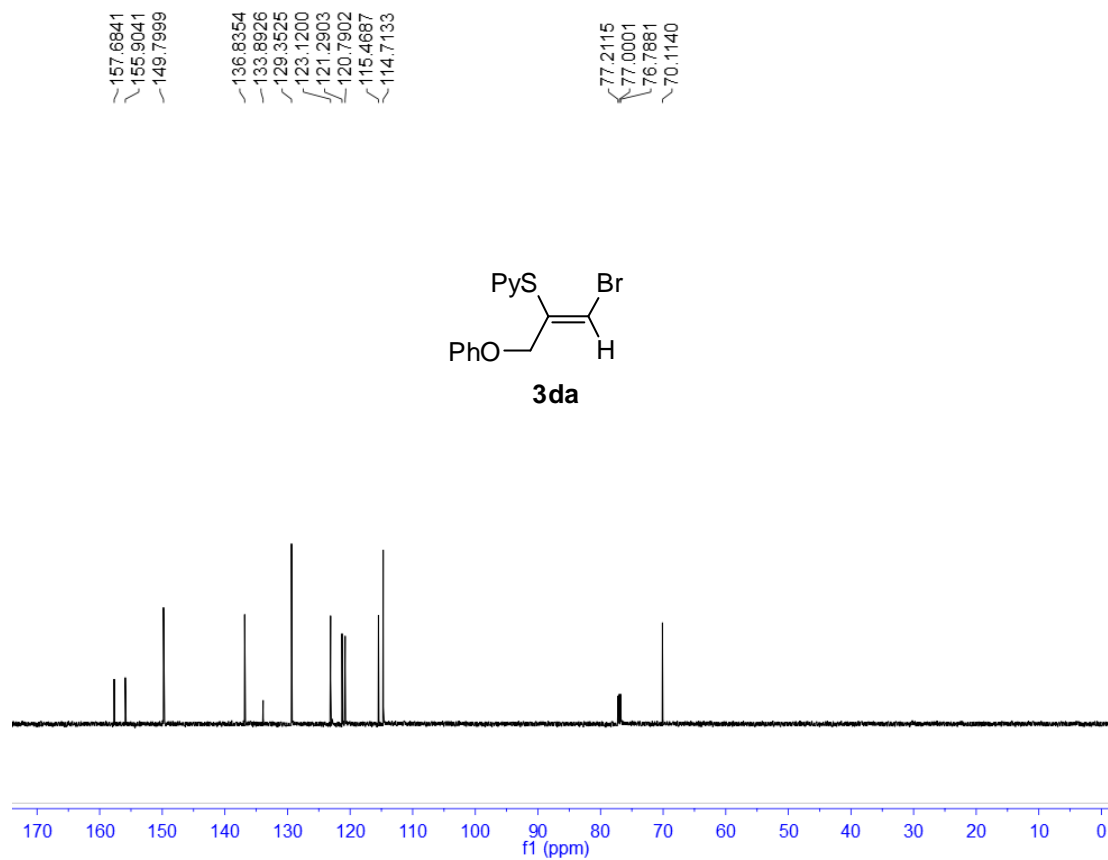



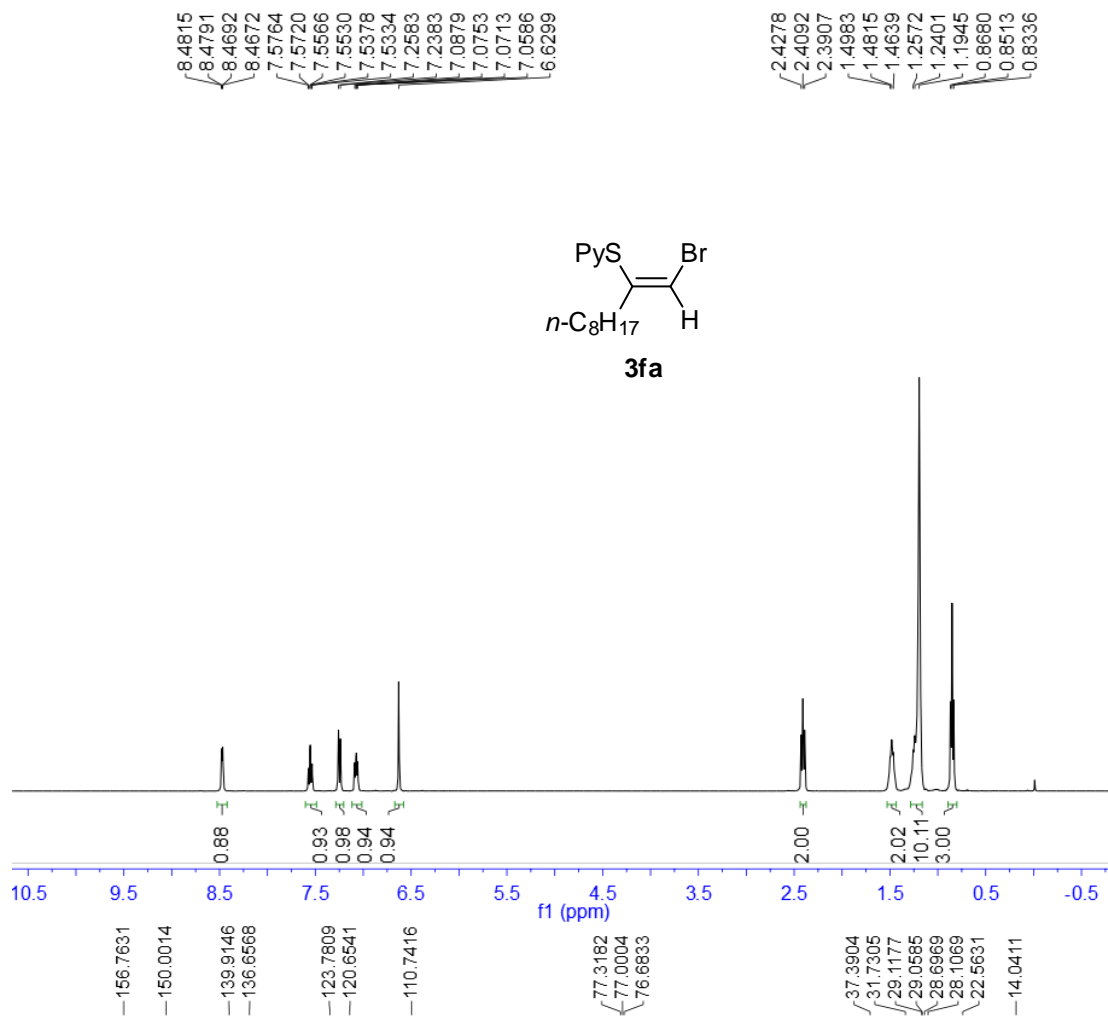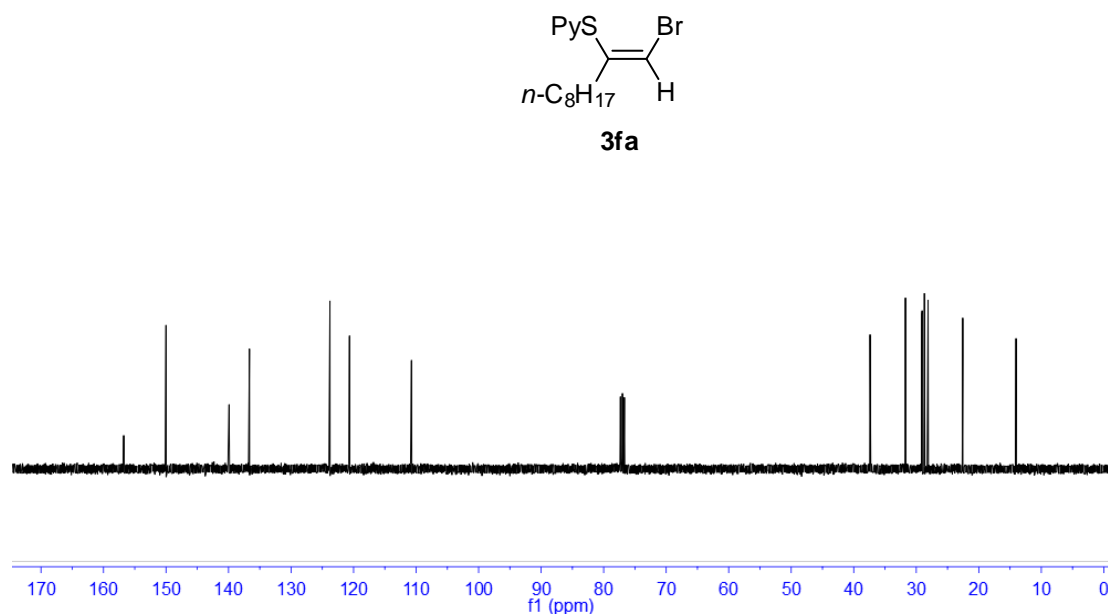

8.4303  
8.4234  
7.5436  
7.5409  
7.5301  
7.5284  
7.5178  
7.5151  
7.2062  
7.1928  
7.0419  
7.0334  
7.0303  
7.0217  
6.7891

2.3573  
2.3543  
2.3445  
2.3348  
2.3318  
1.5390  
1.5271  
1.5183  
1.5060  
1.4564  
1.2559  
1.2494  
1.2462  
1.2433  
1.2310  
1.2175  
0.8917  
0.8745  
0.8622  
0.8568  
0.8498

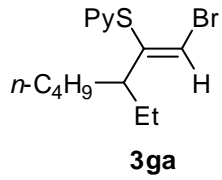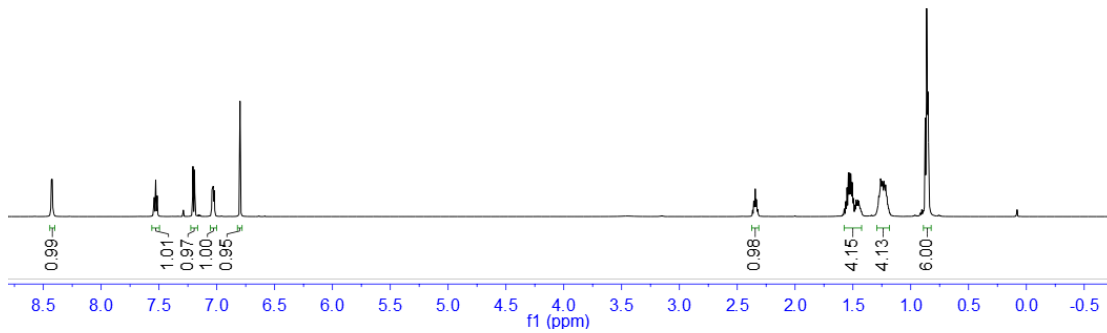

-157.3637  
-149.4829  
-142.3200  
-136.3534  
-122.2678  
-120.0429  
-114.5573

-77.2117  
-76.9999  
-76.7878

-50.6607

-32.4579  
-29.3185  
-25.9972  
-22.5412  
-13.8804  
-11.6362

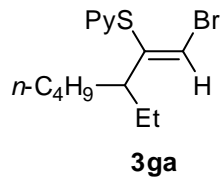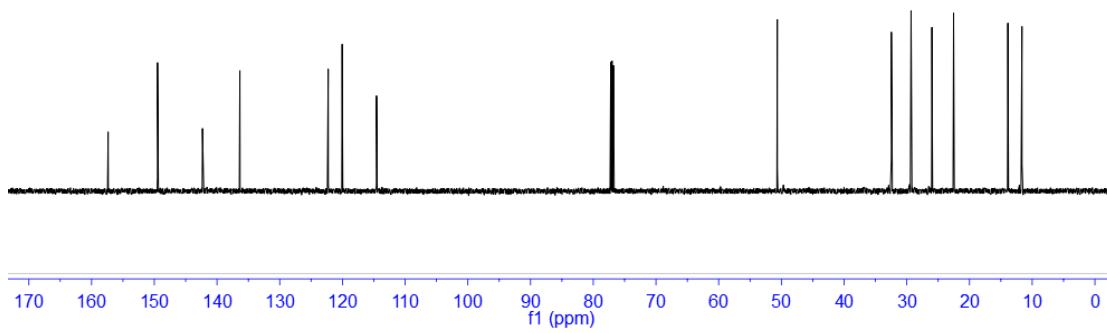



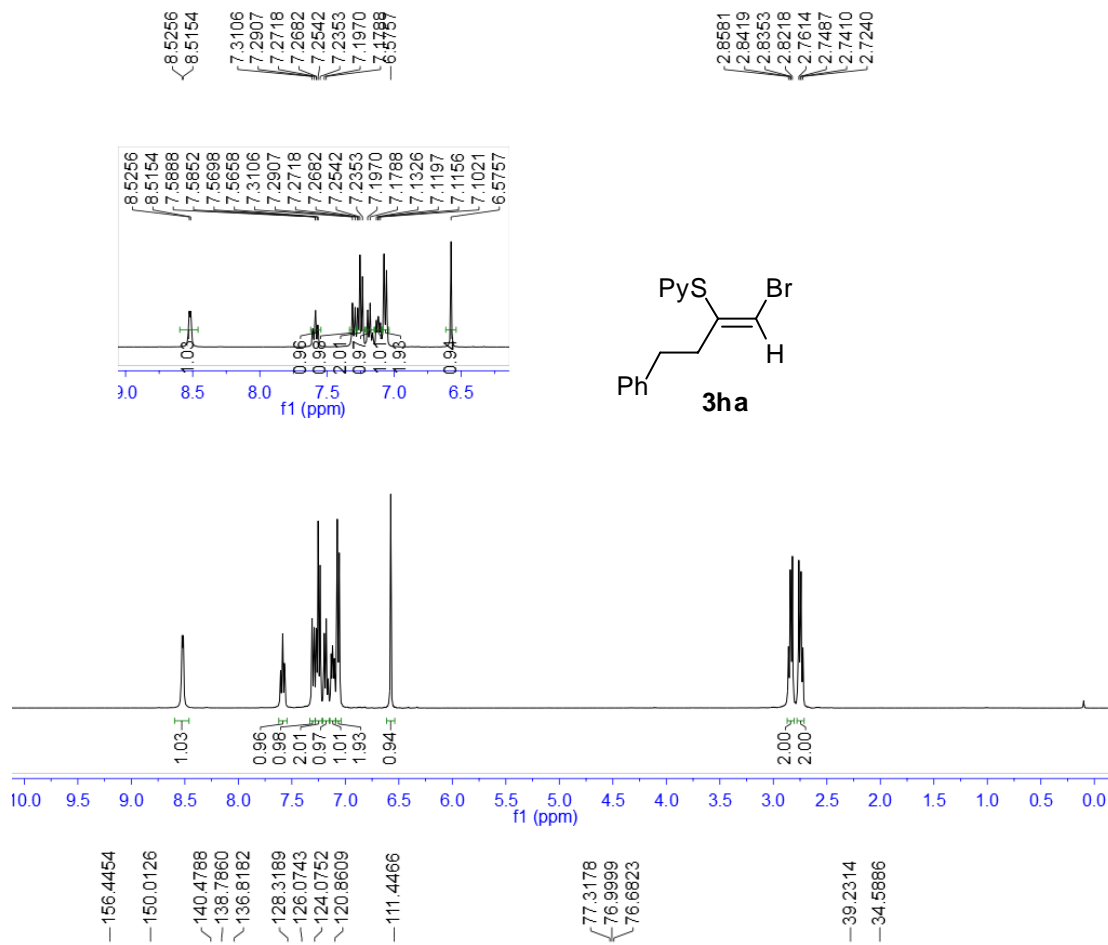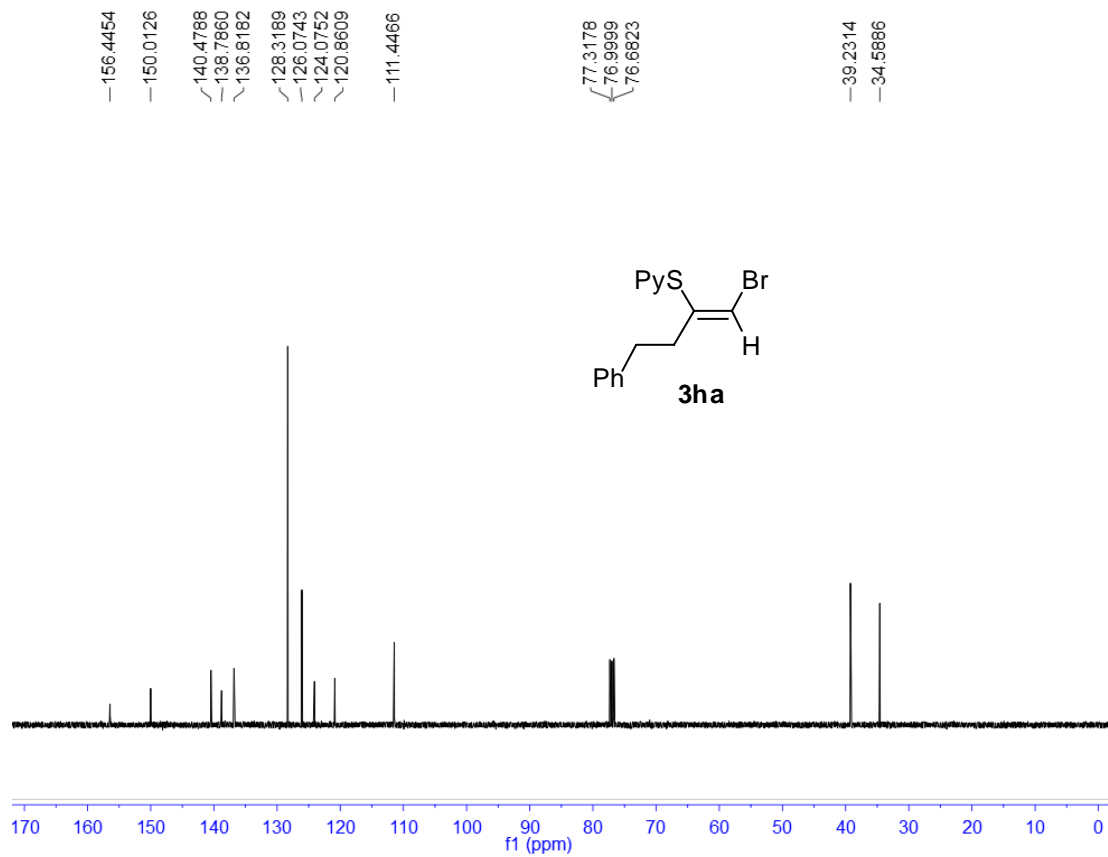

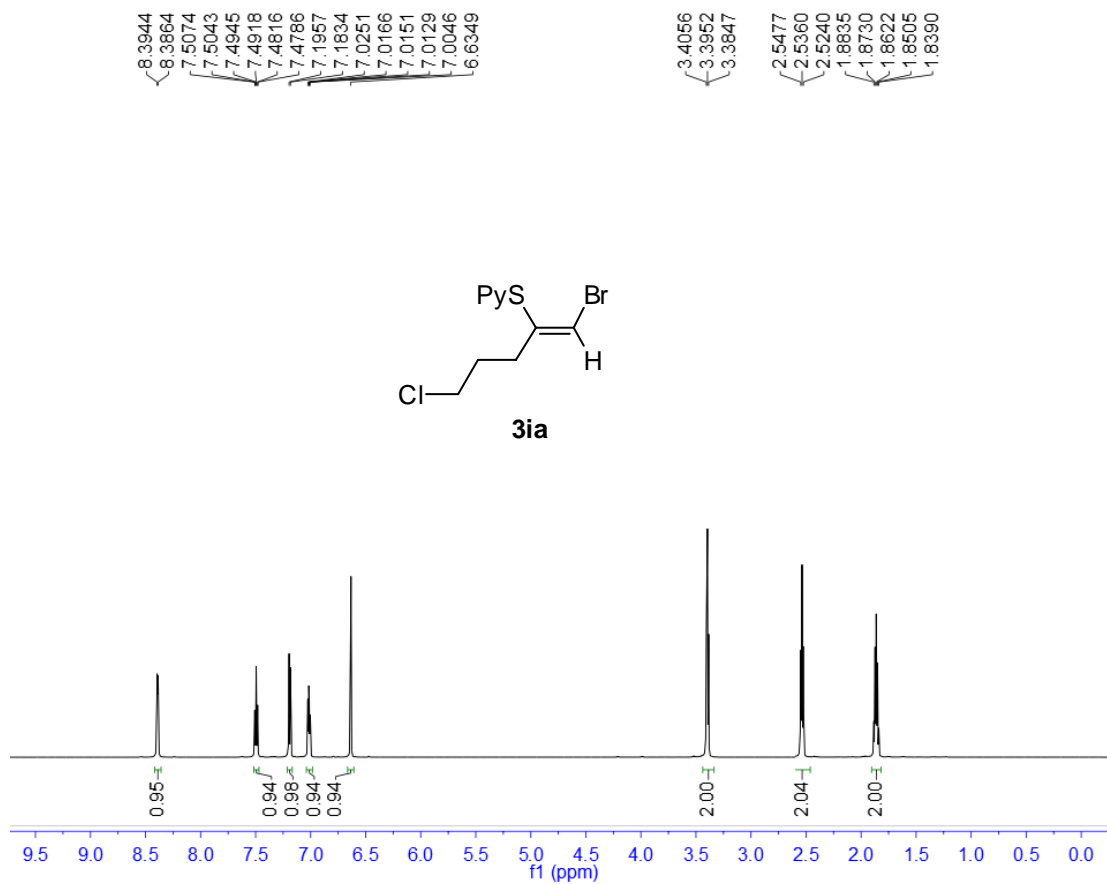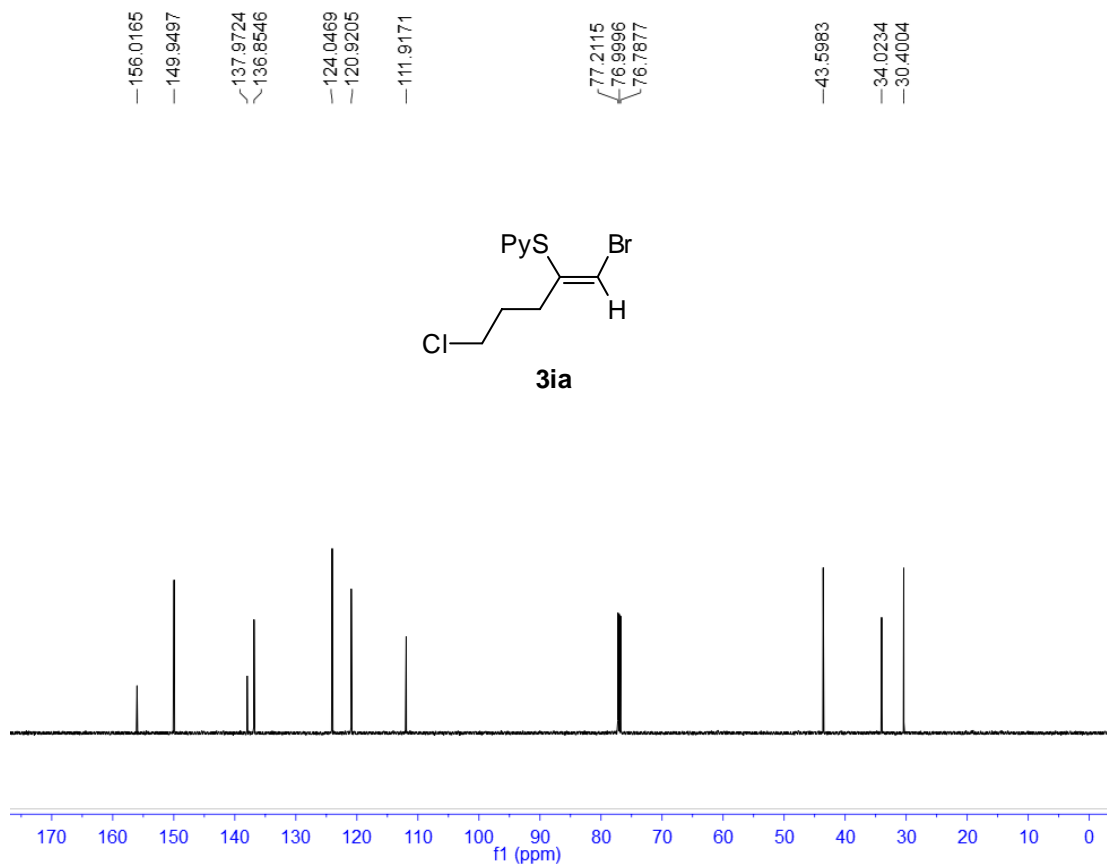

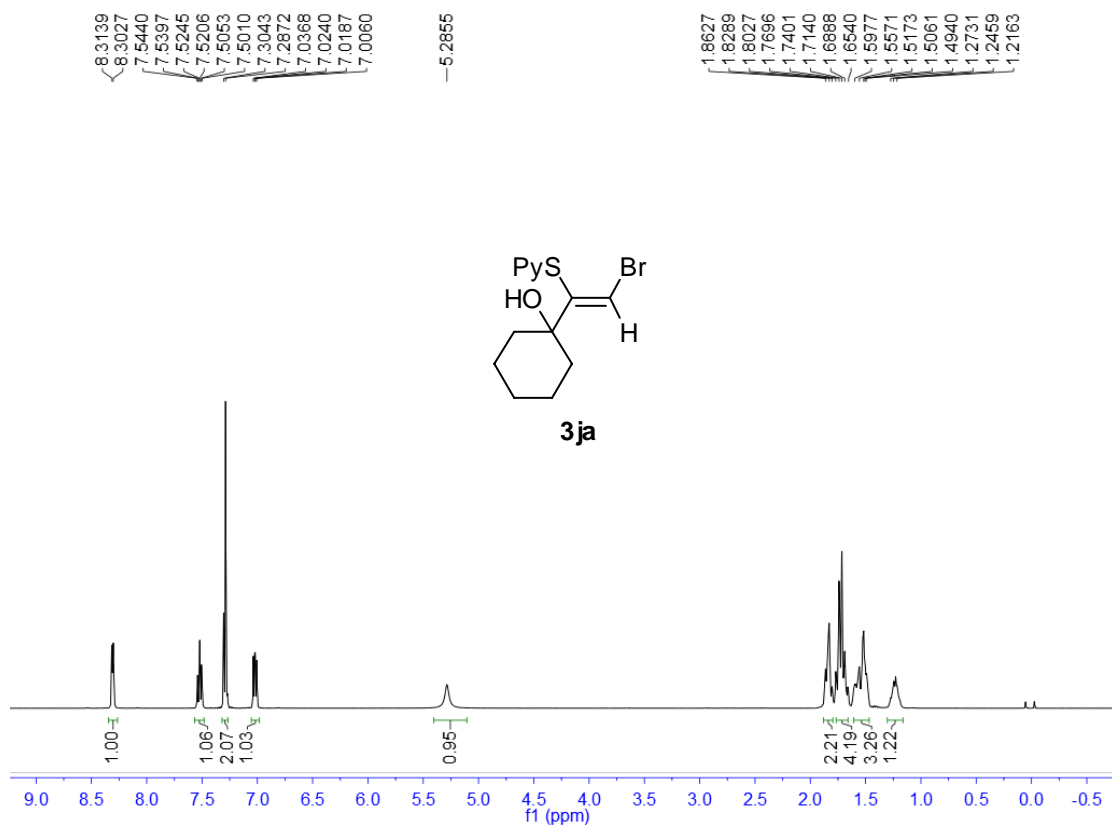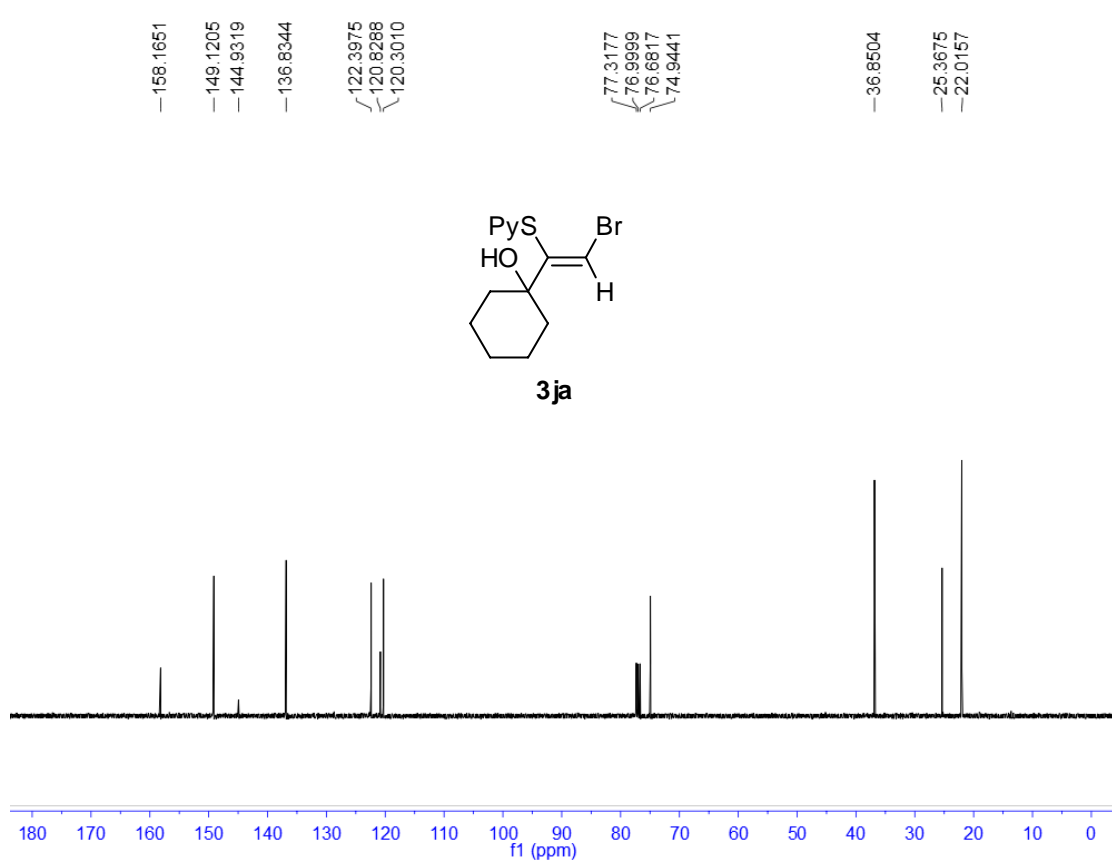

8.3441  
8.3318  
7.5965  
7.5920  
7.5761  
7.5729  
7.5680  
7.5534  
7.3613  
7.3413  
7.0831  
7.0706  
7.0647  
7.0522  
6.9282

3.8403  
3.8343  
3.8272  
3.8210  
3.8137  
3.8078

2.6382  
2.6258  
2.6134

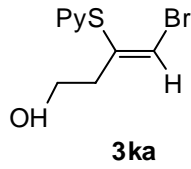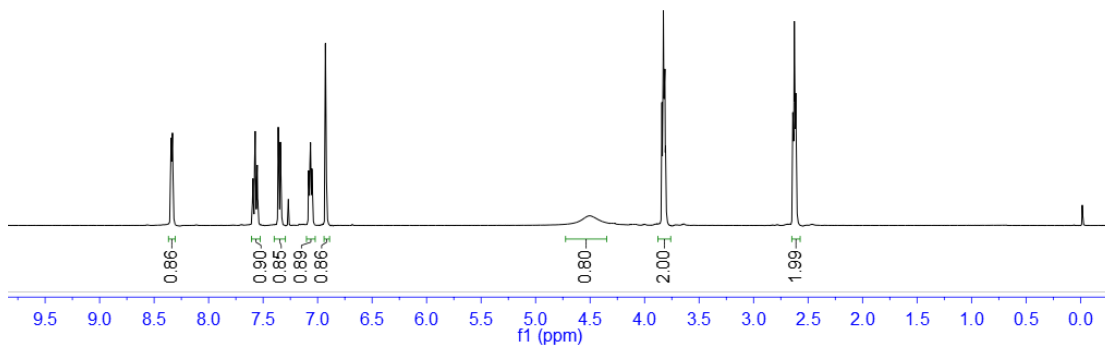

-157.6111  
-149.5824  
-137.0368  
-135.6396  
-124.0017  
-120.6786  
-117.7807  
77.3208  
77.0004  
76.6843  
-58.5681  
-42.9382

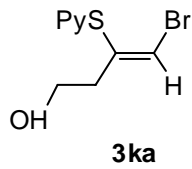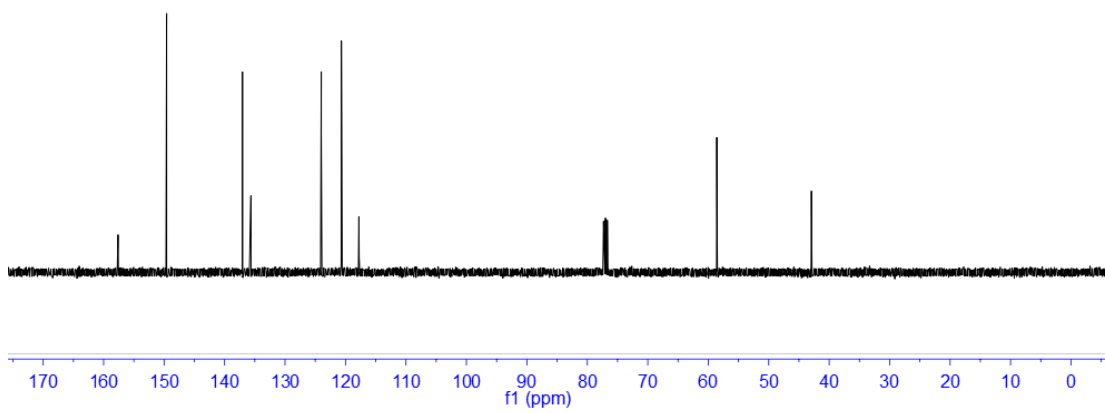

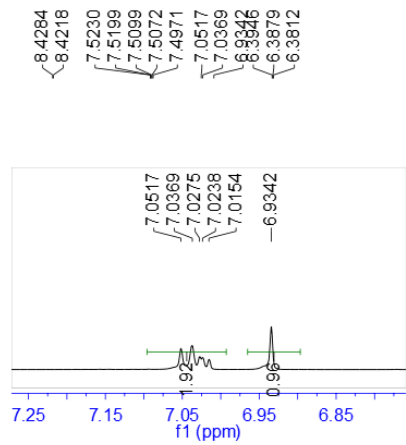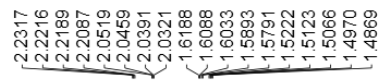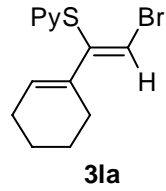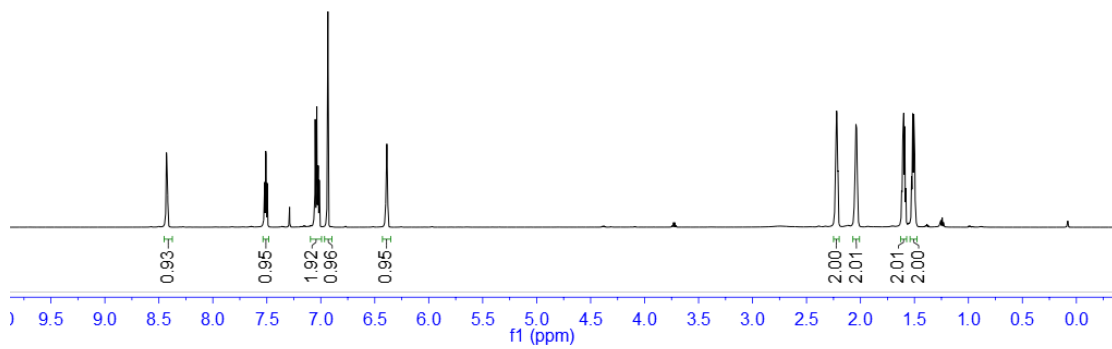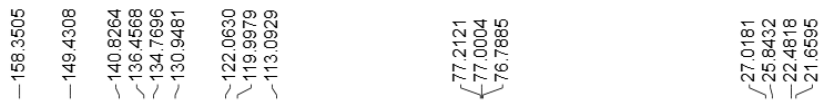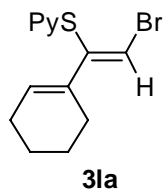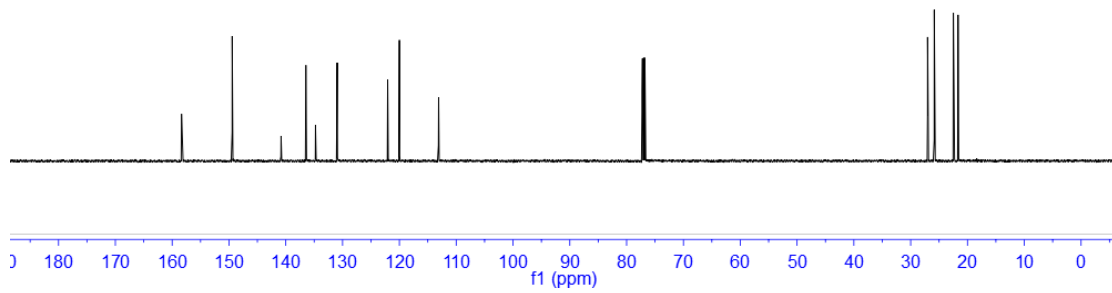

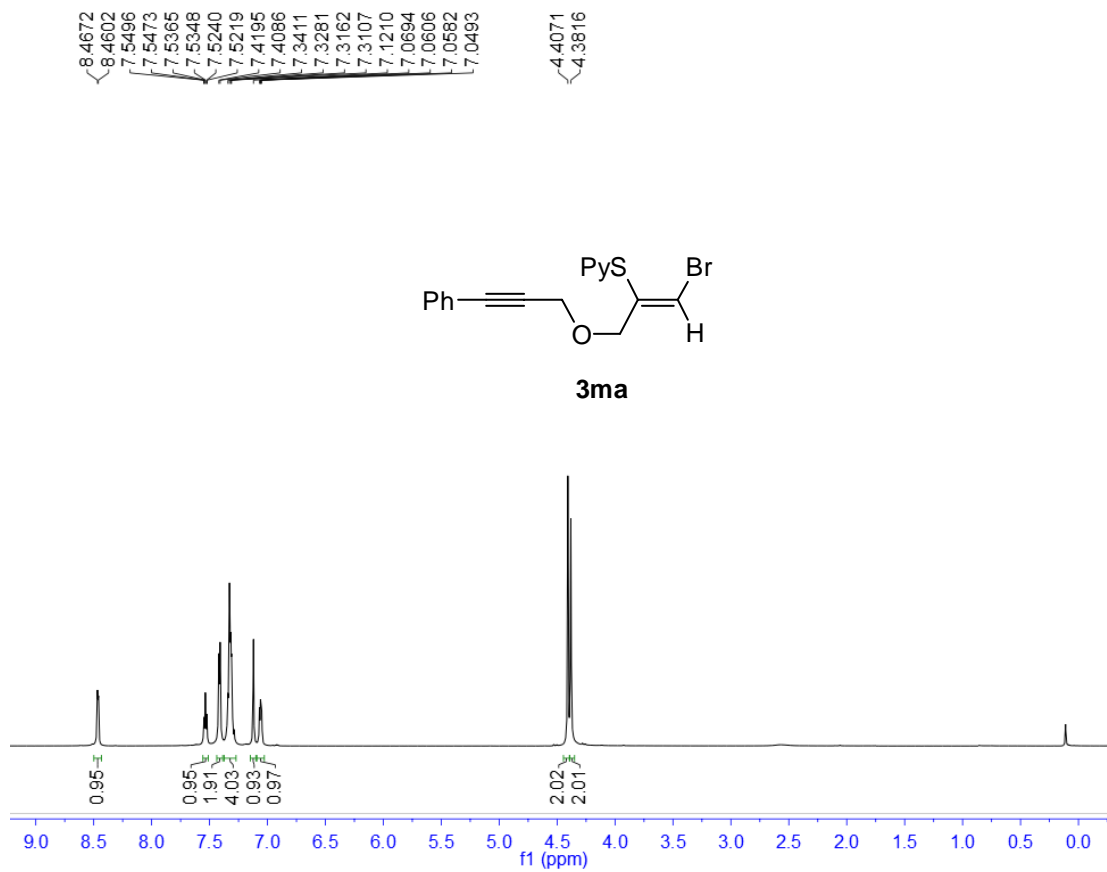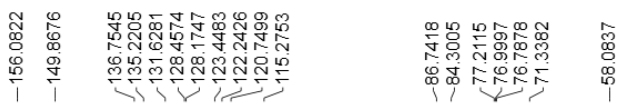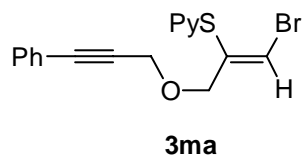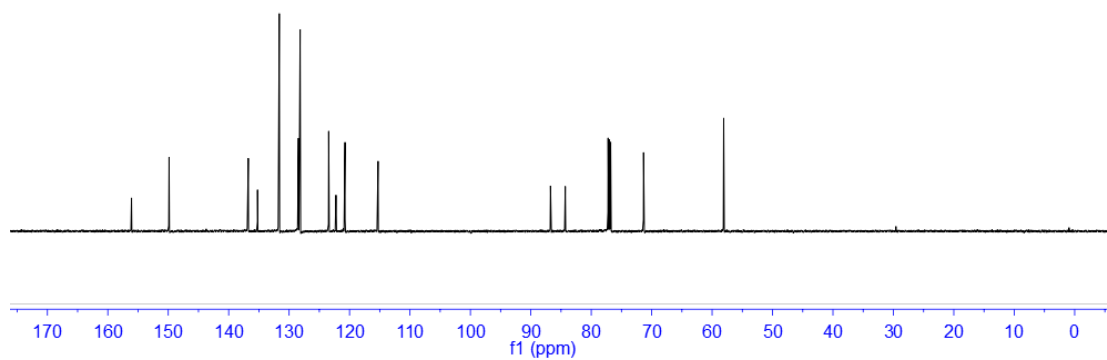

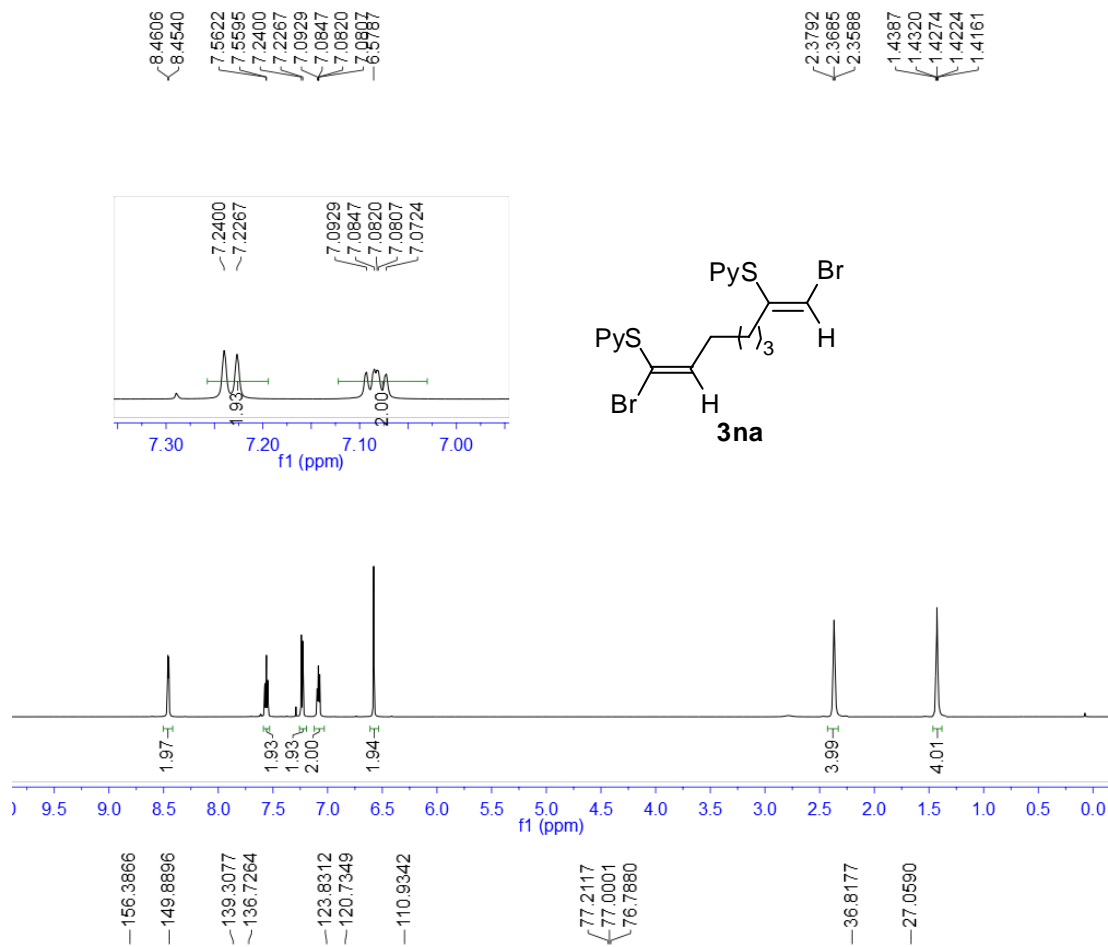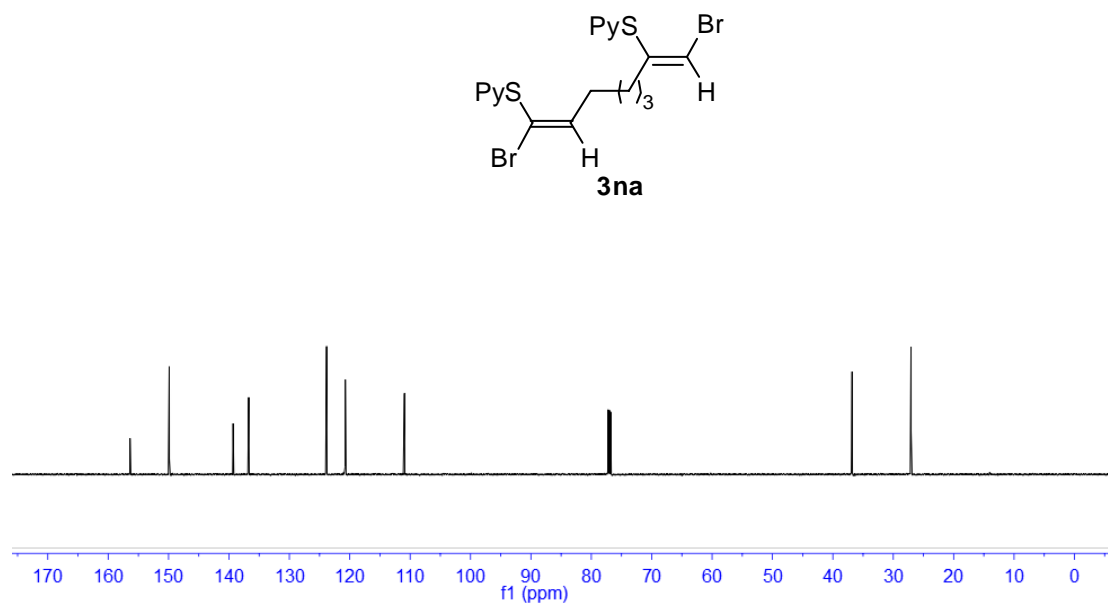

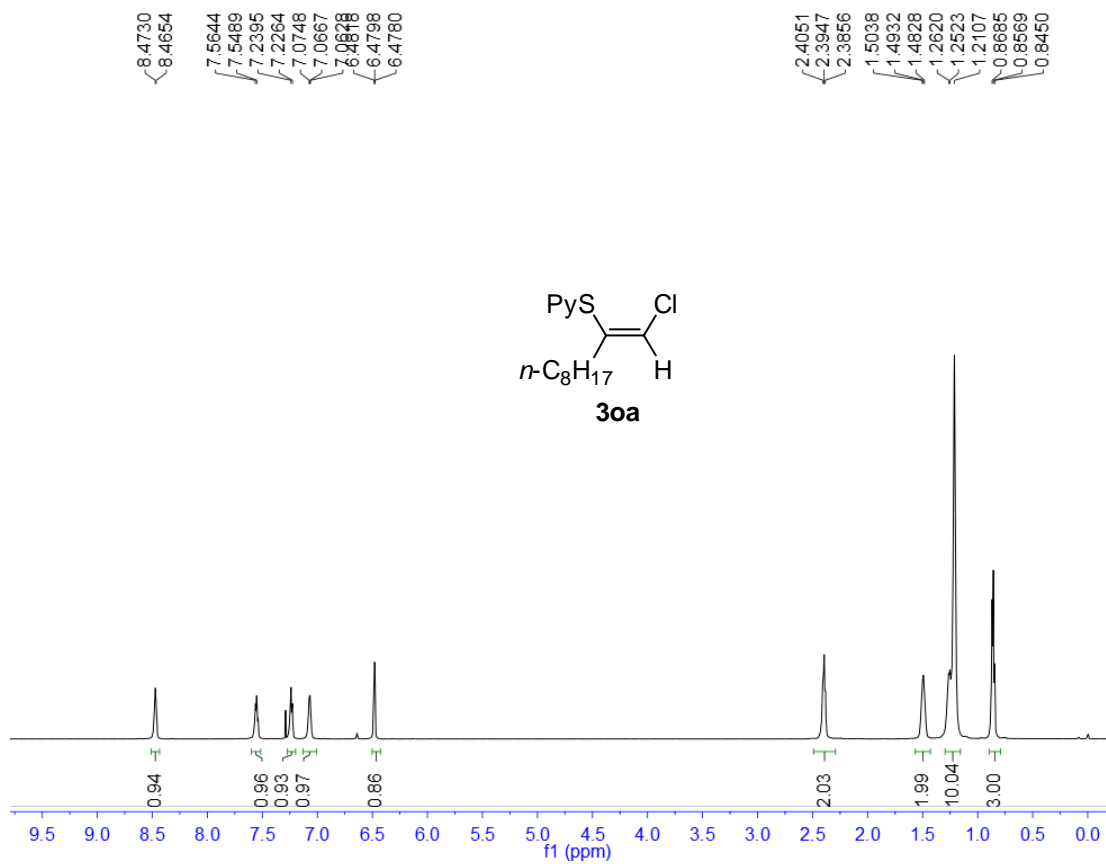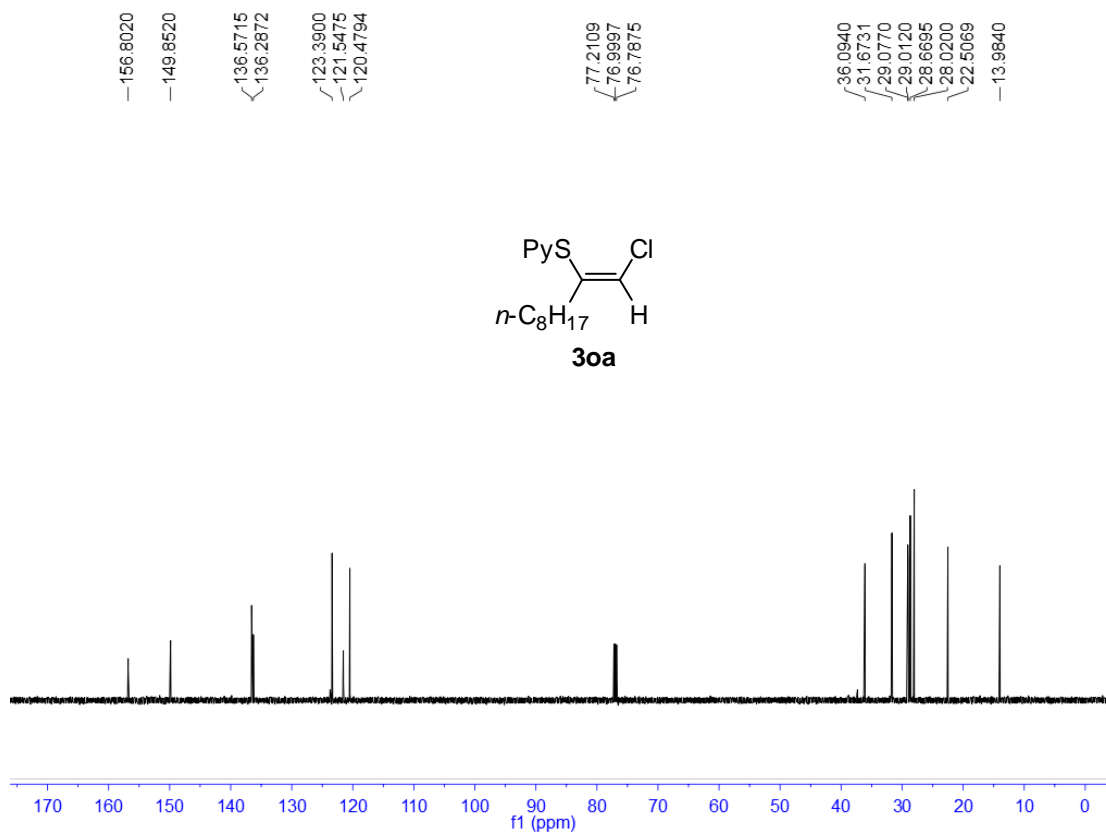



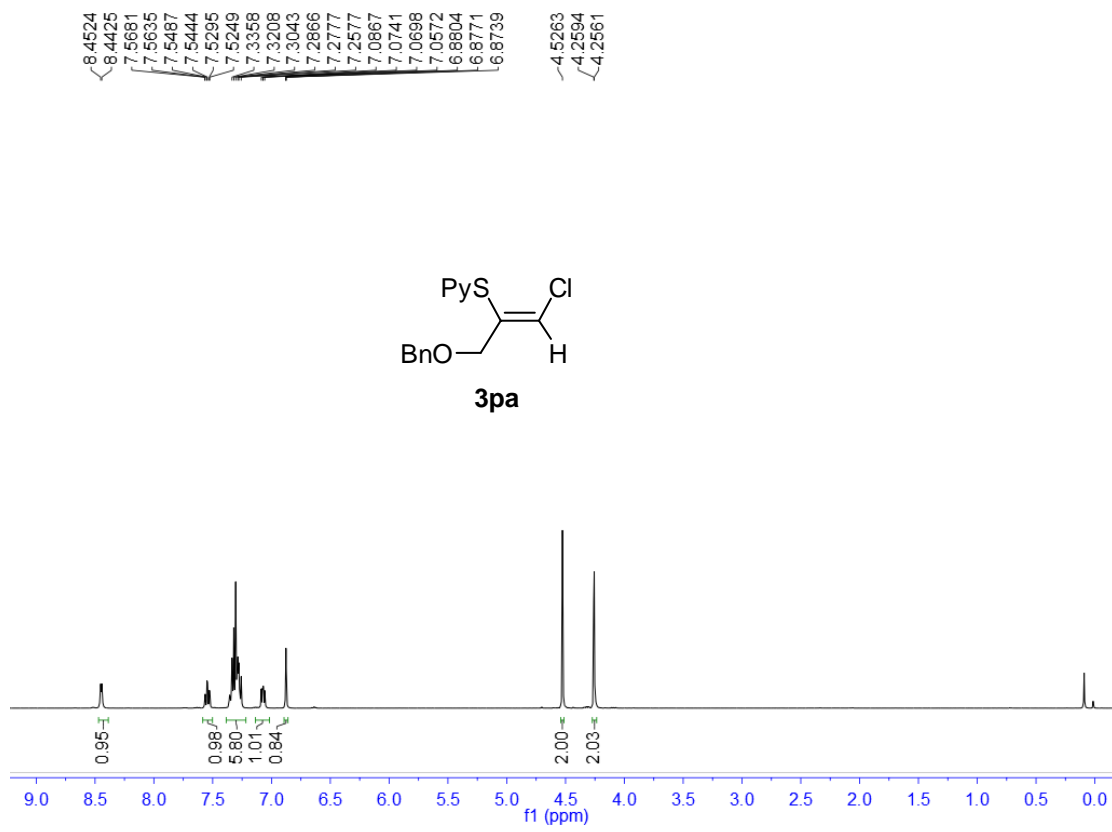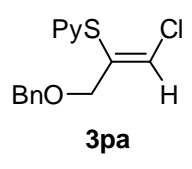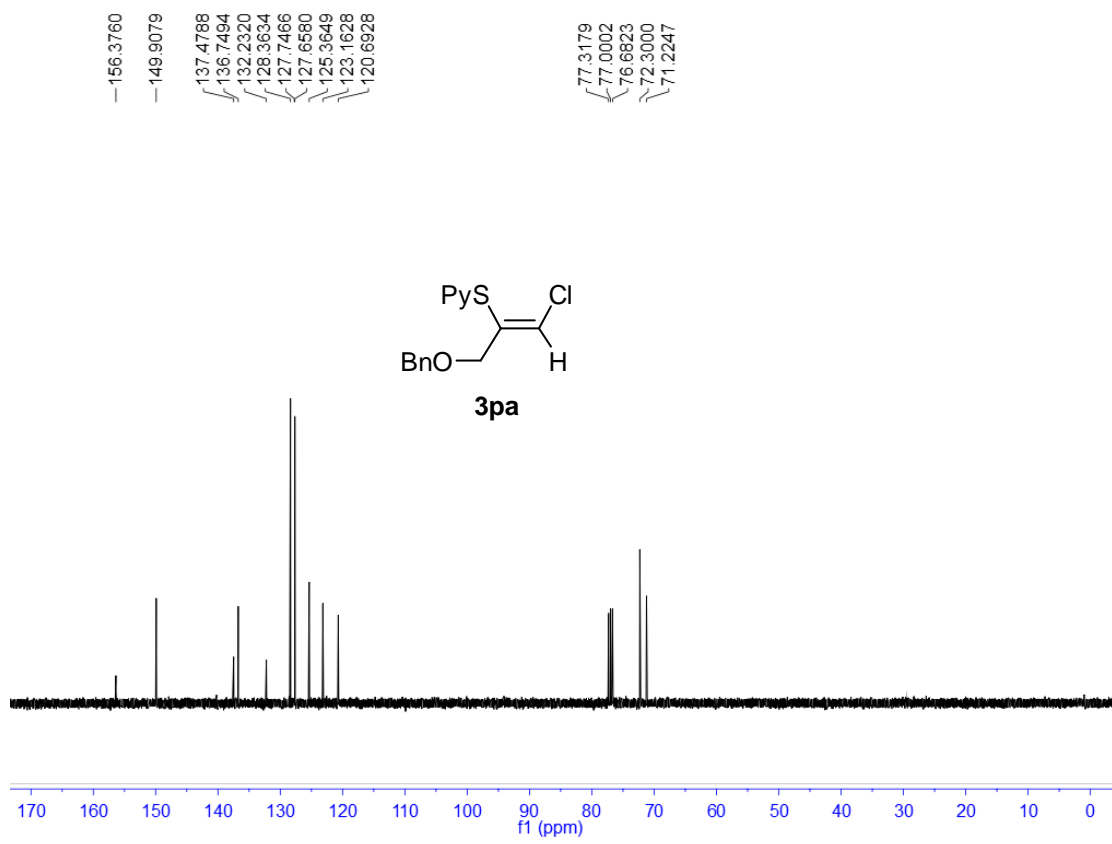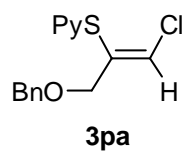

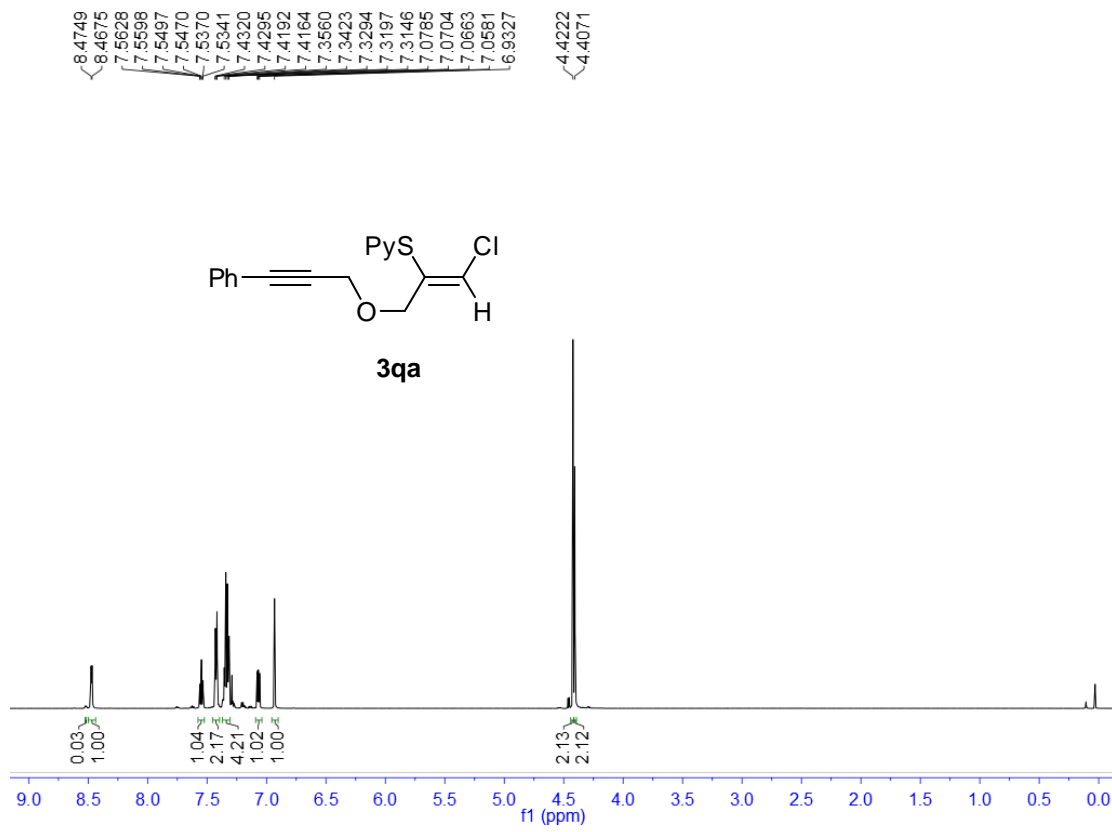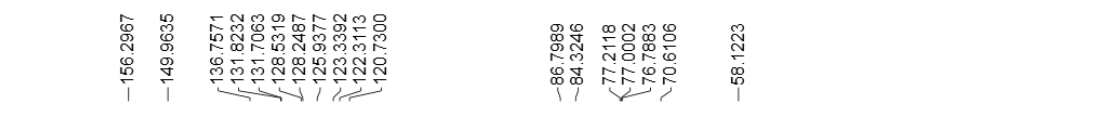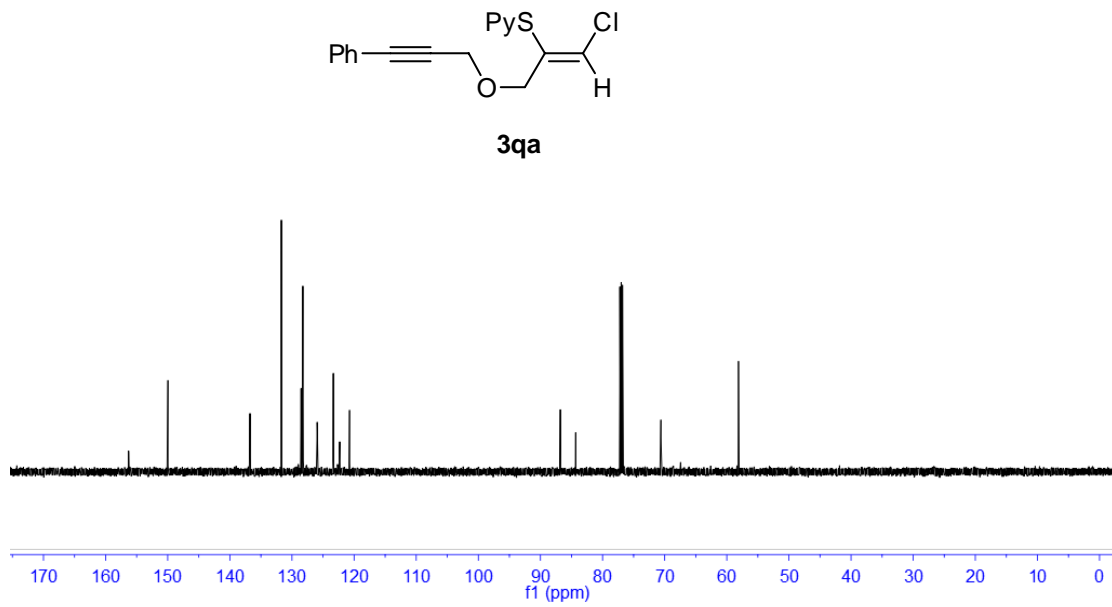

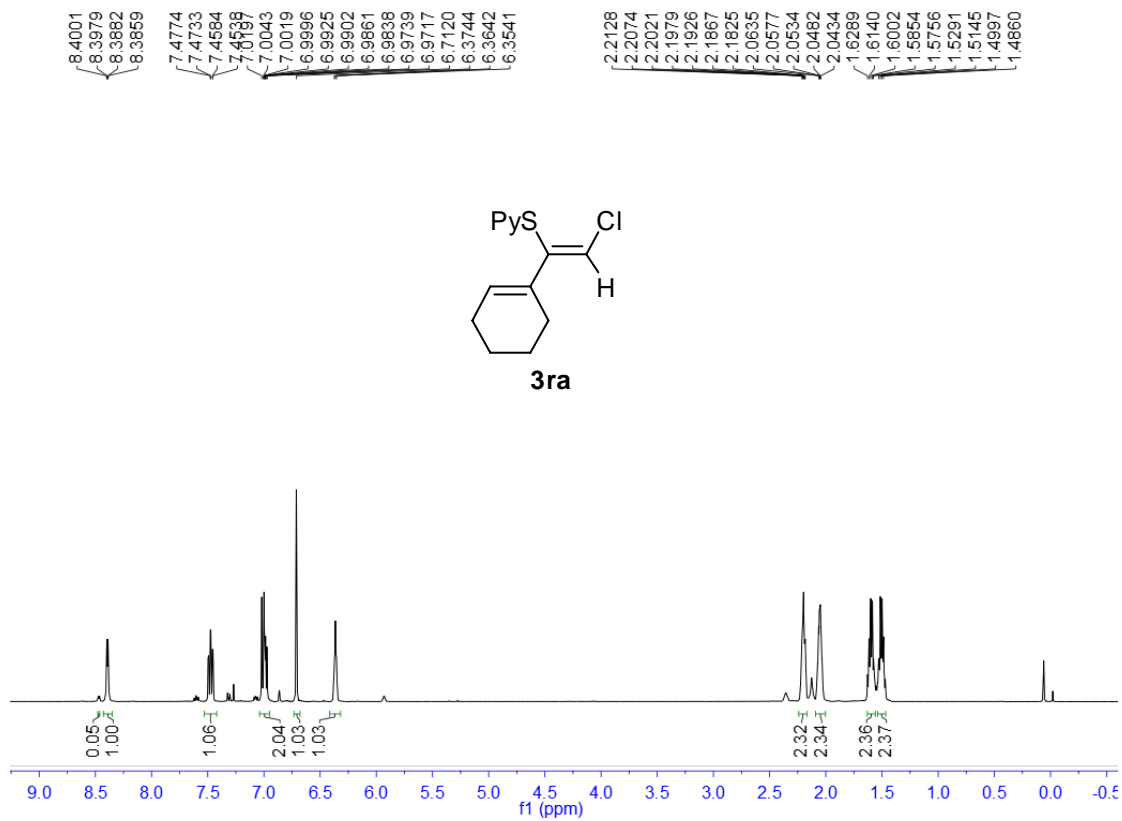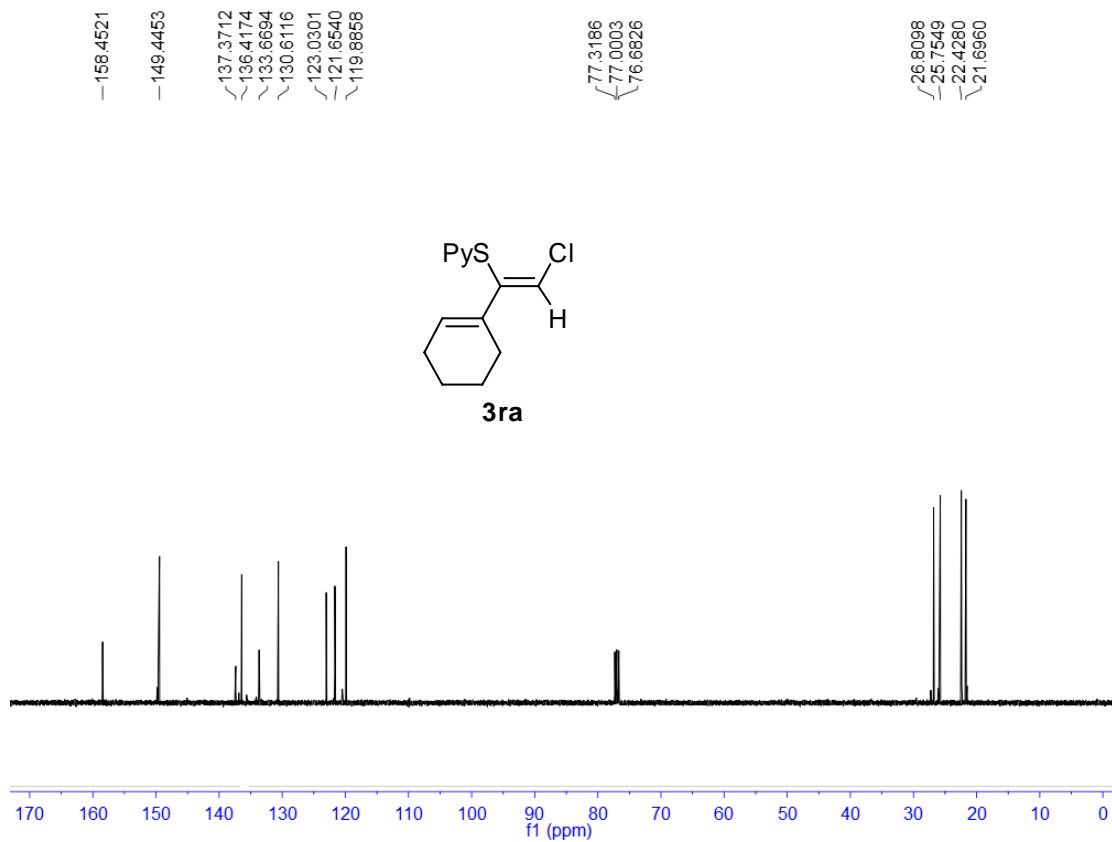

8.6535  
8.6454  
8.4247  
8.4166  
7.6186  
7.6119  
7.6060  
7.6028  
7.3180  
7.3093  
7.3026  
7.3006  
7.2948  
7.2913  
7.1492  
6.9376  
6.9296  
6.9215

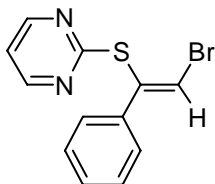

**3sb**

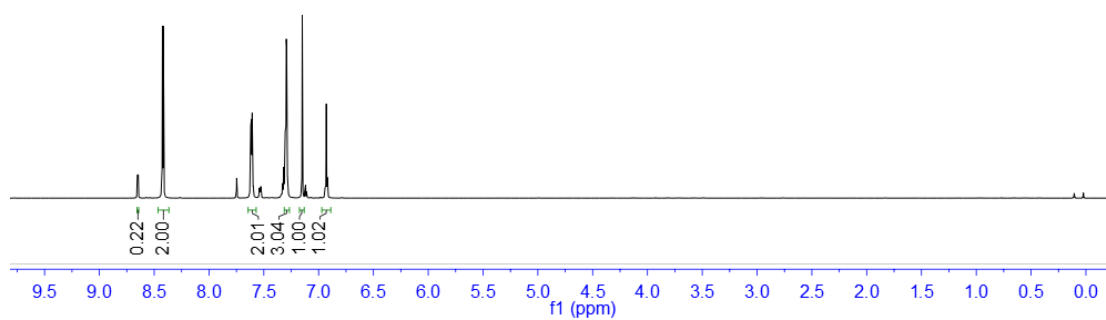

169.9509  
157.4378  
138.8721  
138.2939  
128.4008  
128.2612  
127.3377  
117.1527  
115.6425  
77.2120  
77.0001  
76.7878

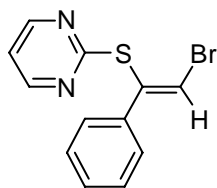

**3sb**

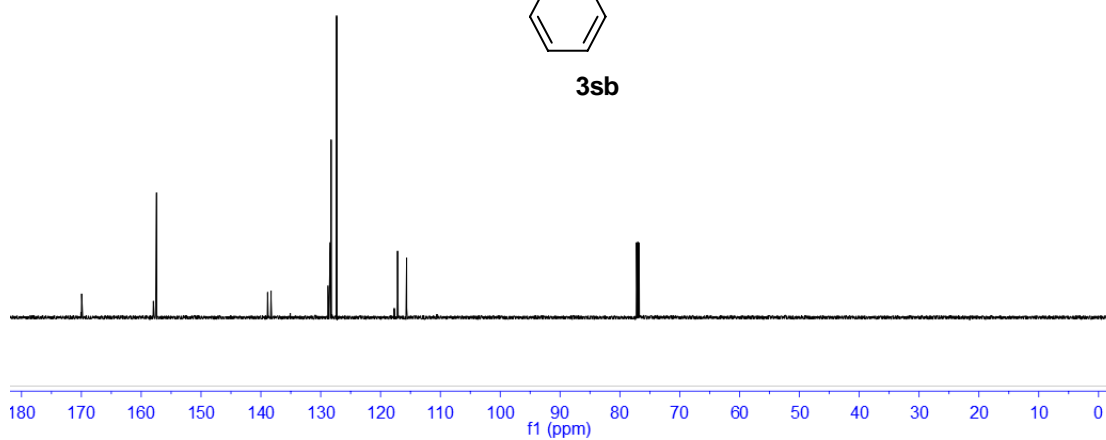

8.6279  
8.6157  
8.4089  
8.3948  
7.5685  
7.5552  
7.5466  
7.5333  
7.0589  
6.9712  
6.9664  
6.9496  
6.9369  
6.9251  
6.9127

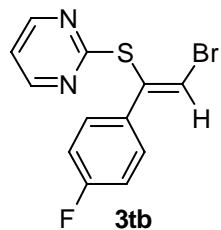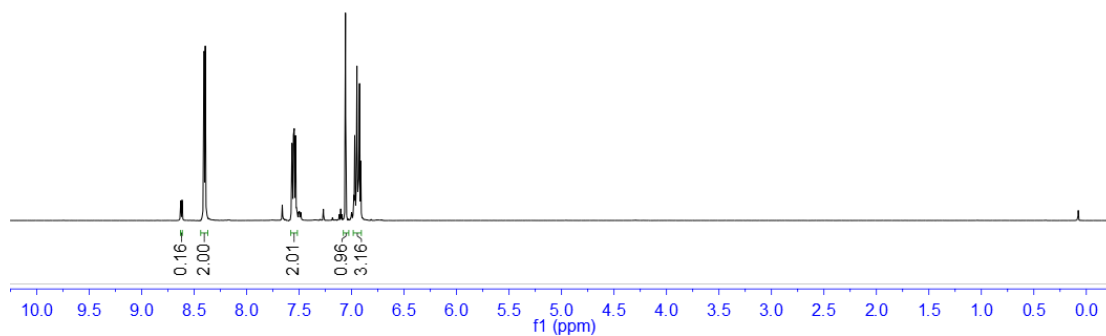

169.8149  
163.8591  
161.3888  
157.4603  
144.5749  
137.4269  
135.1588  
135.1262  
129.2138  
129.1317  
117.2475  
115.3077  
115.0911  
77.3174  
76.9997  
76.6820

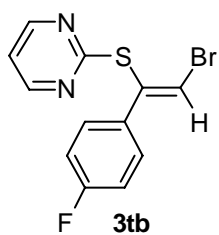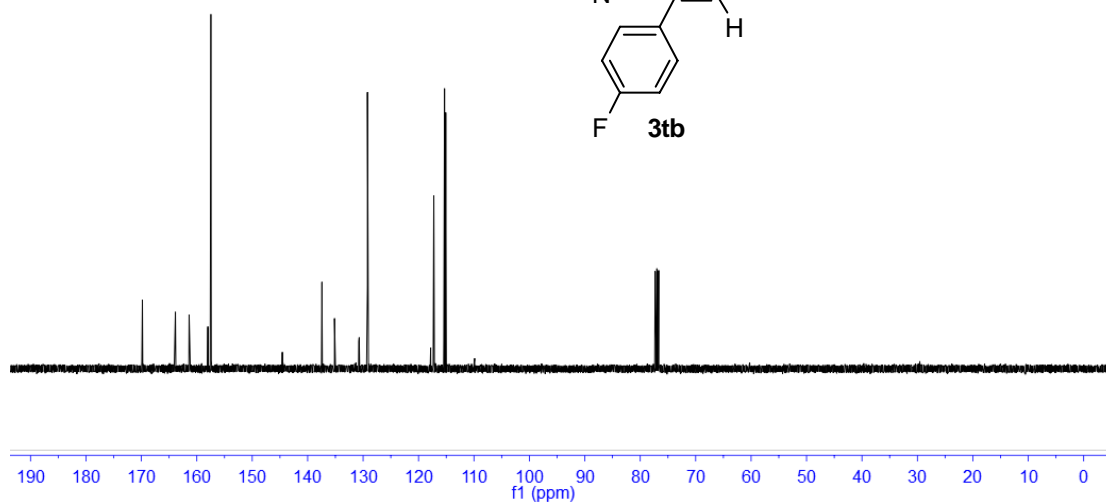

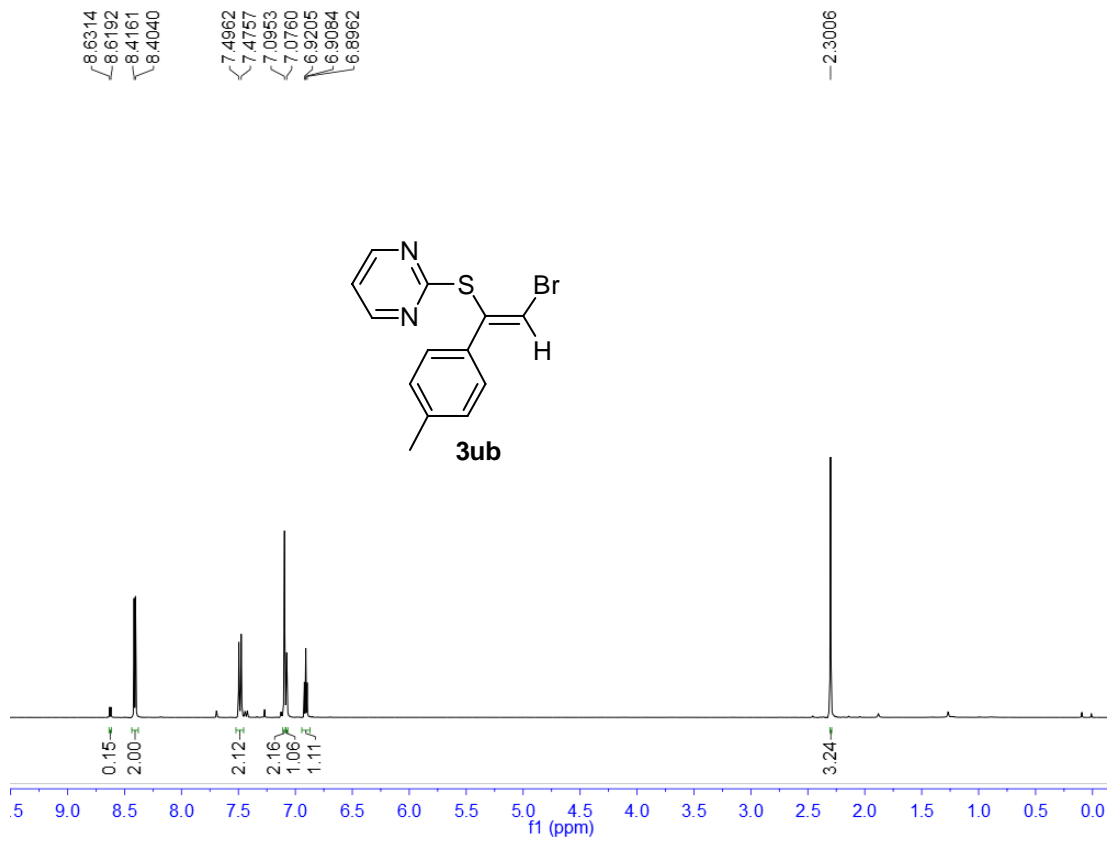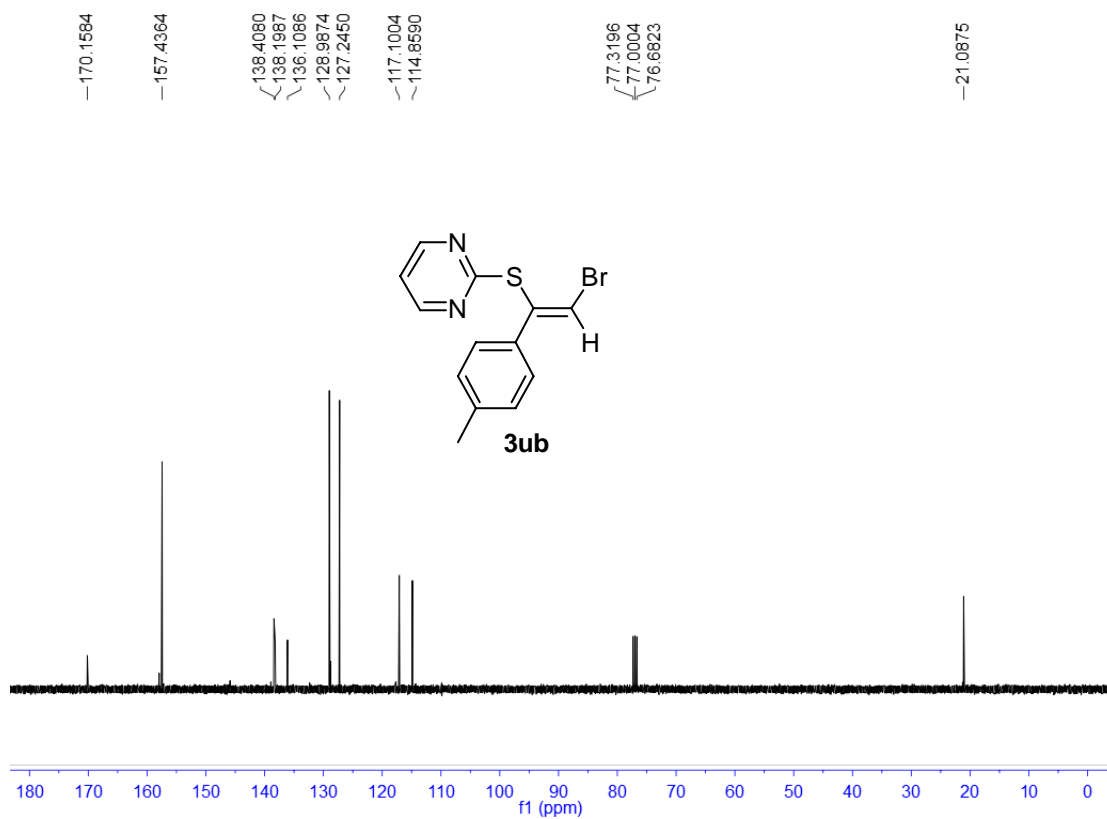

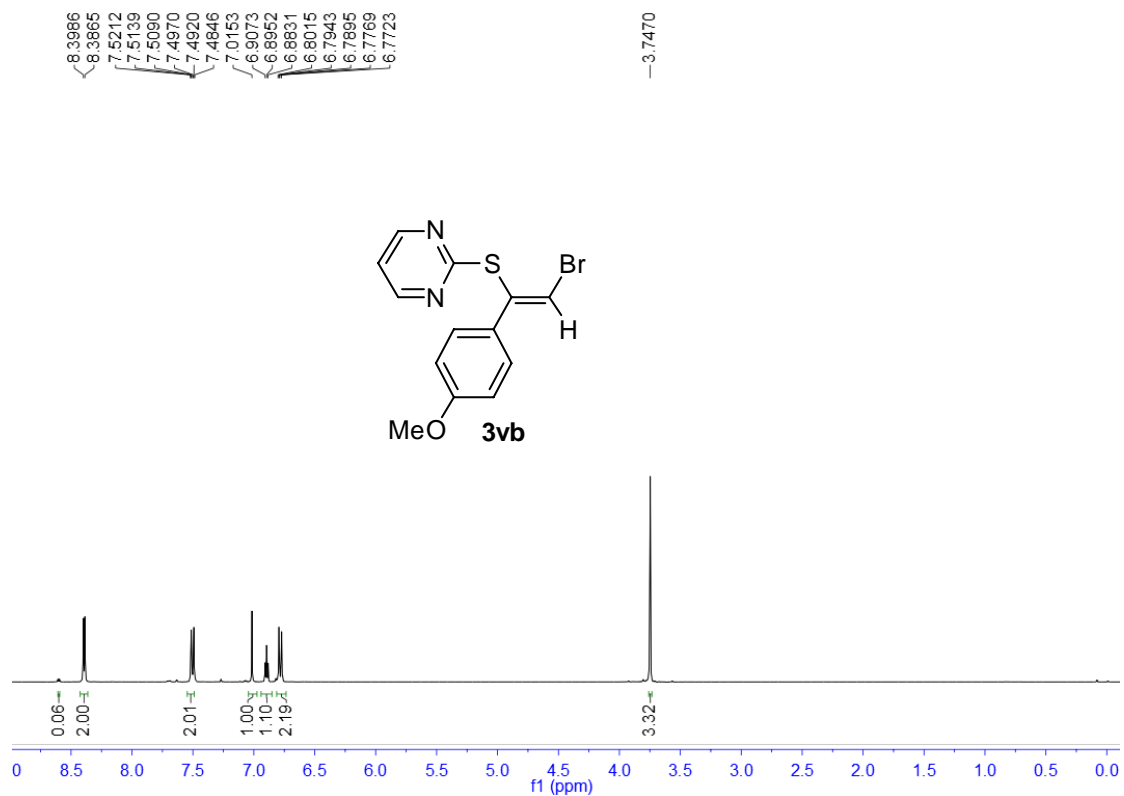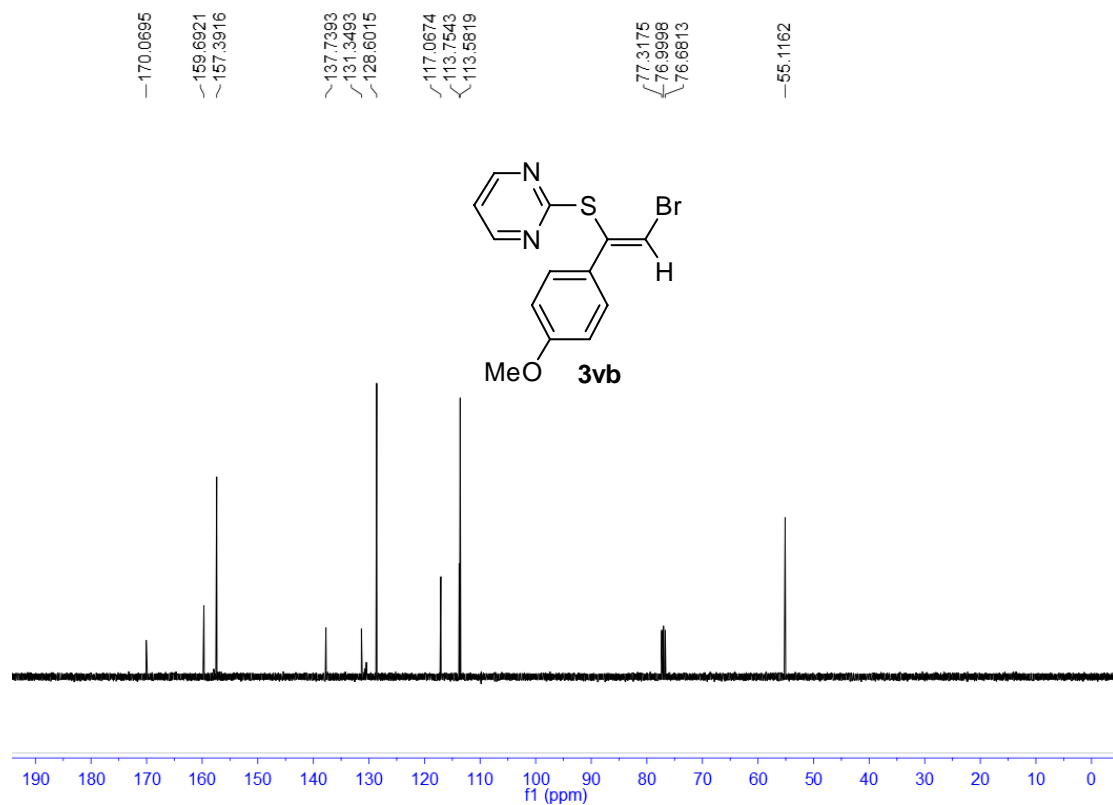

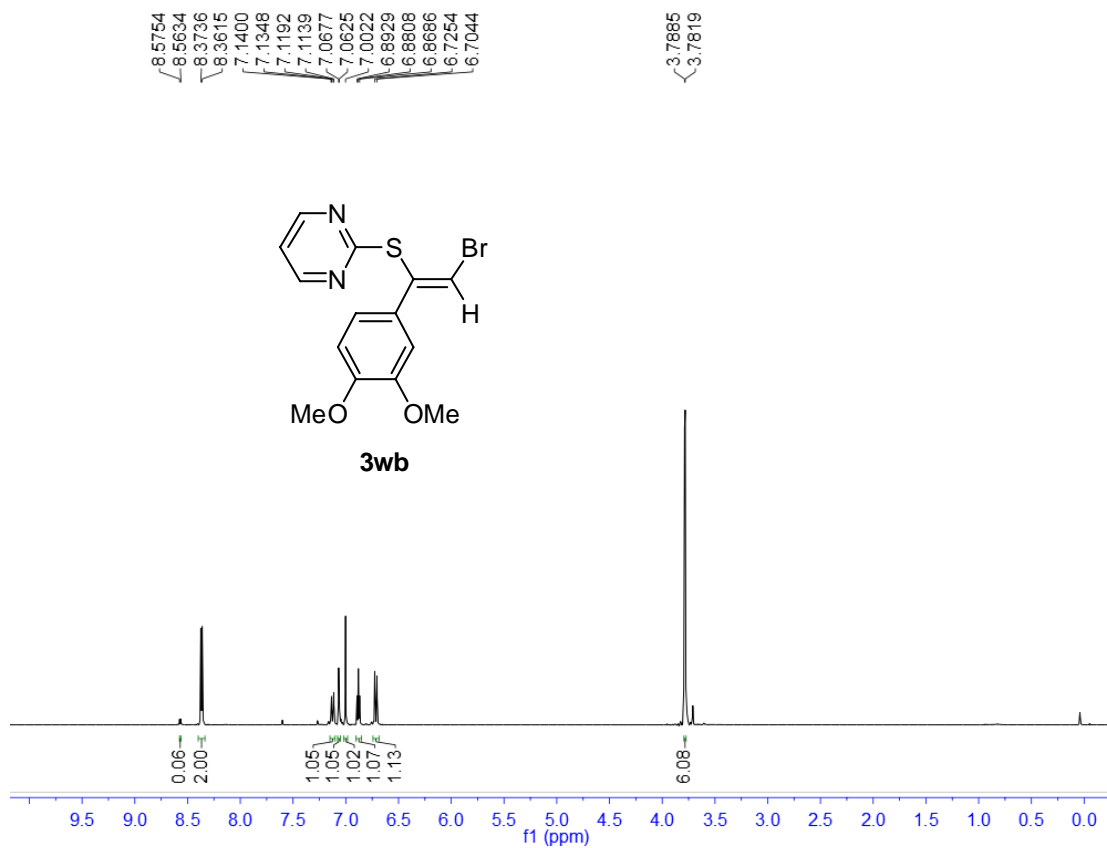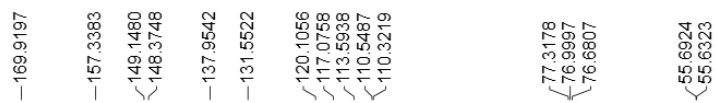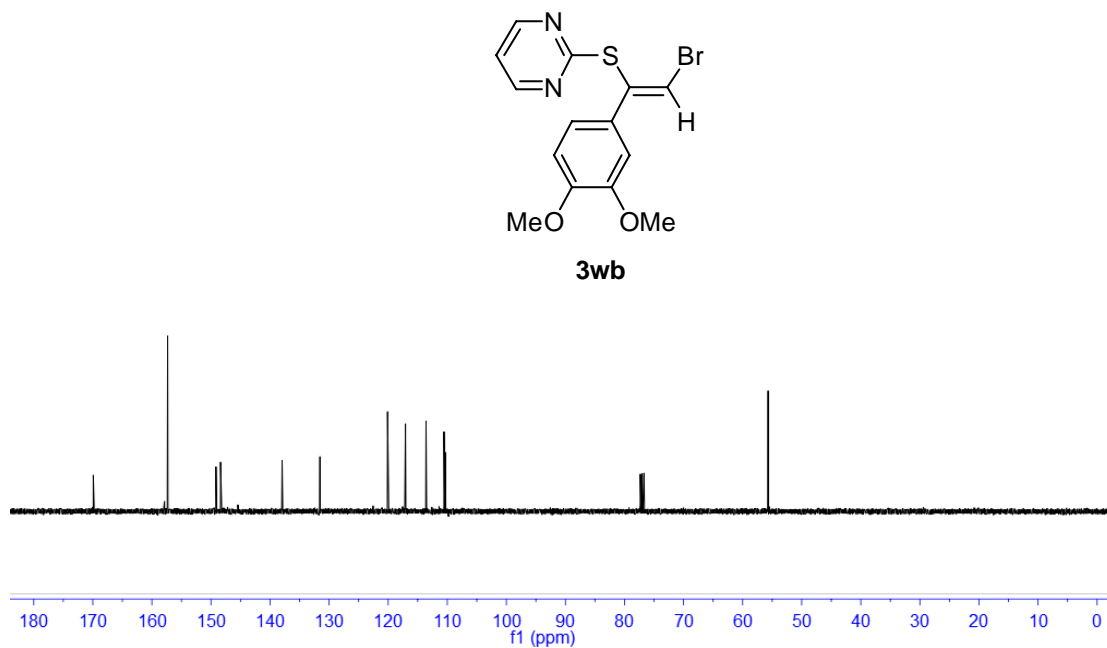



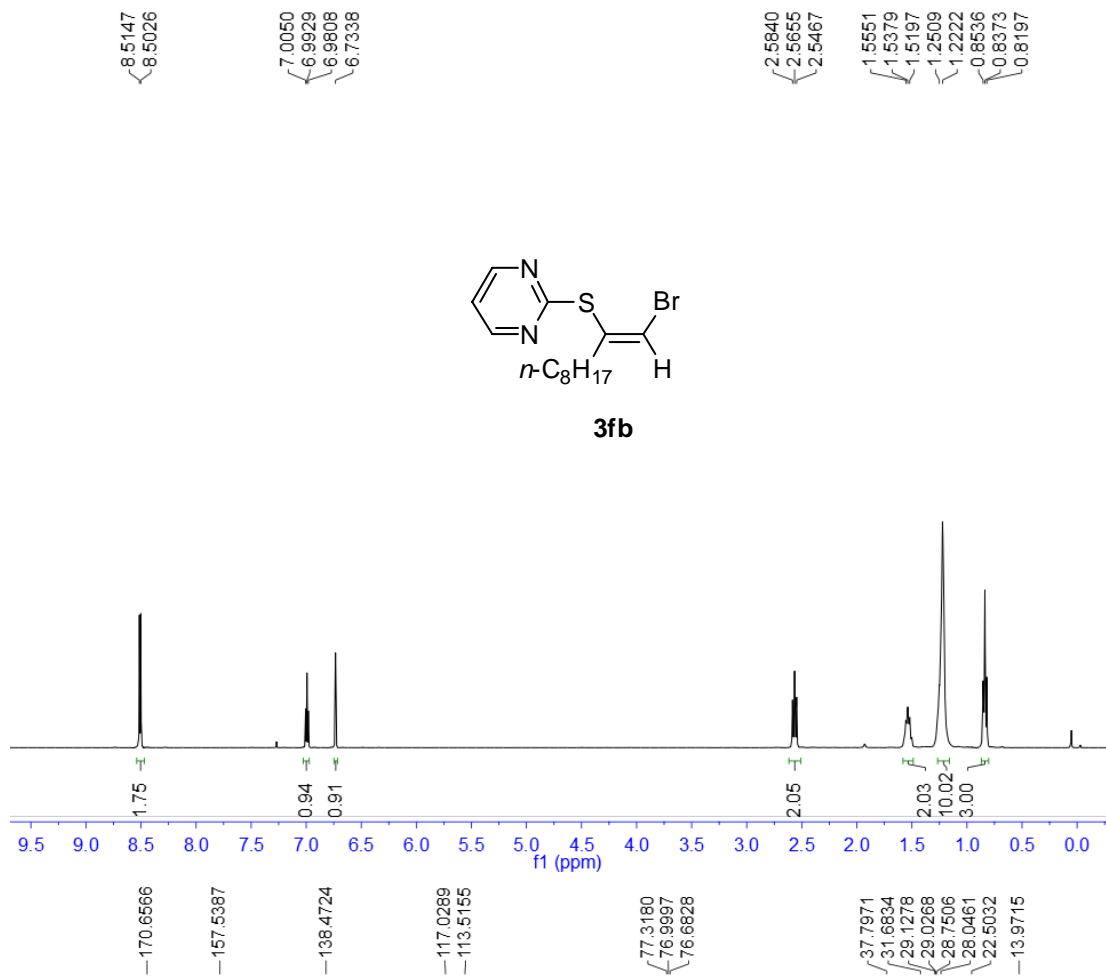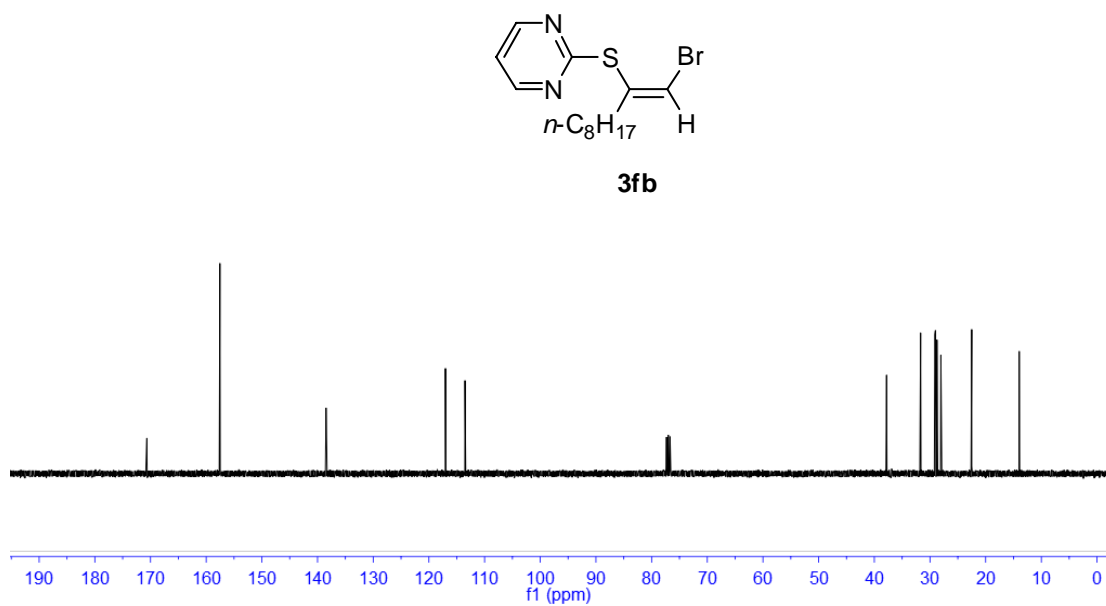

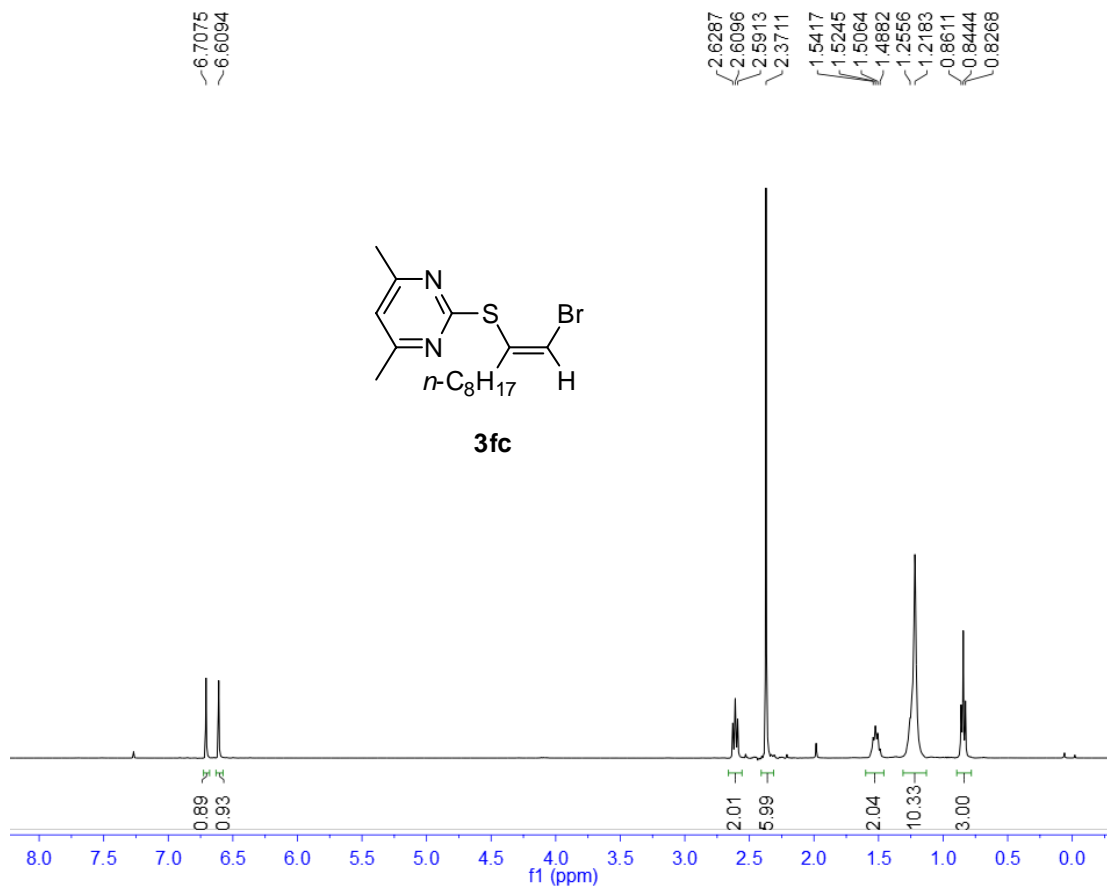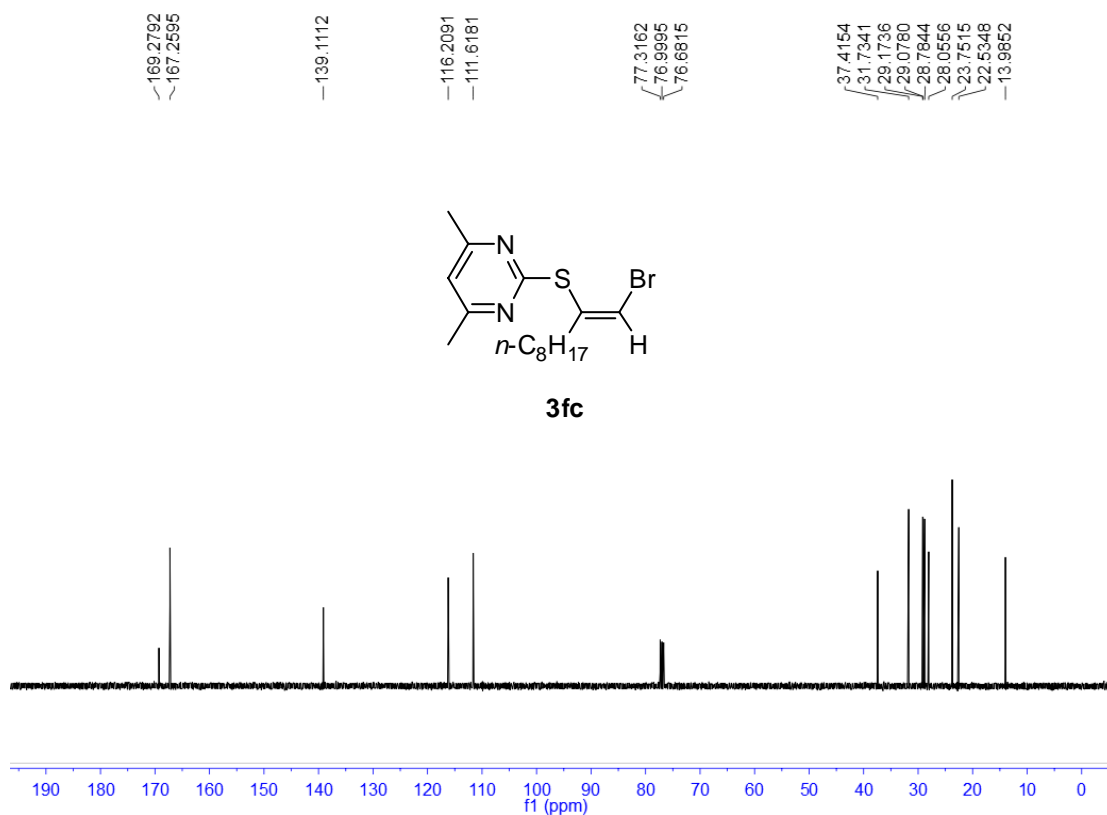

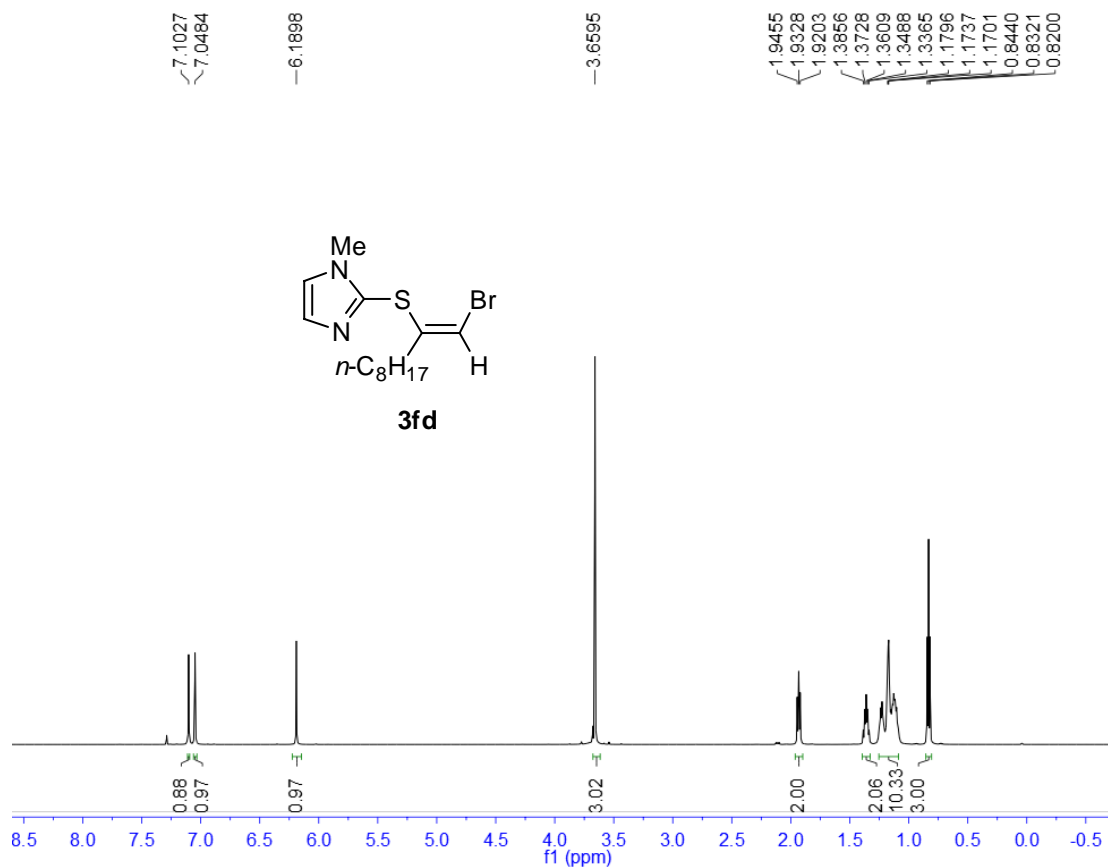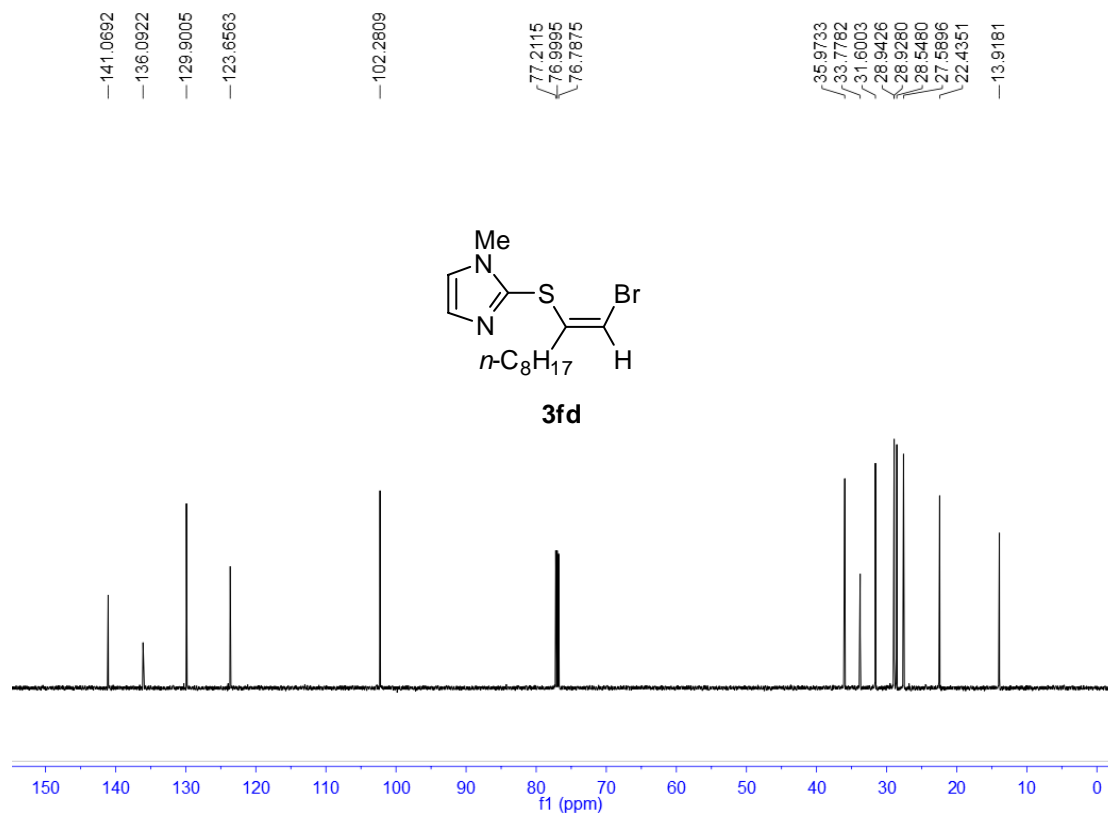

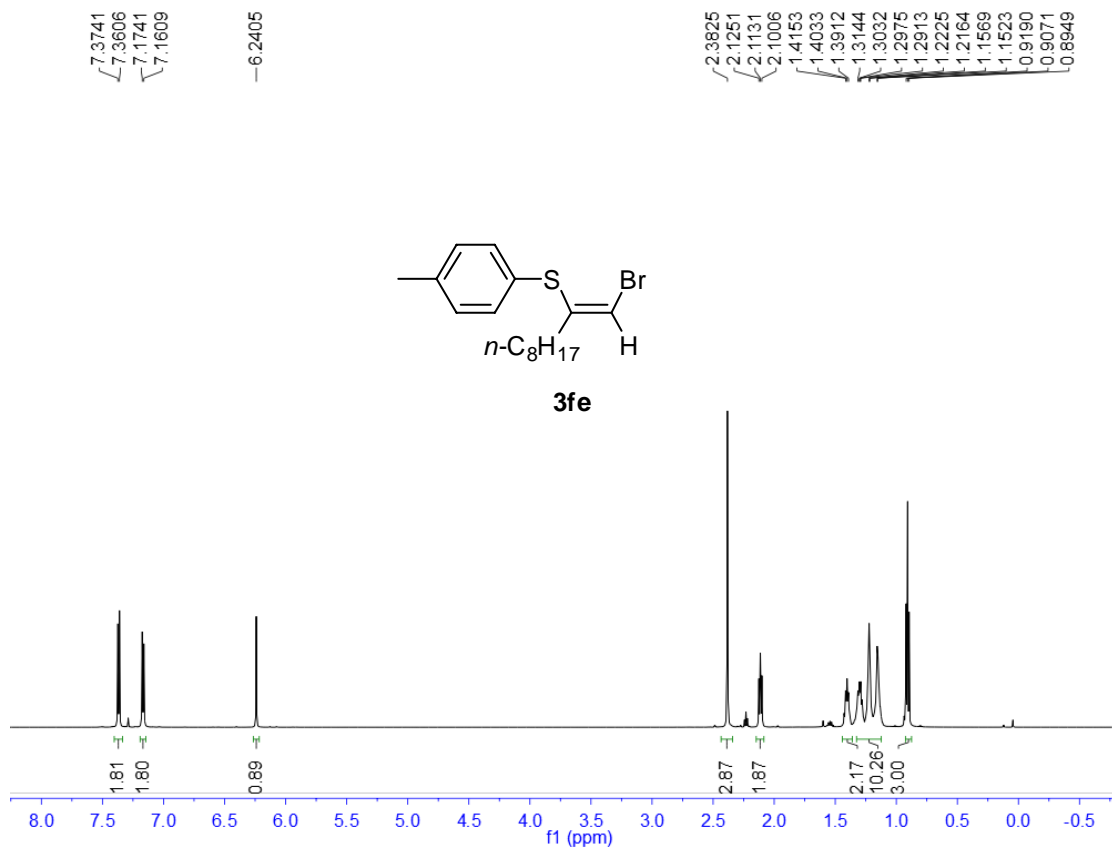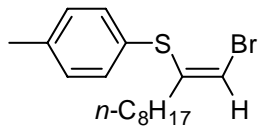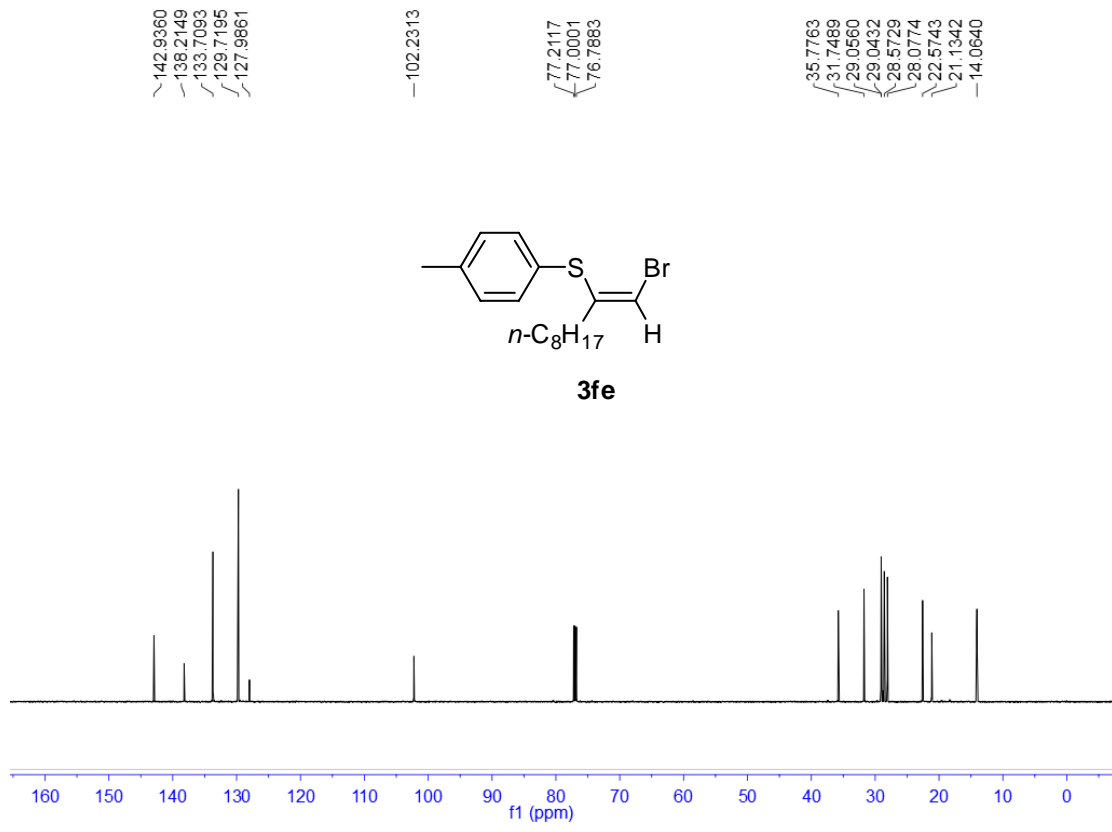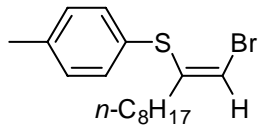

7.9691  
7.9488  
7.7947  
7.7747  
7.4708  
7.4526  
7.4322  
7.3687  
7.3504  
7.3306  
-6.7421

2.5592  
2.5409  
2.5219  
1.5778  
1.5612  
1.5433  
1.5255  
1.2638  
1.2208  
0.8773  
0.8607  
0.8430

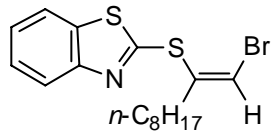

**3ff**

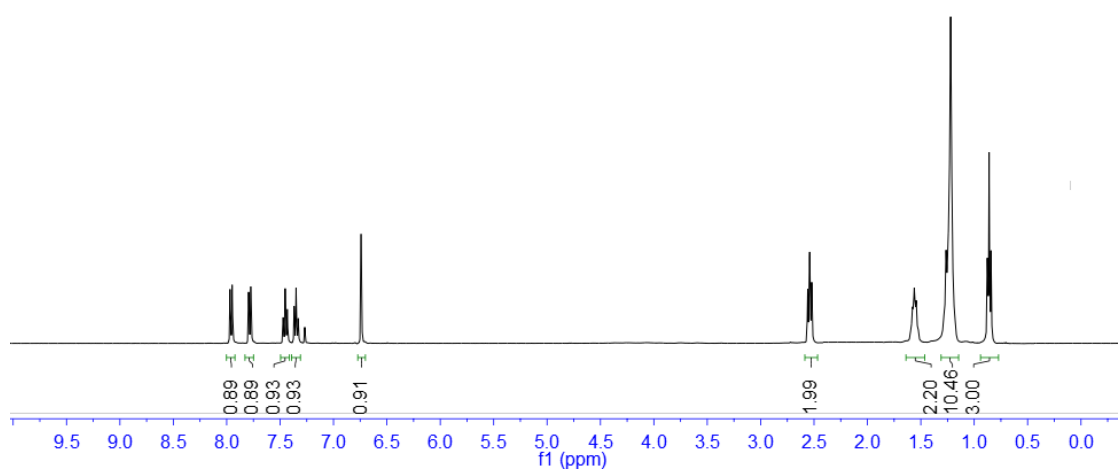

-162.9861  
-153.4922  
-139.2010  
-136.0671  
-126.2410  
-124.8775  
-122.3353  
-120.9493  
-112.8676  
77.3174  
76.9999  
76.6822  
37.7040  
31.7120  
29.0965  
29.0428  
28.6499  
28.1462  
22.5467  
-14.0279

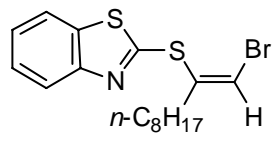

**3ff**

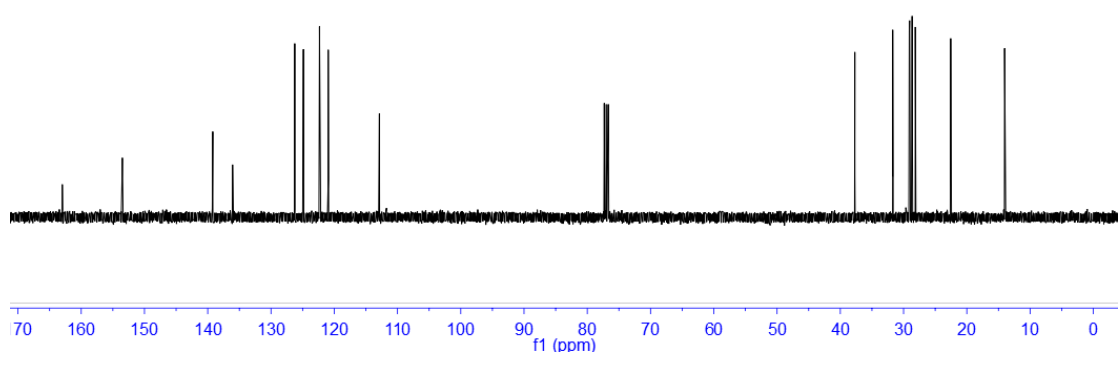

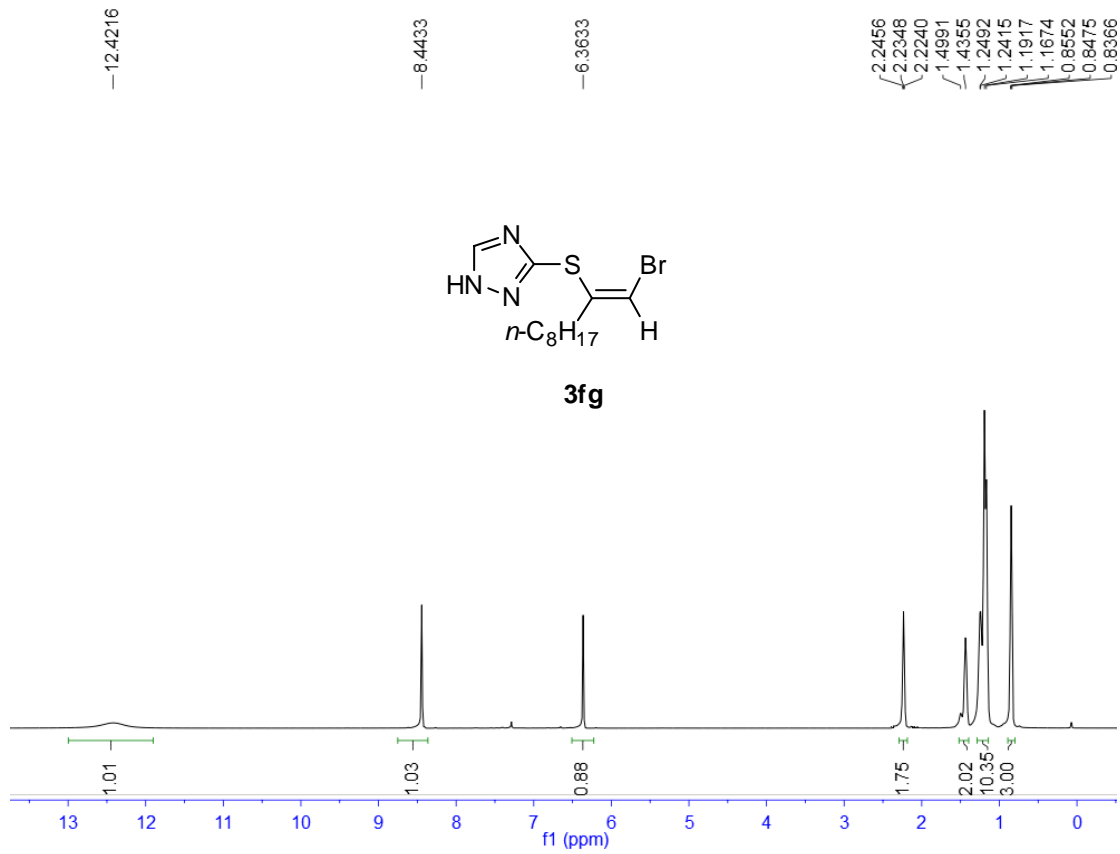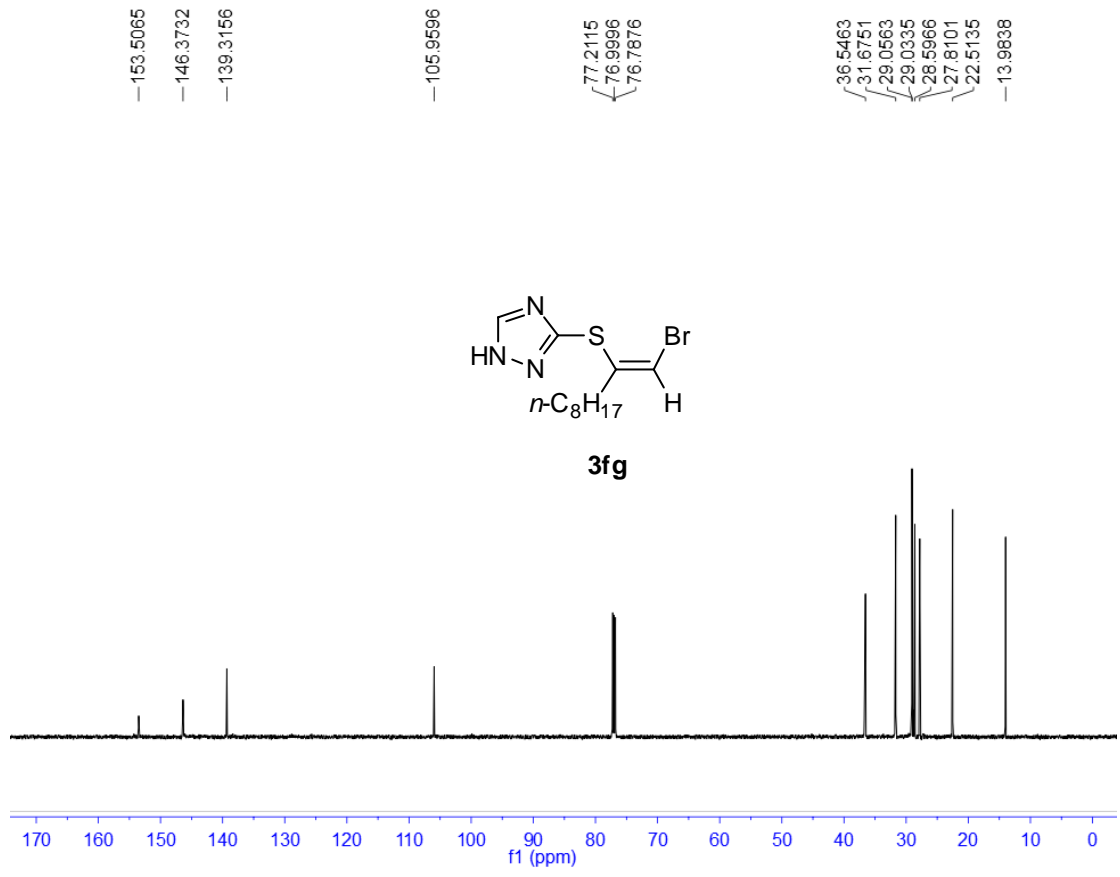



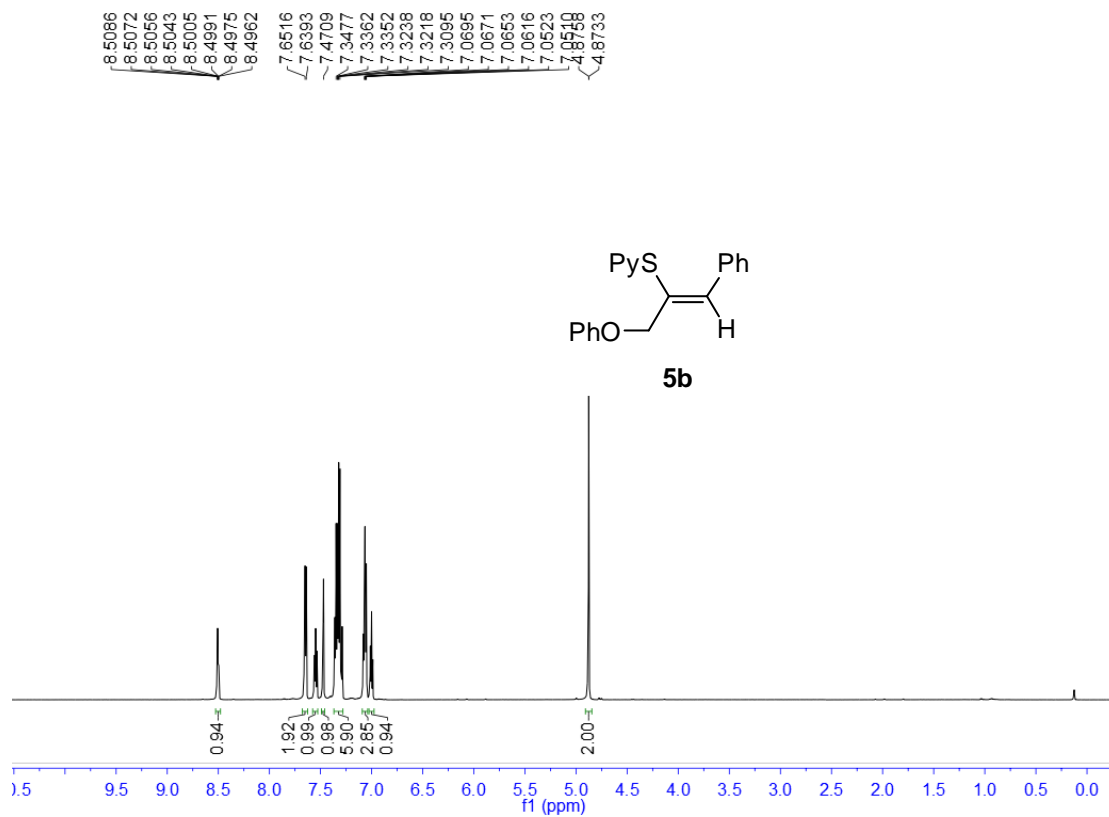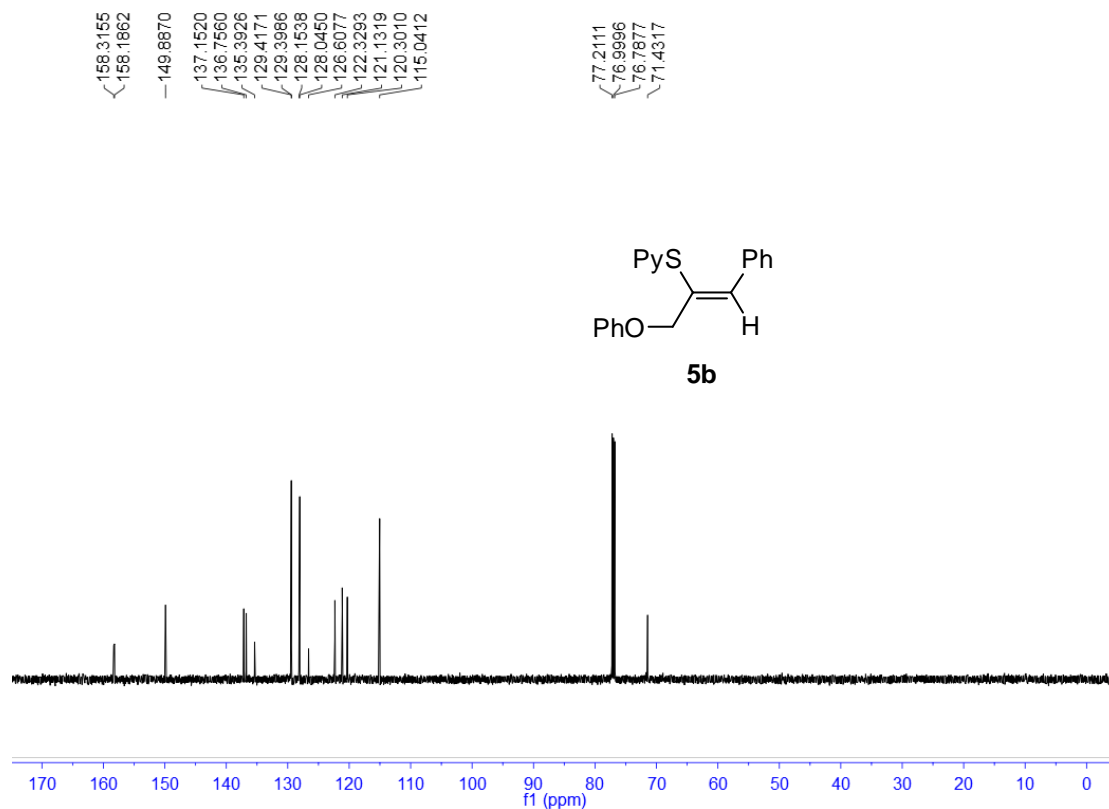



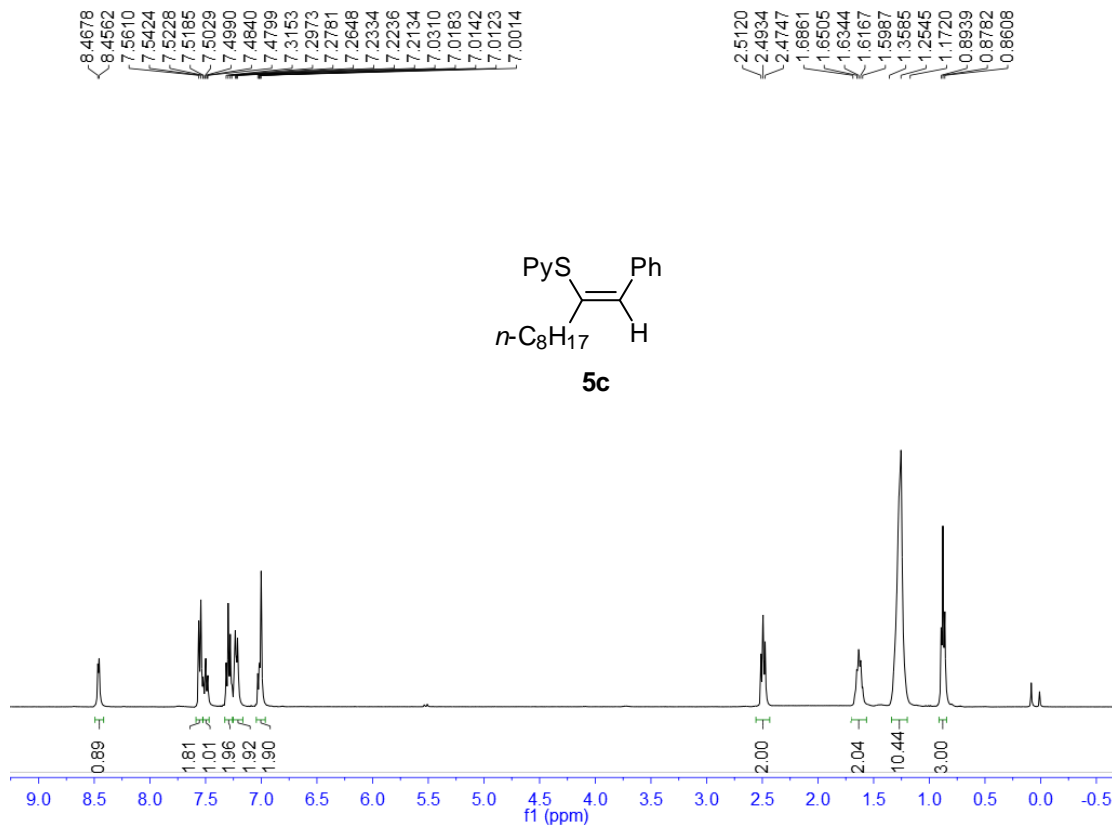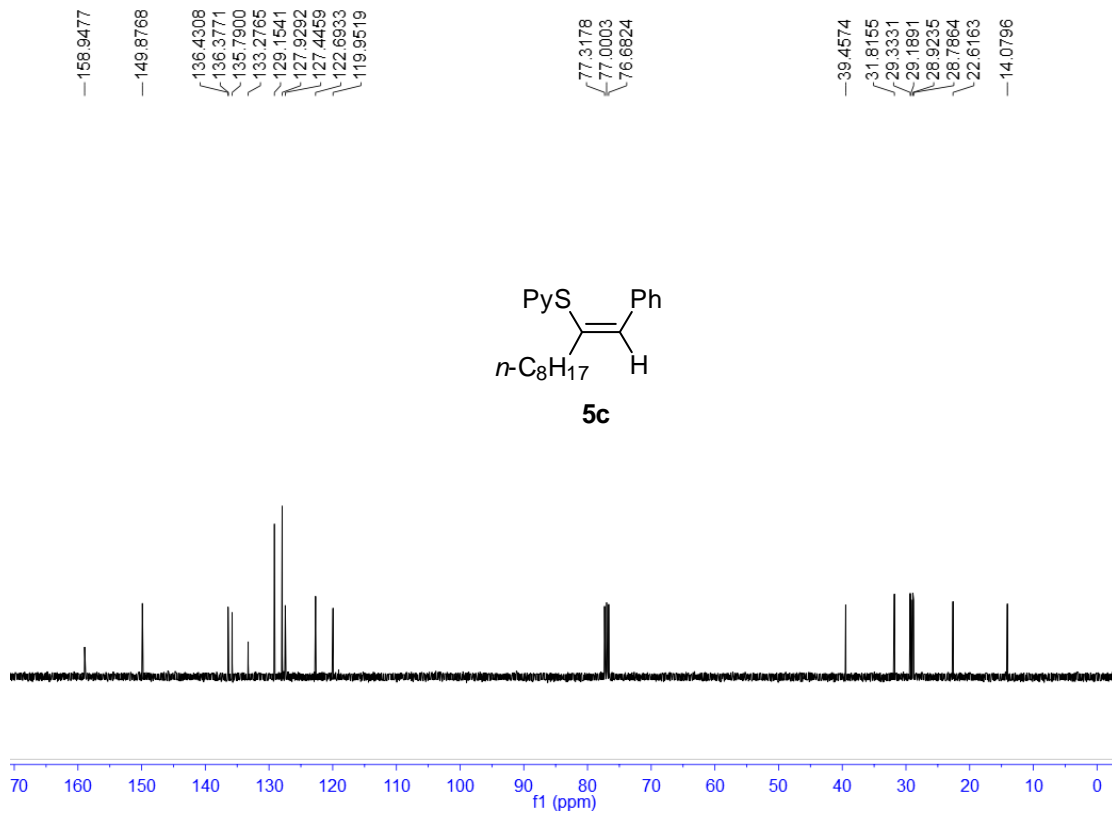

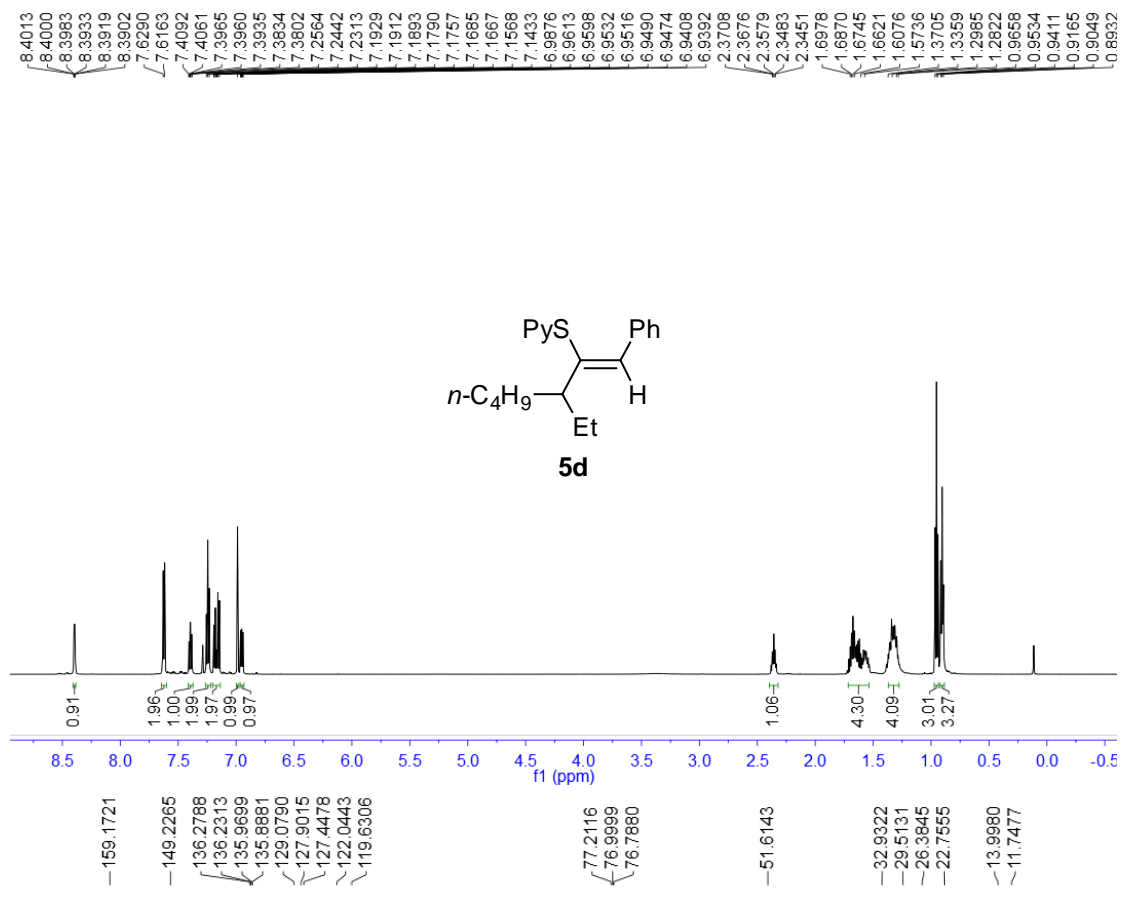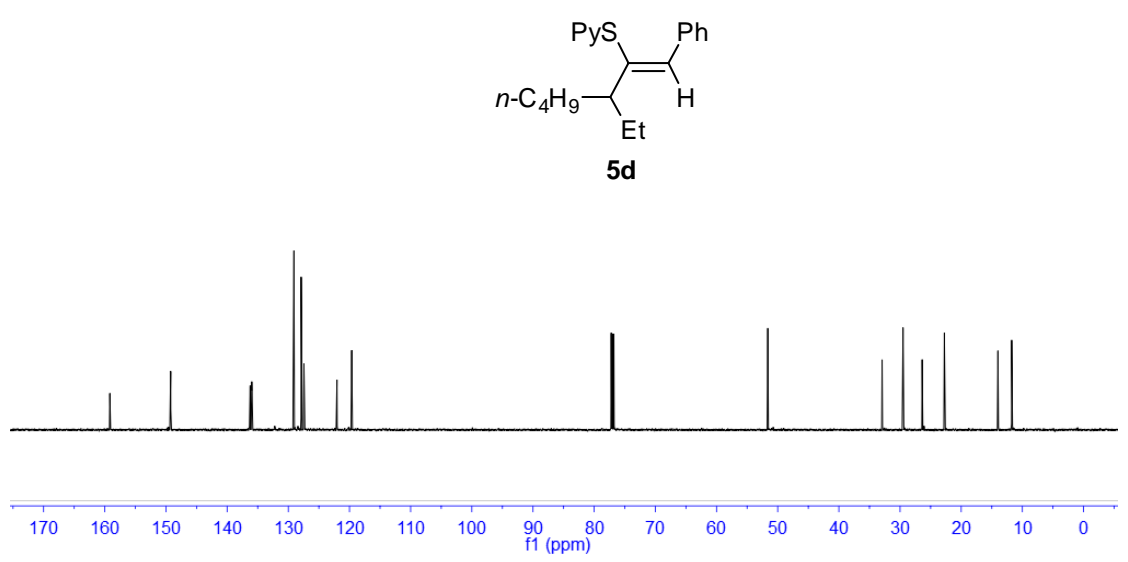

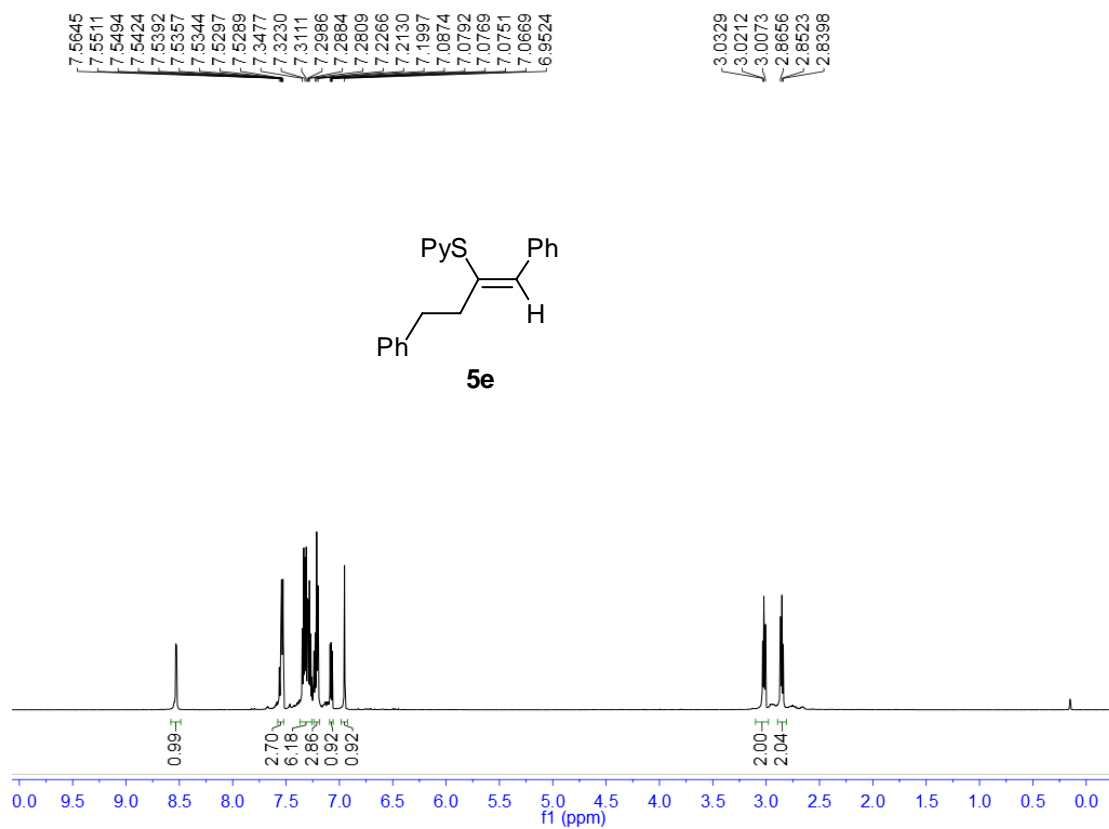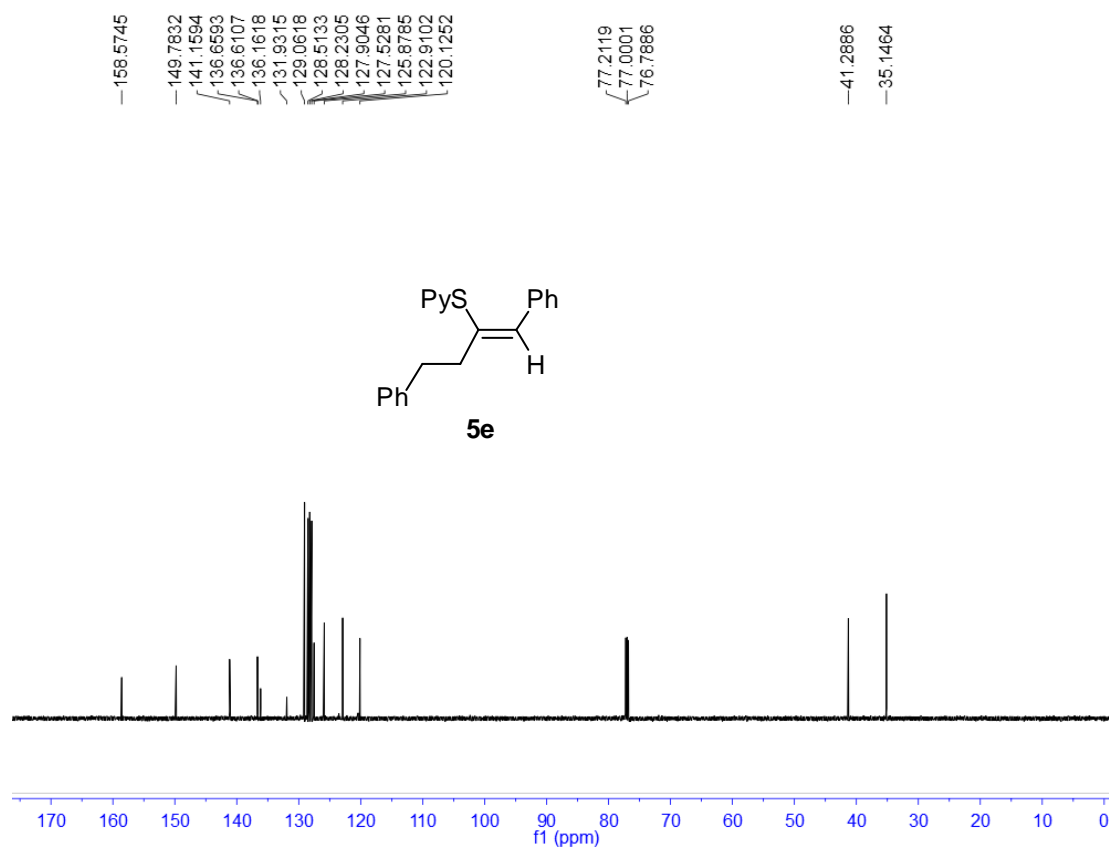

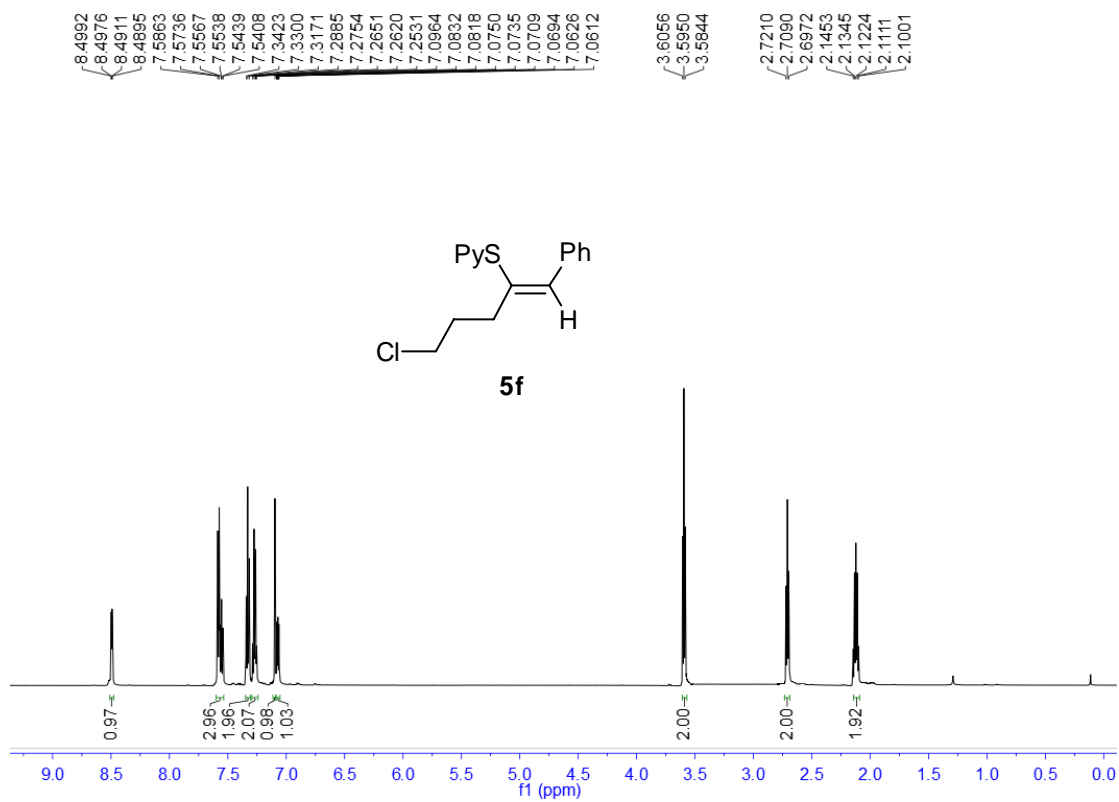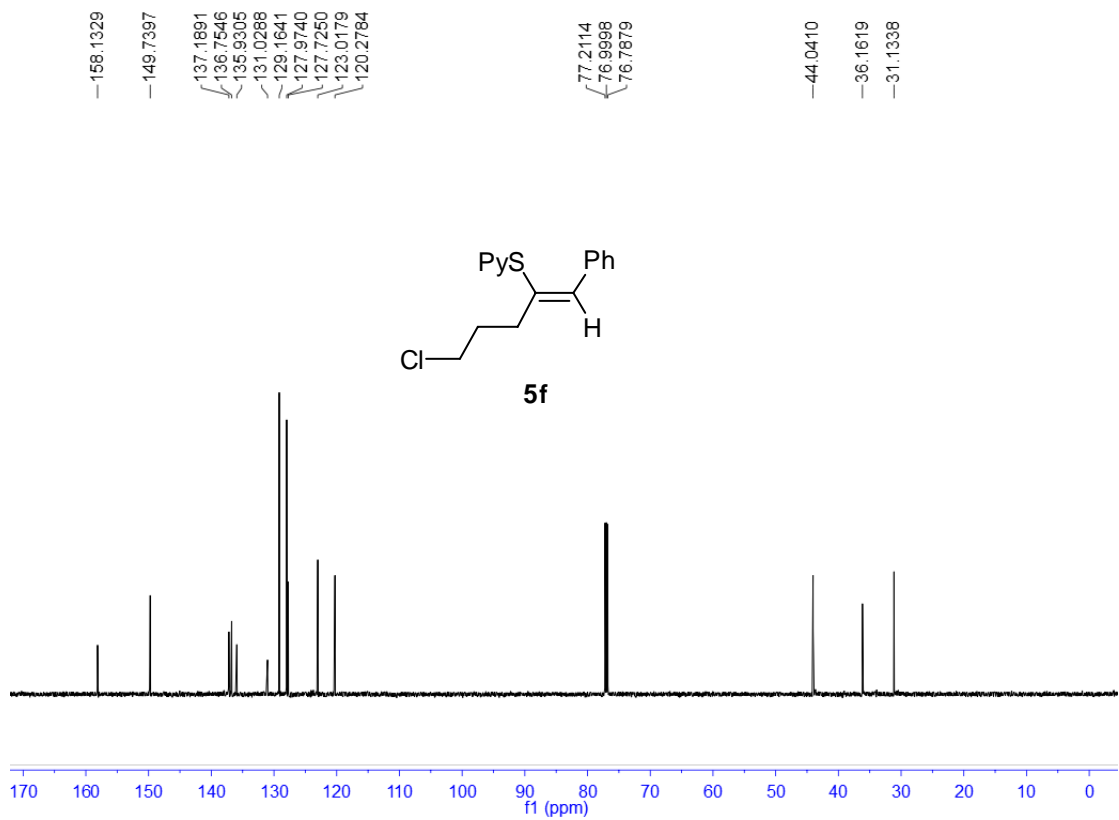

8.4218  
8.4151  
7.6236  
7.6109  
7.4714  
7.4689  
7.4587  
7.4558  
7.4426  
7.3143  
7.3019  
7.2889  
7.2447  
7.2325  
7.2075  
7.0854  
7.0720  
6.9925  
6.9841  
6.9809  
6.9723  
6.5626  
6.5563  
6.5498  
2.4276  
2.4256  
2.4182  
2.1453  
2.1421  
2.1390  
1.7295  
1.7239  
1.7199  
1.7143  
1.7100  
1.6003  
1.5960  
1.5904  
1.5863  
1.5809

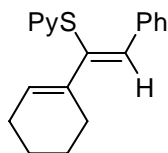

**5g**

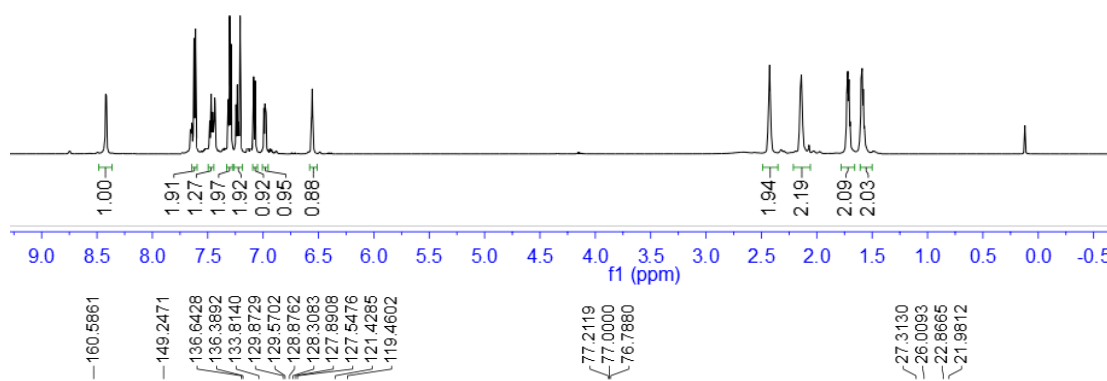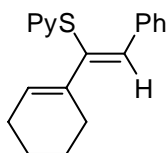

**5g**

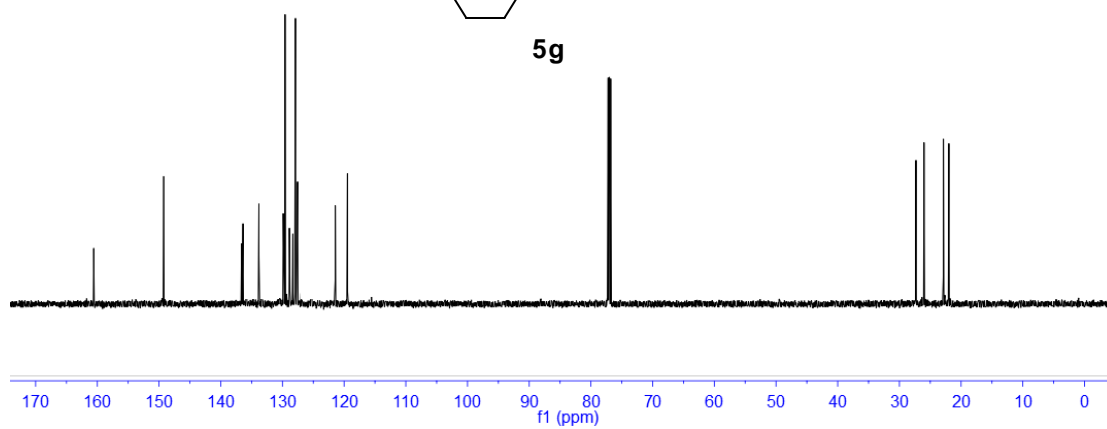

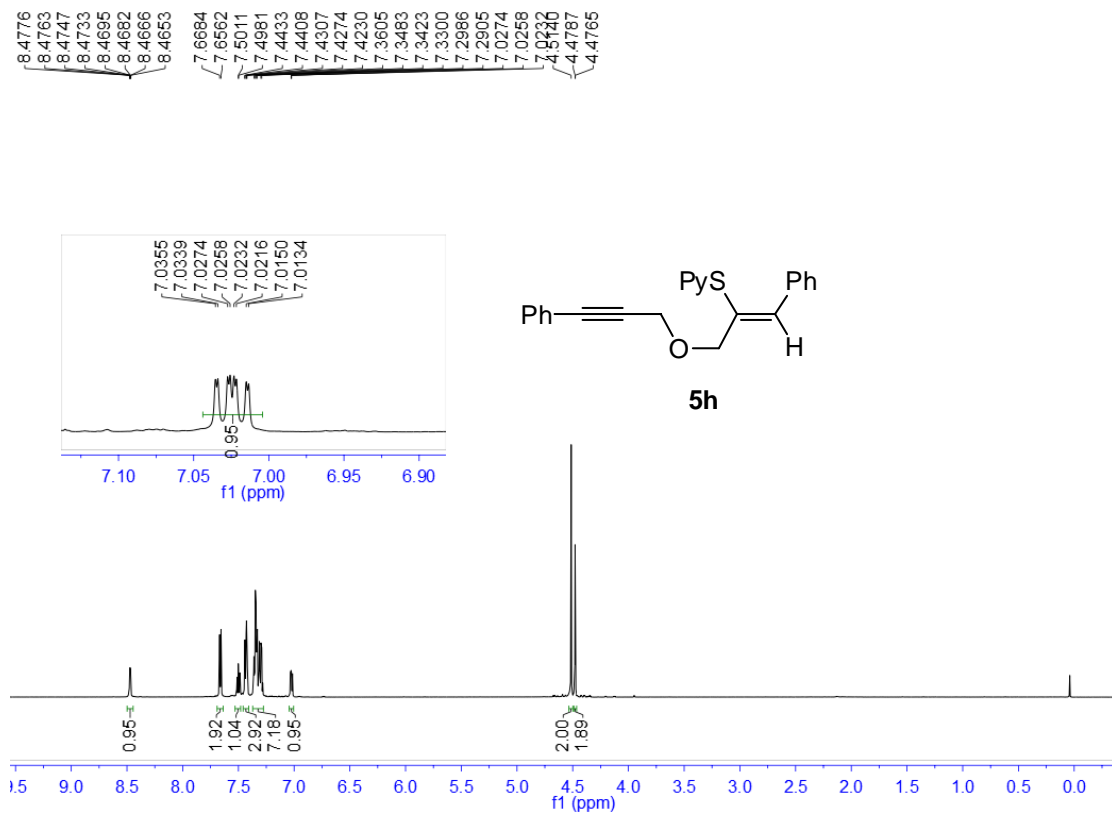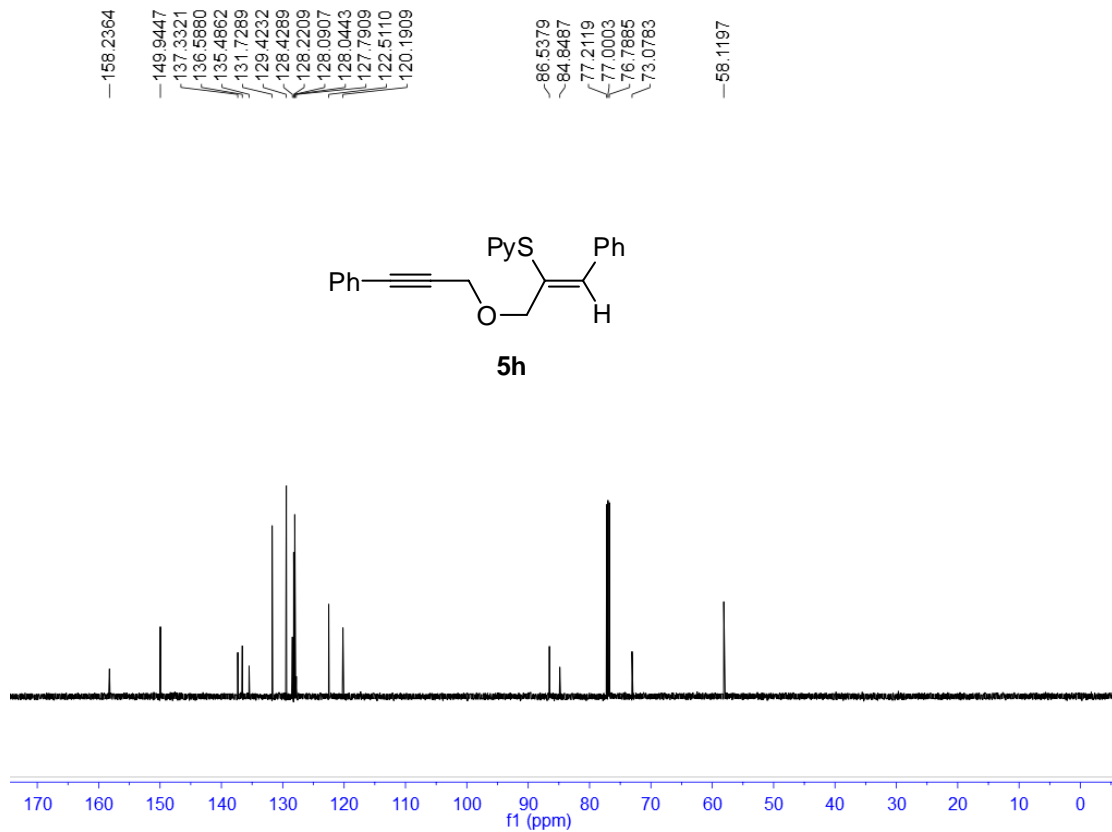

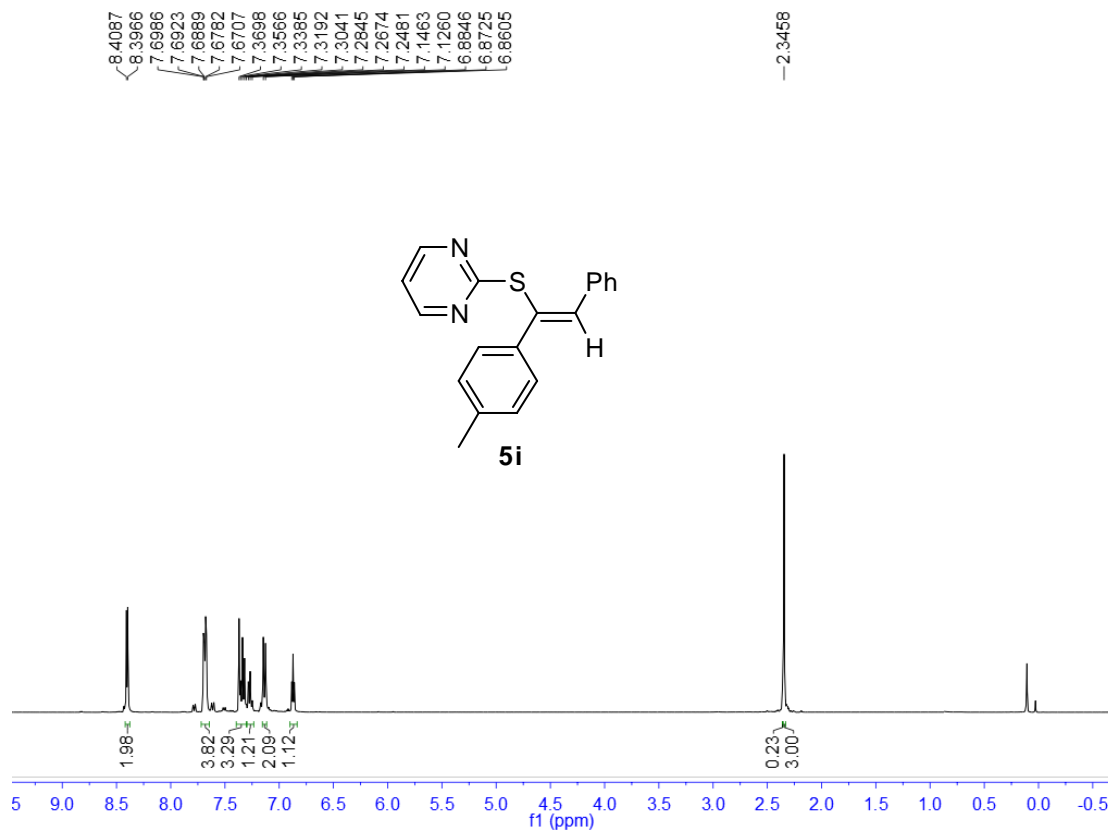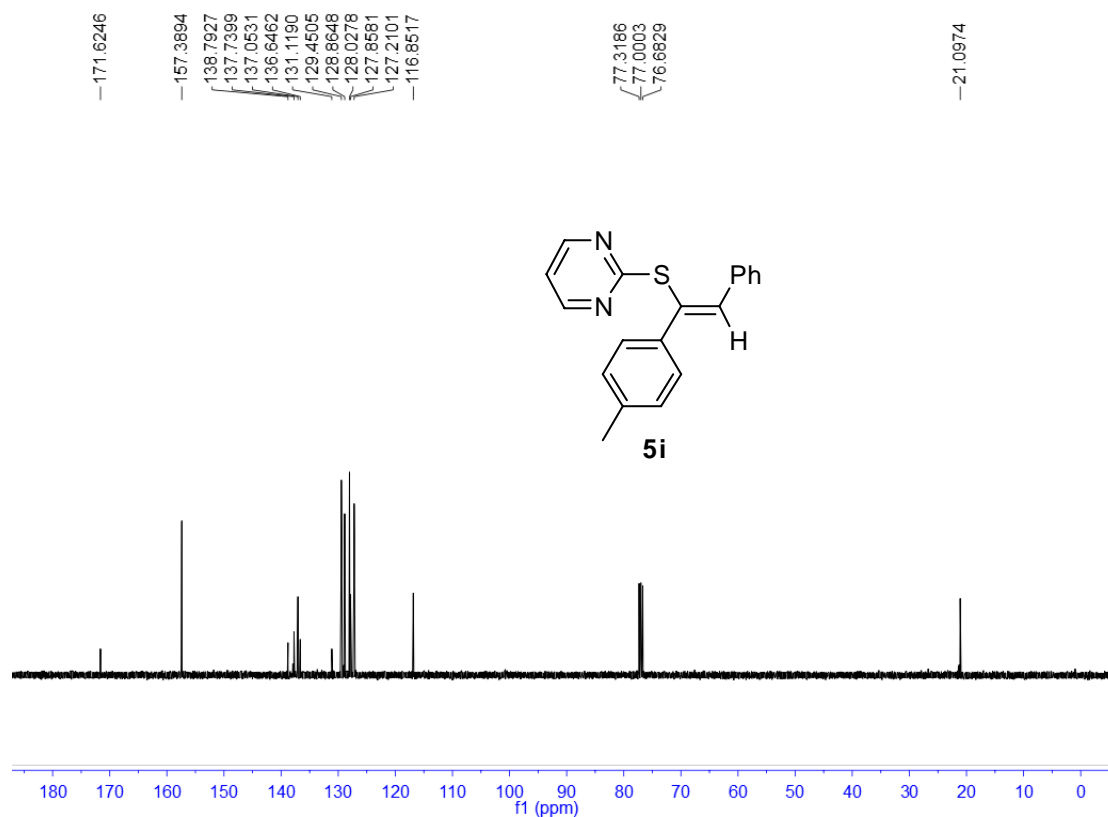

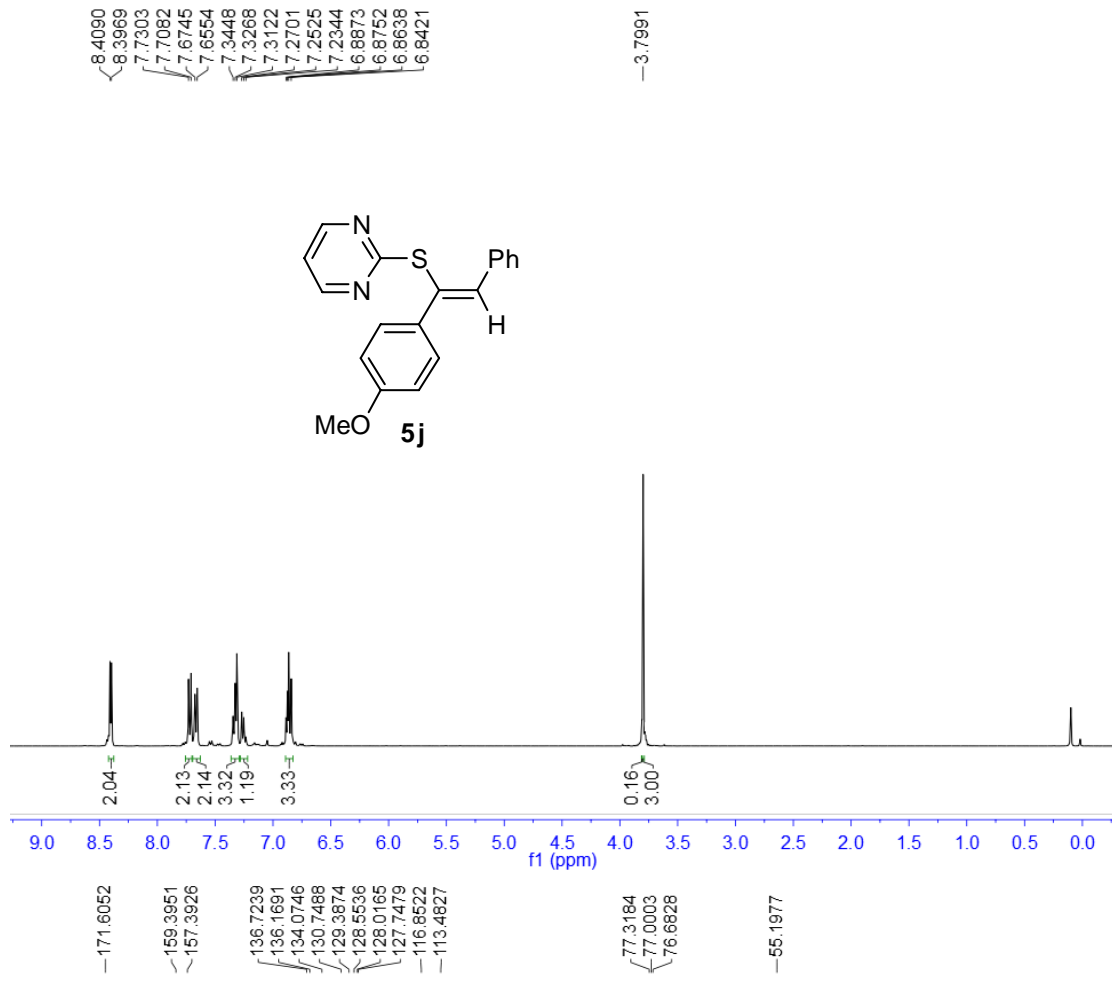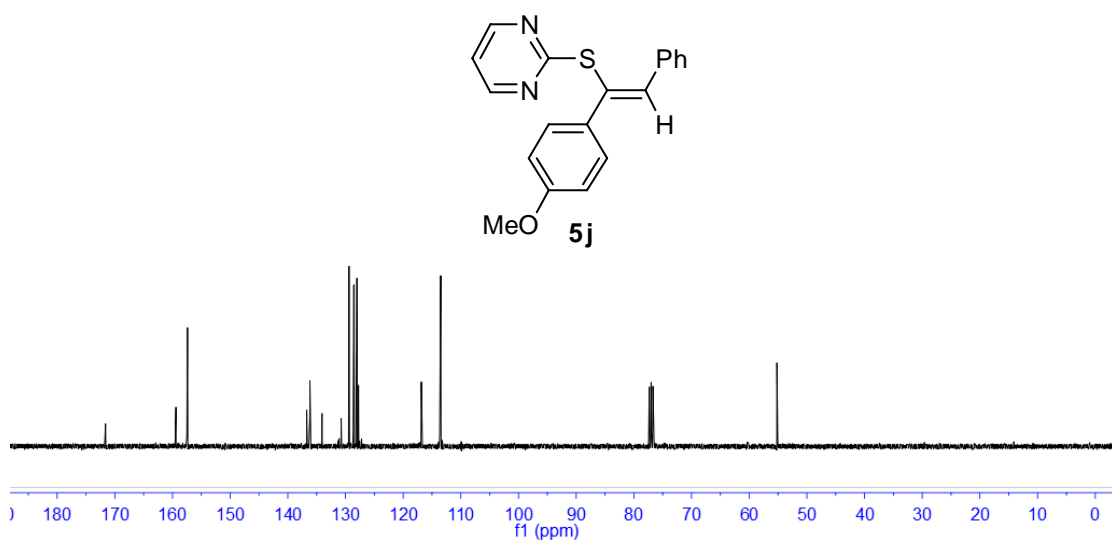



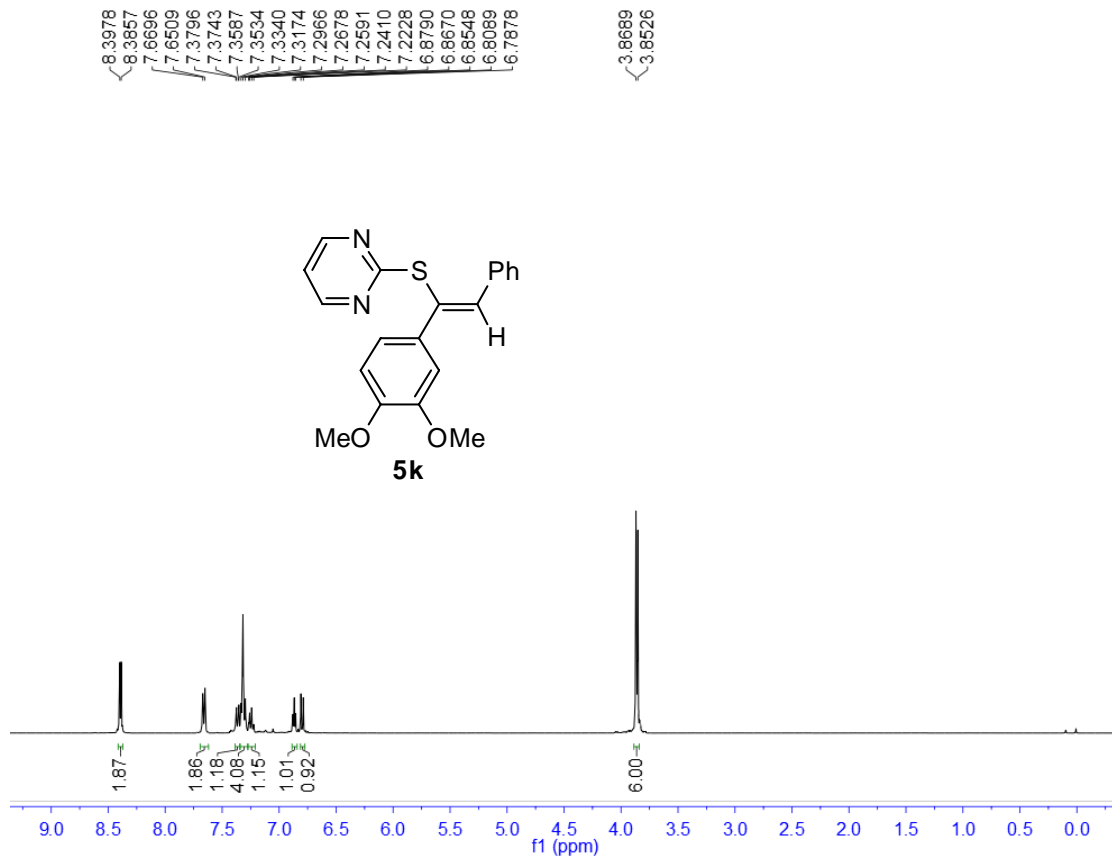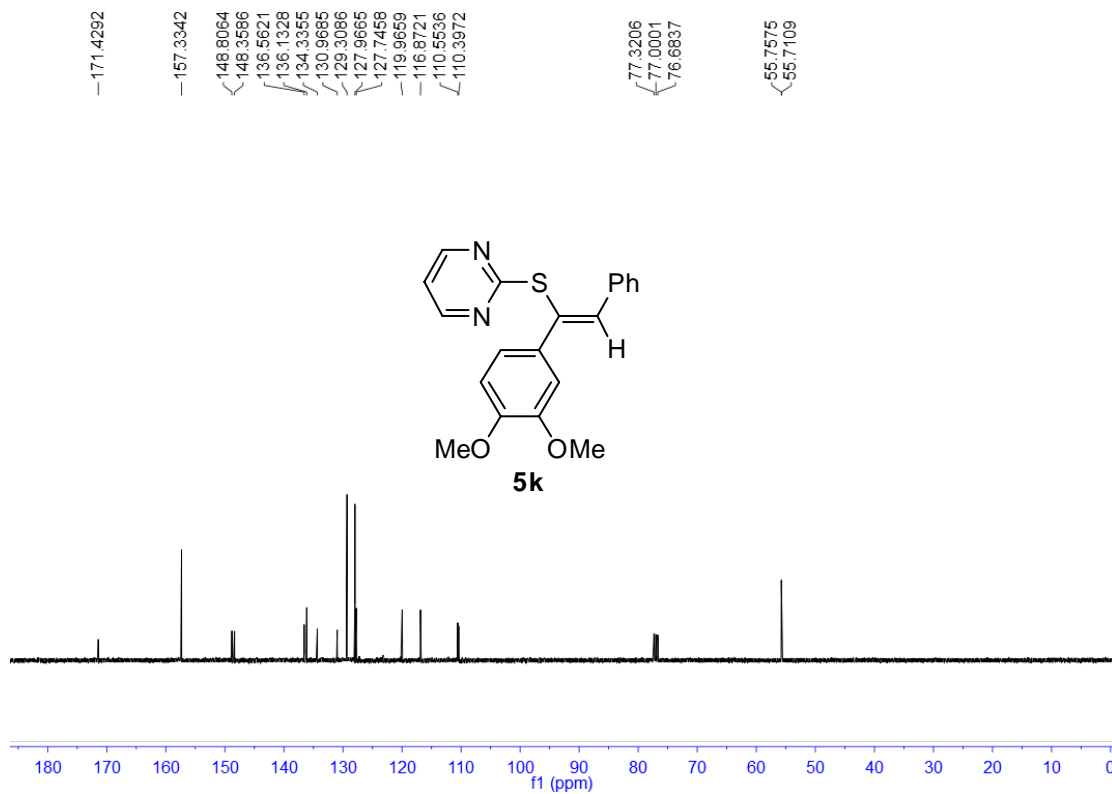

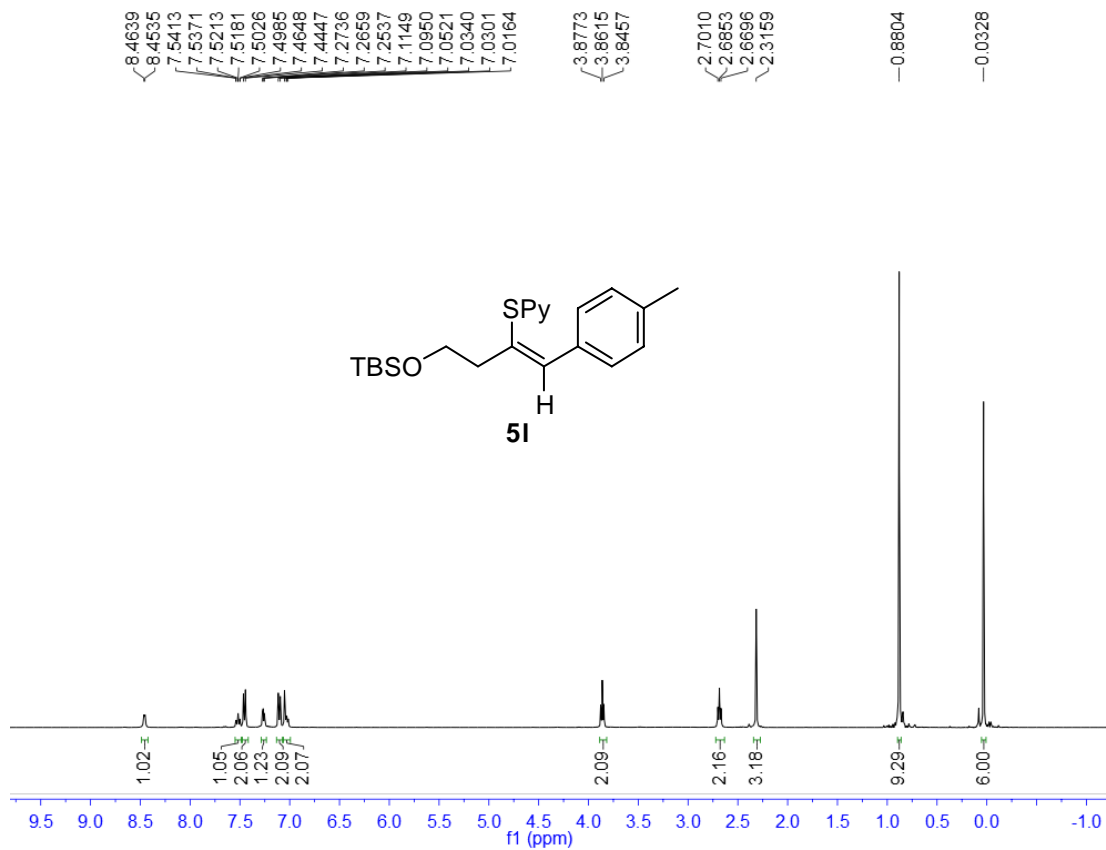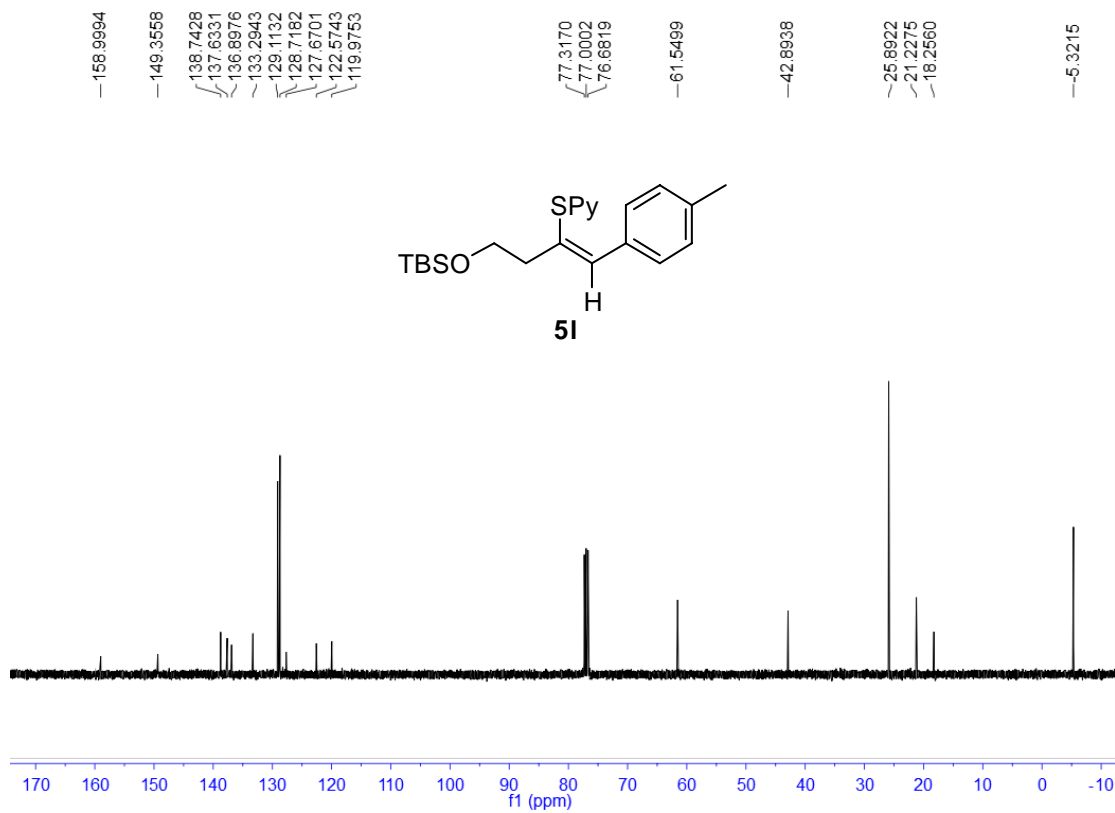

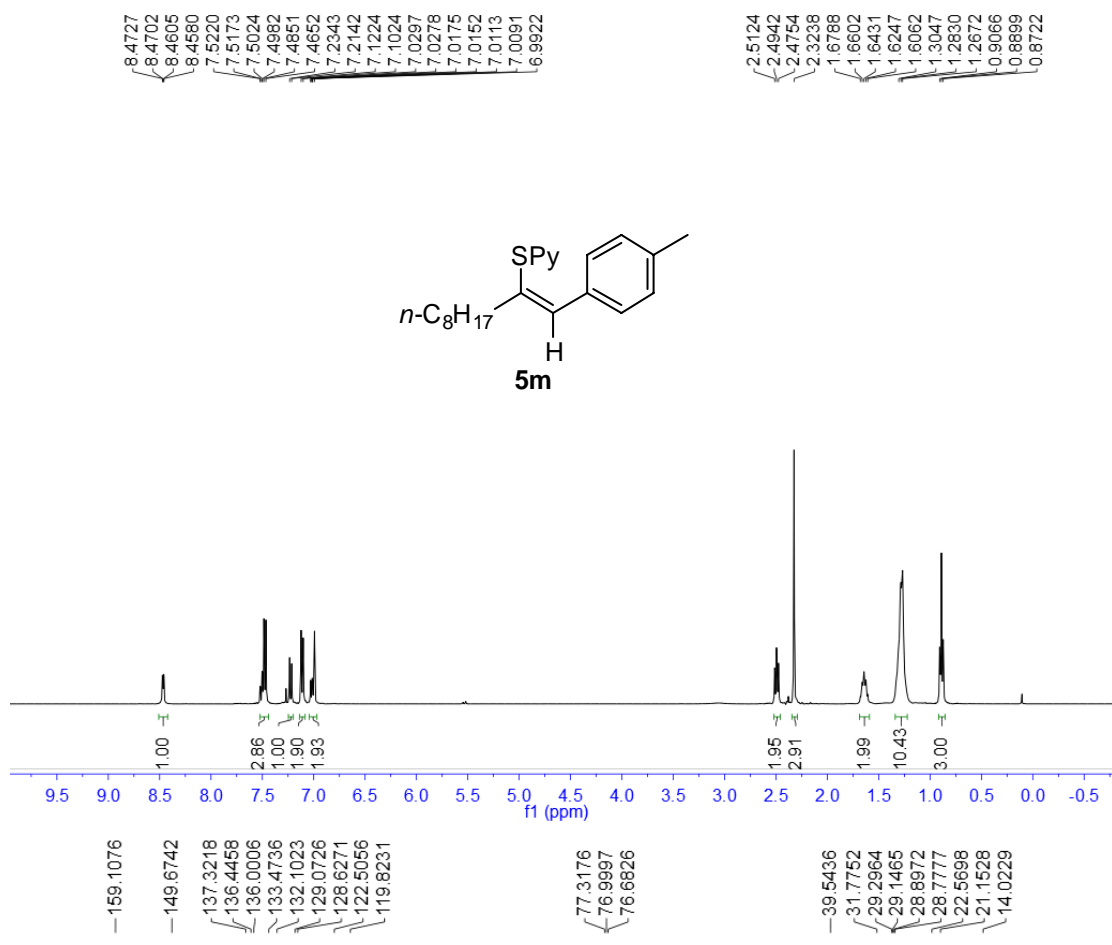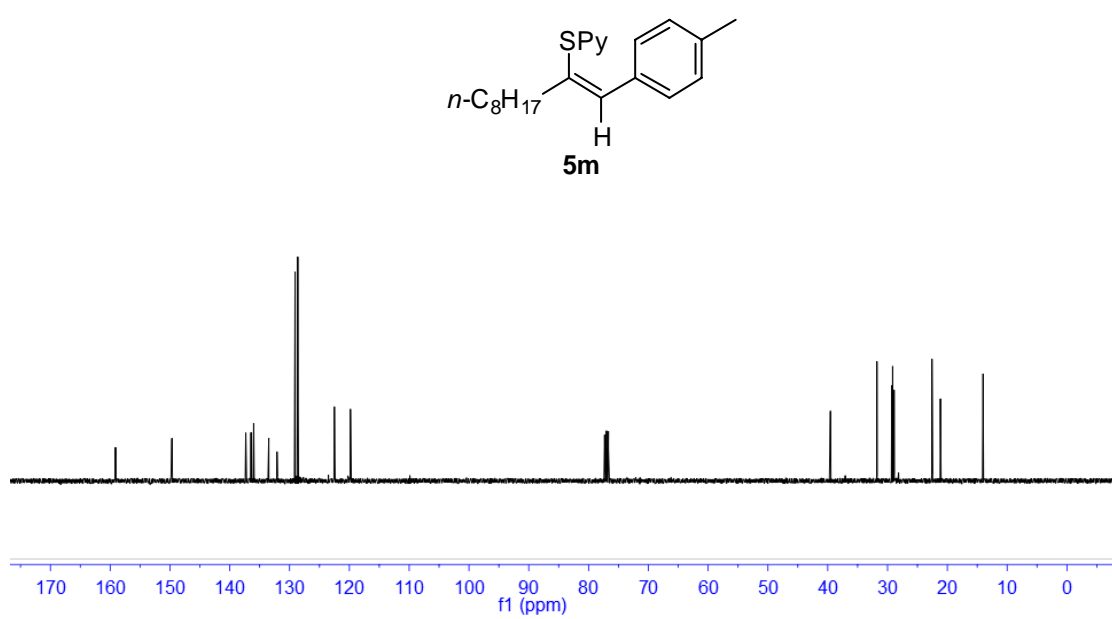

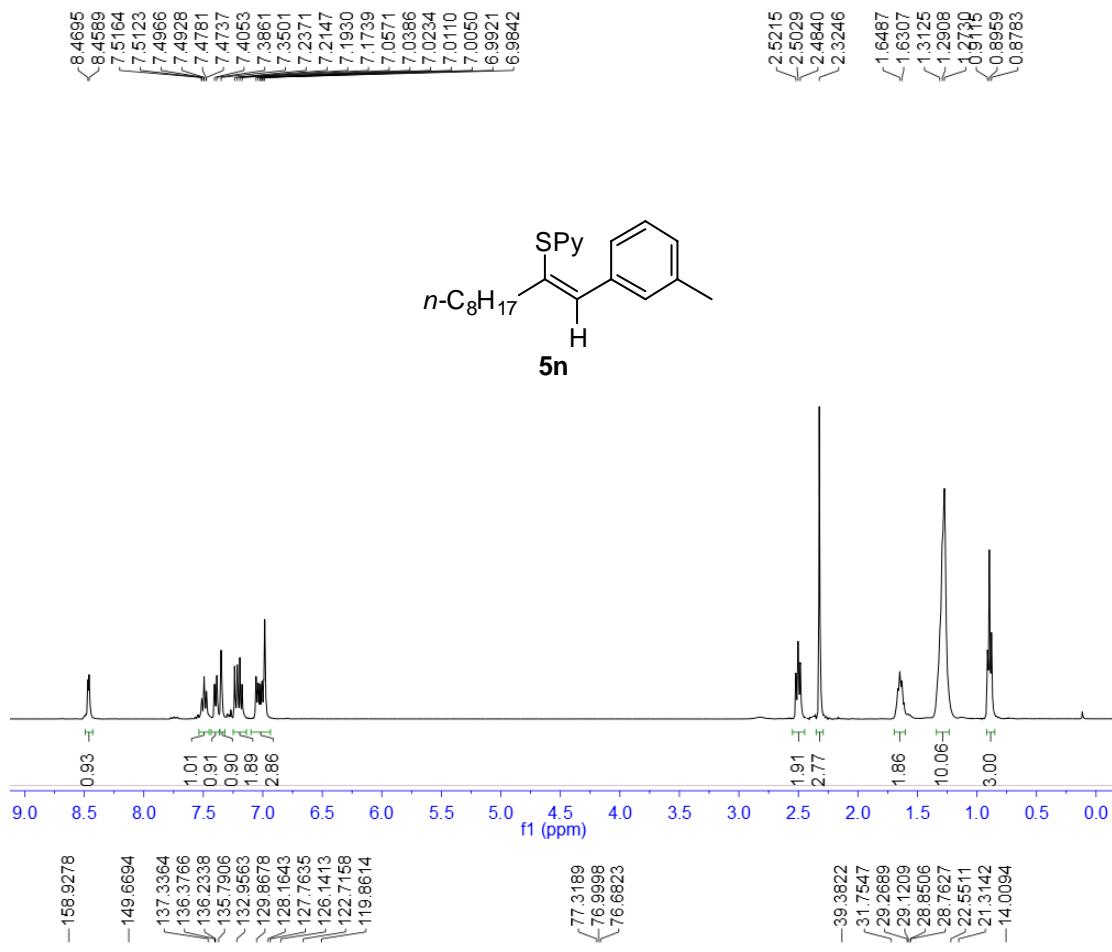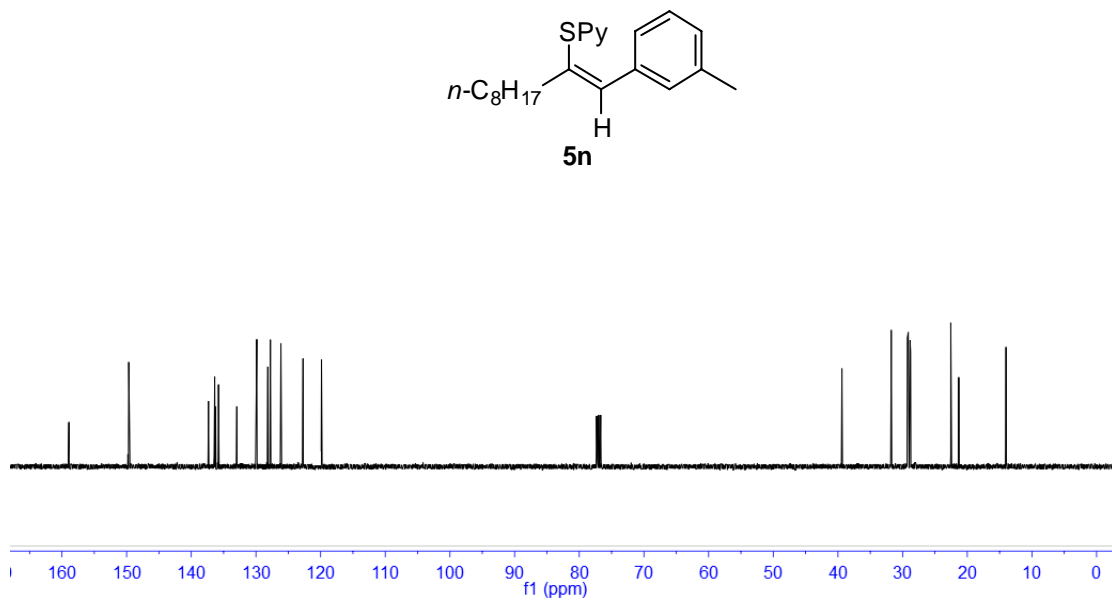

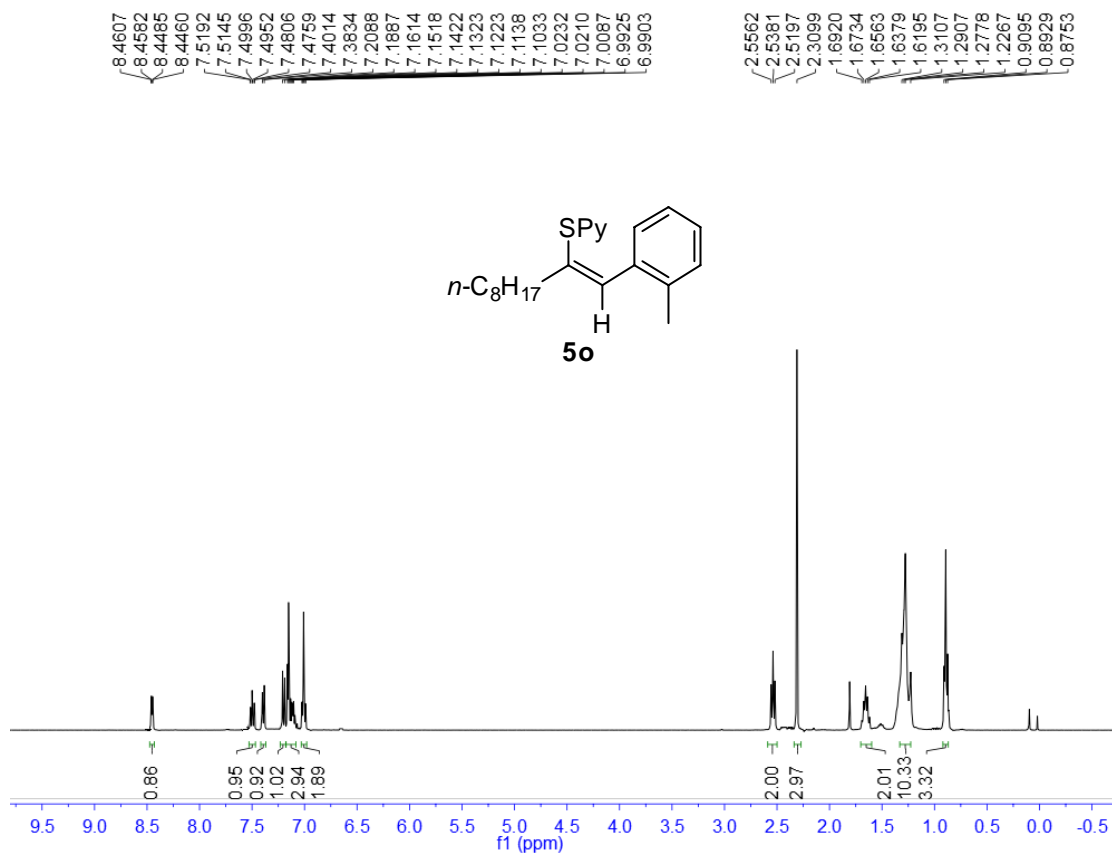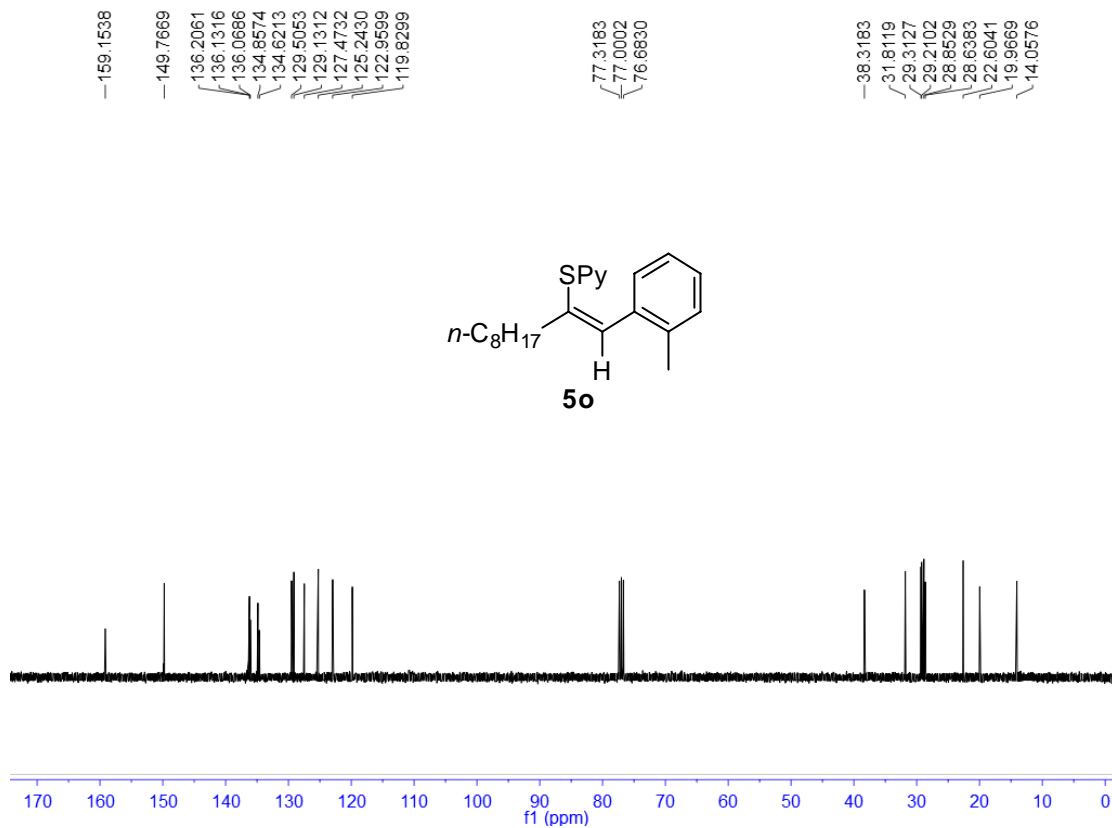

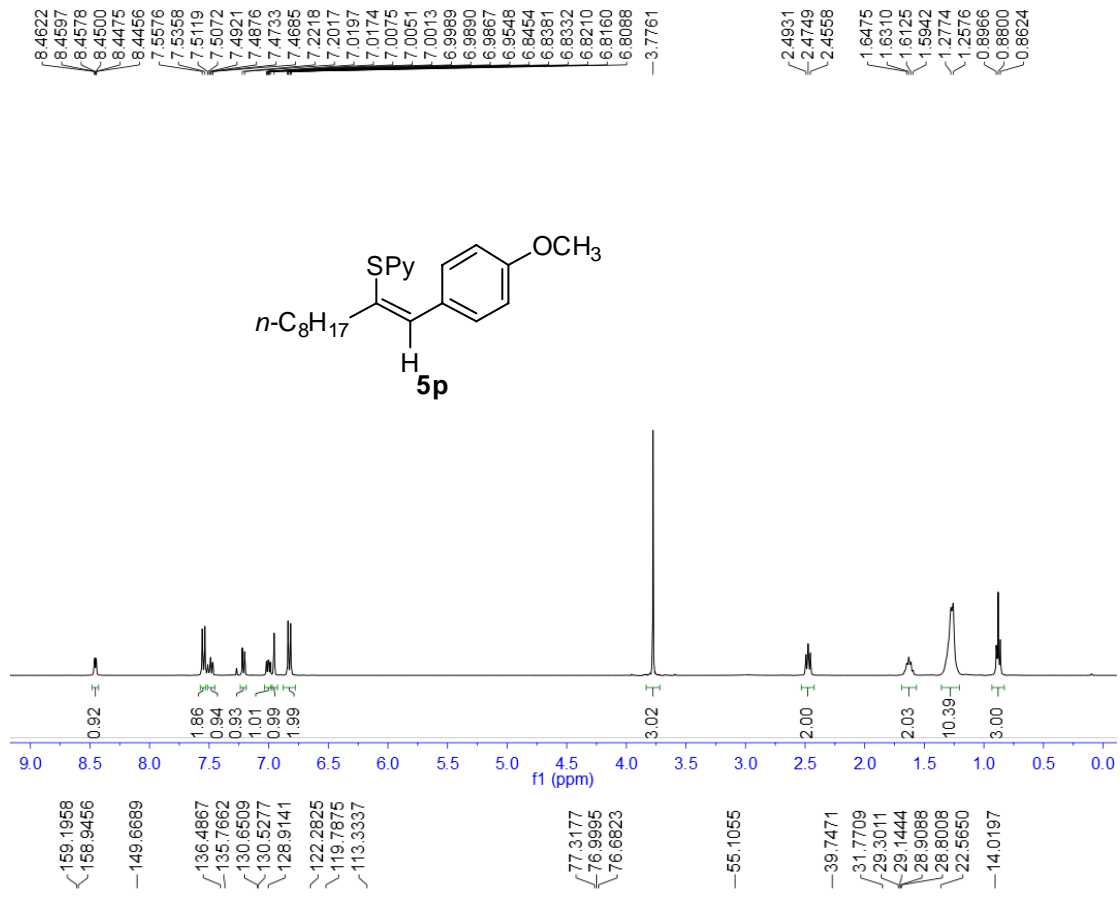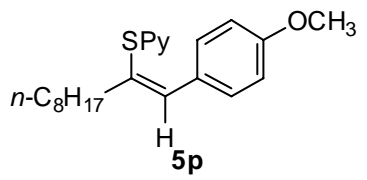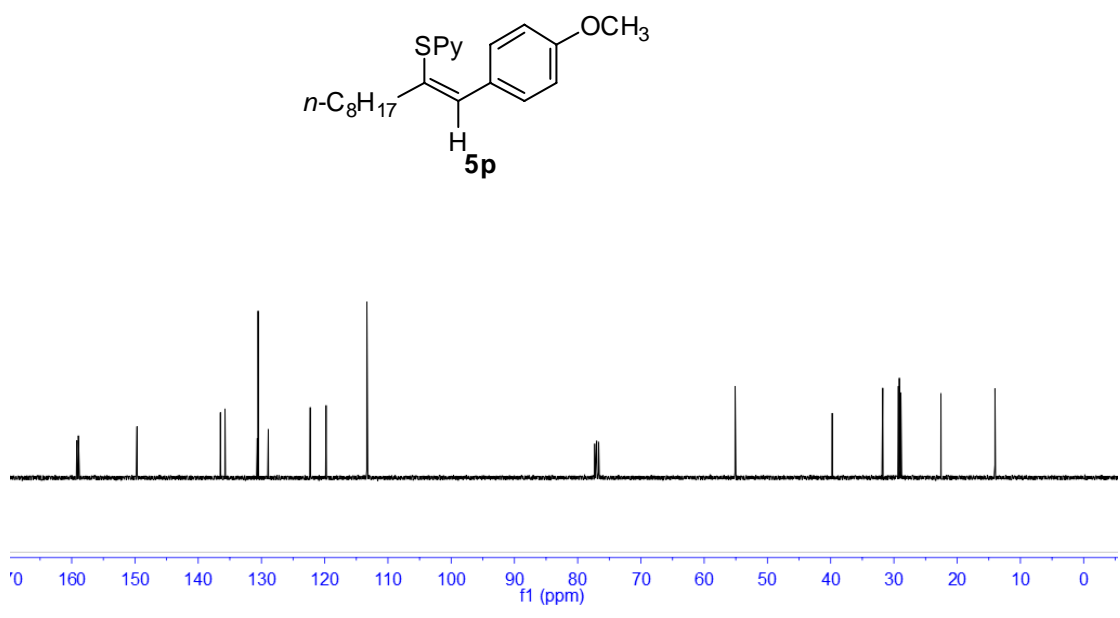

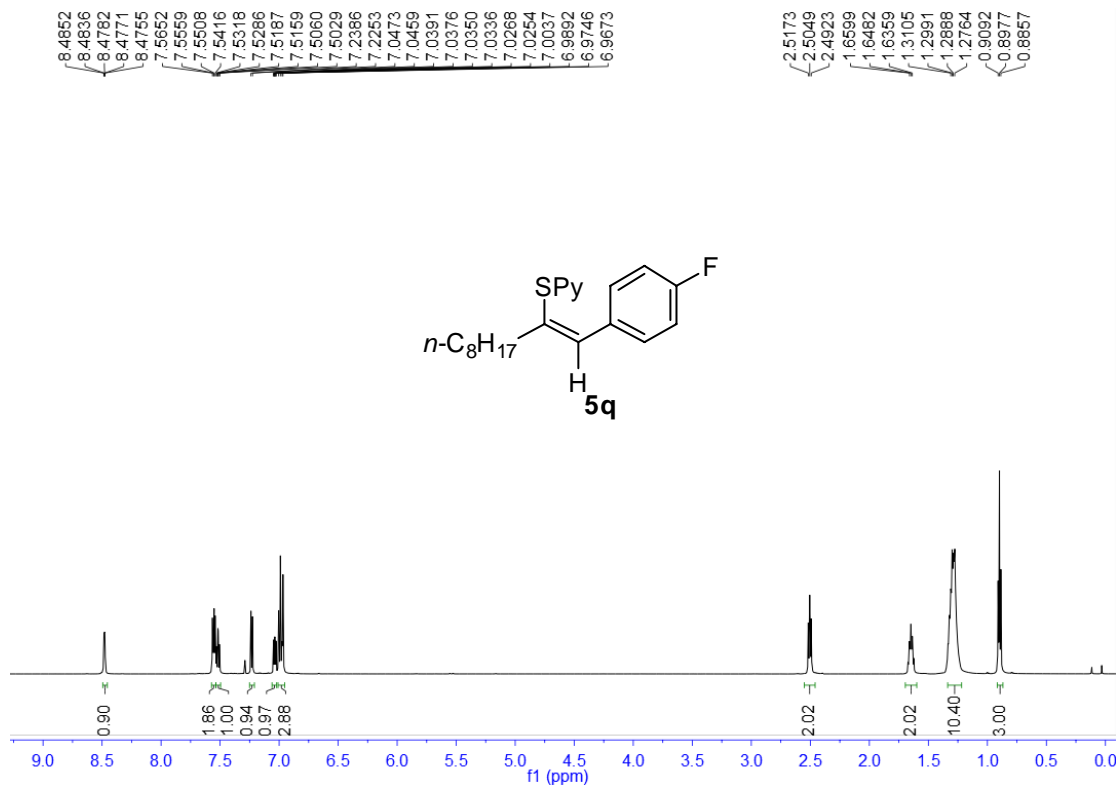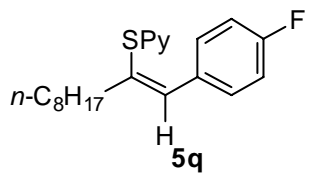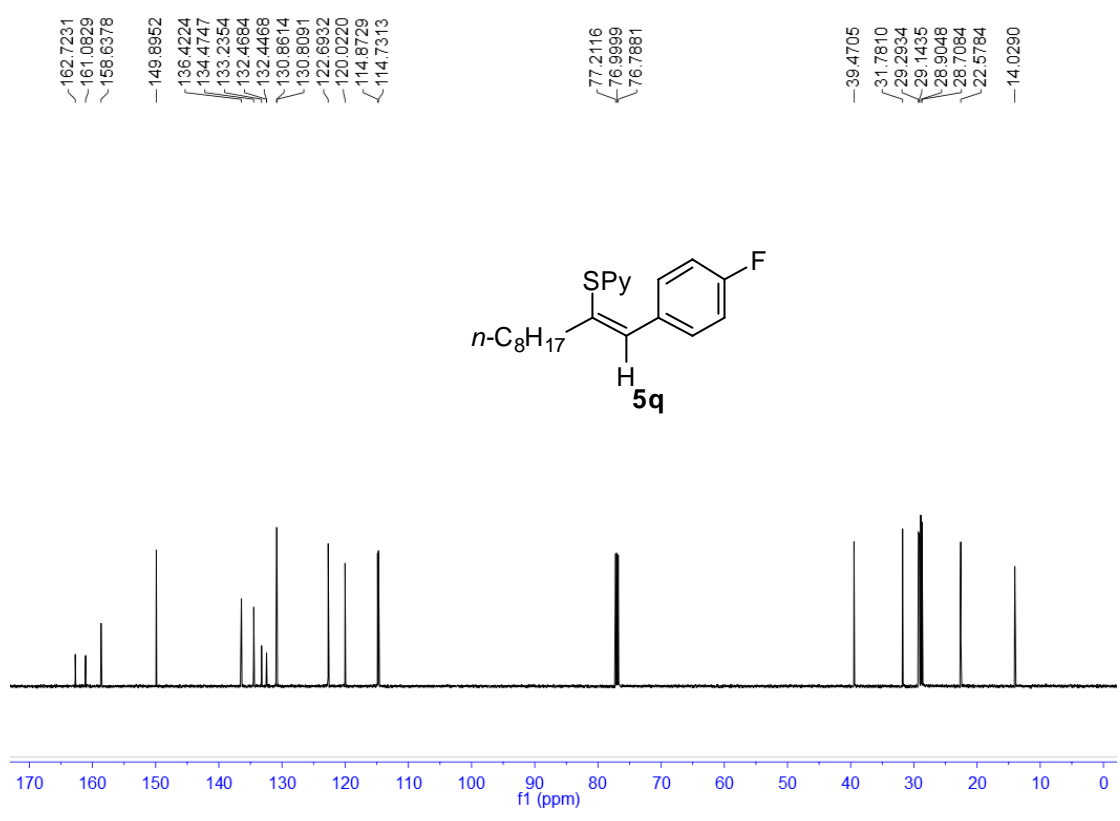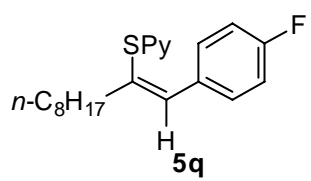

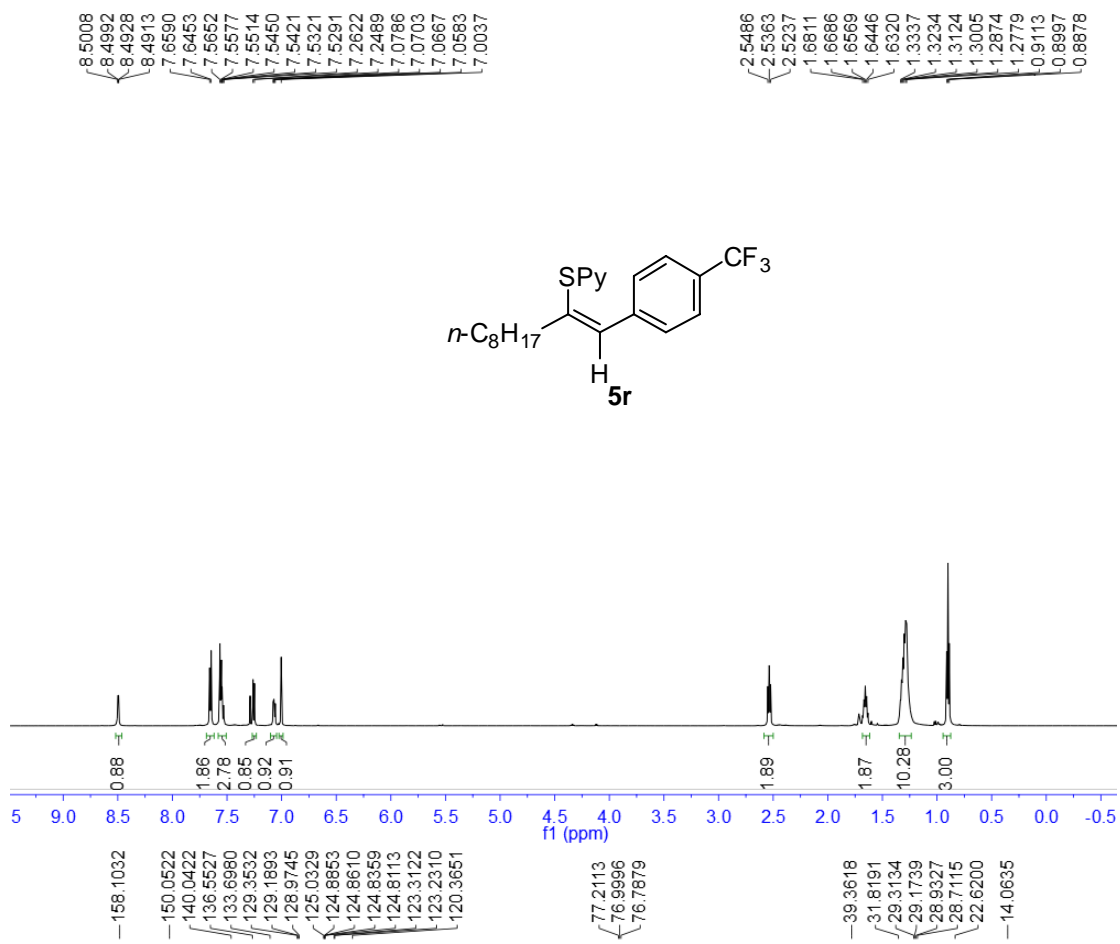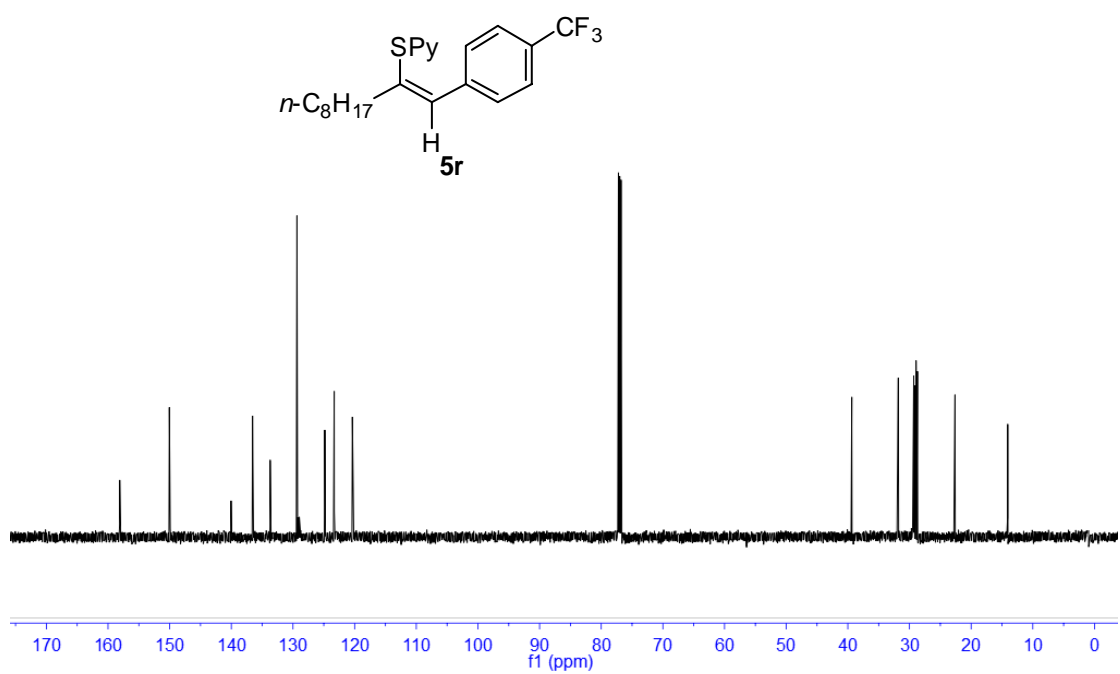



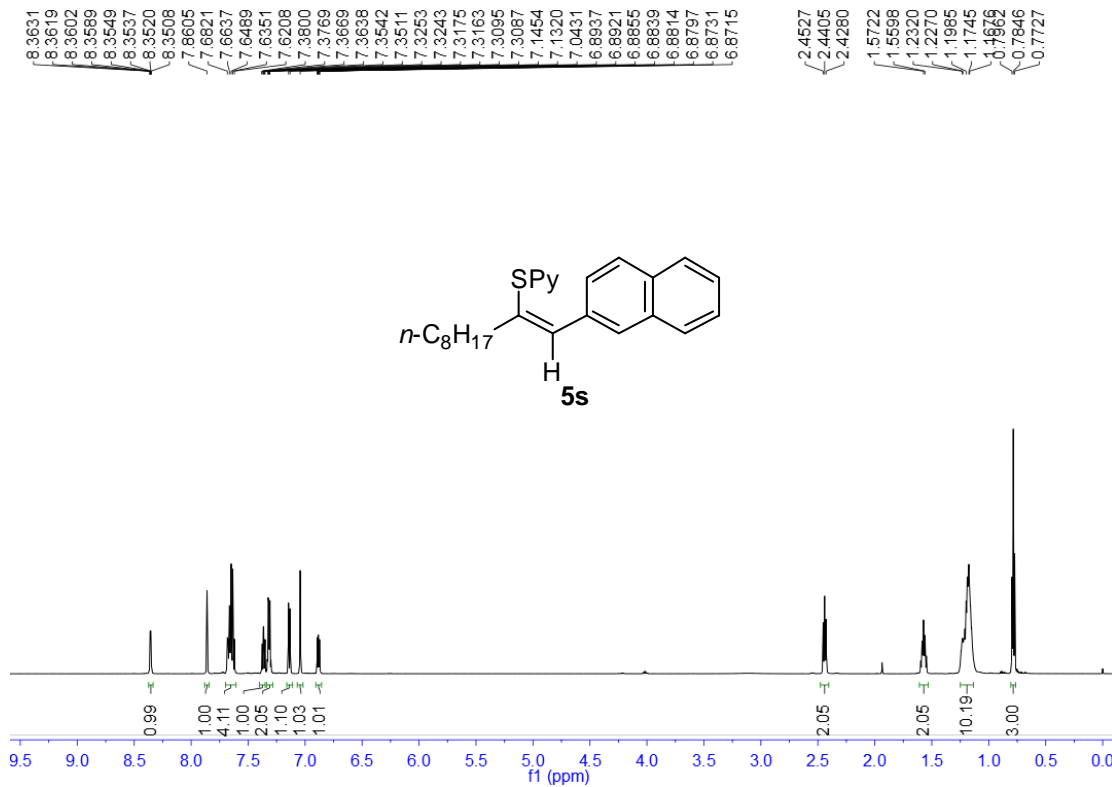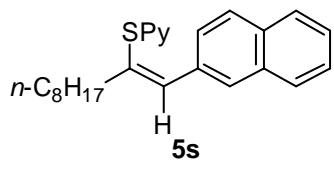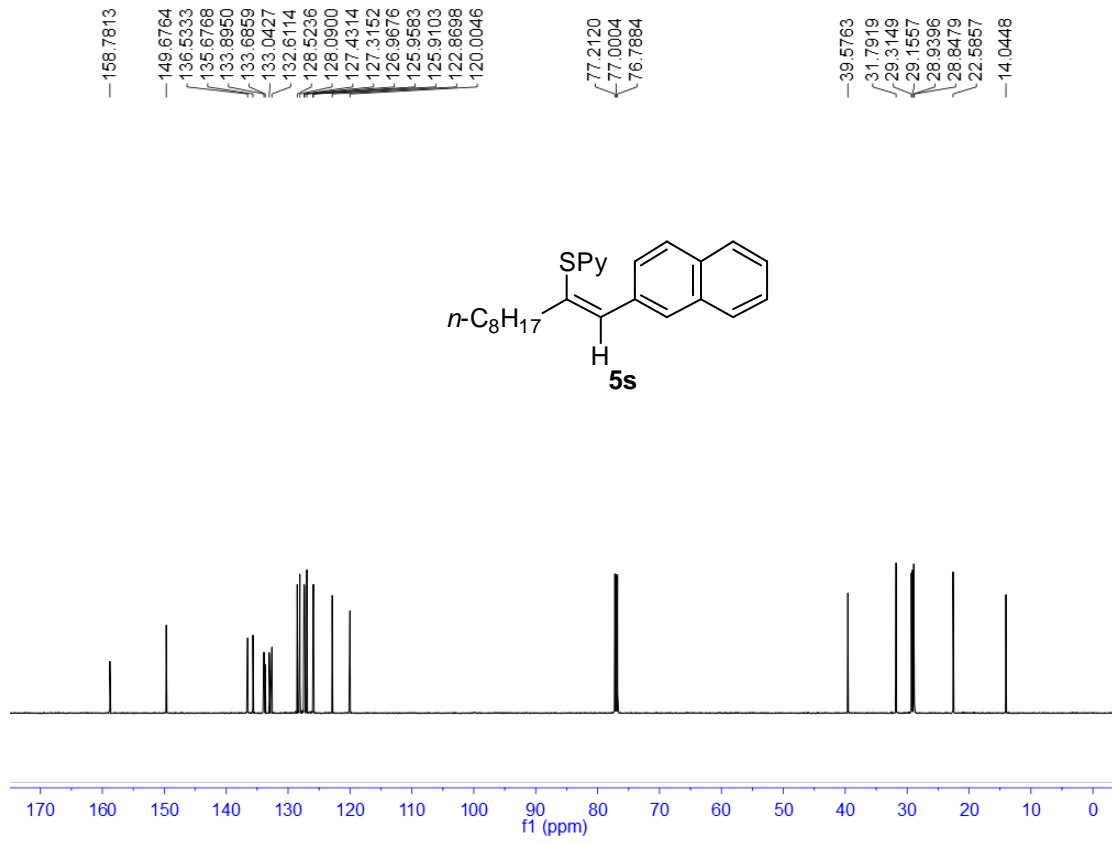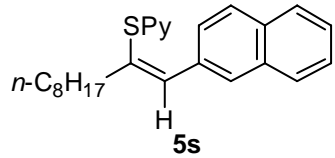

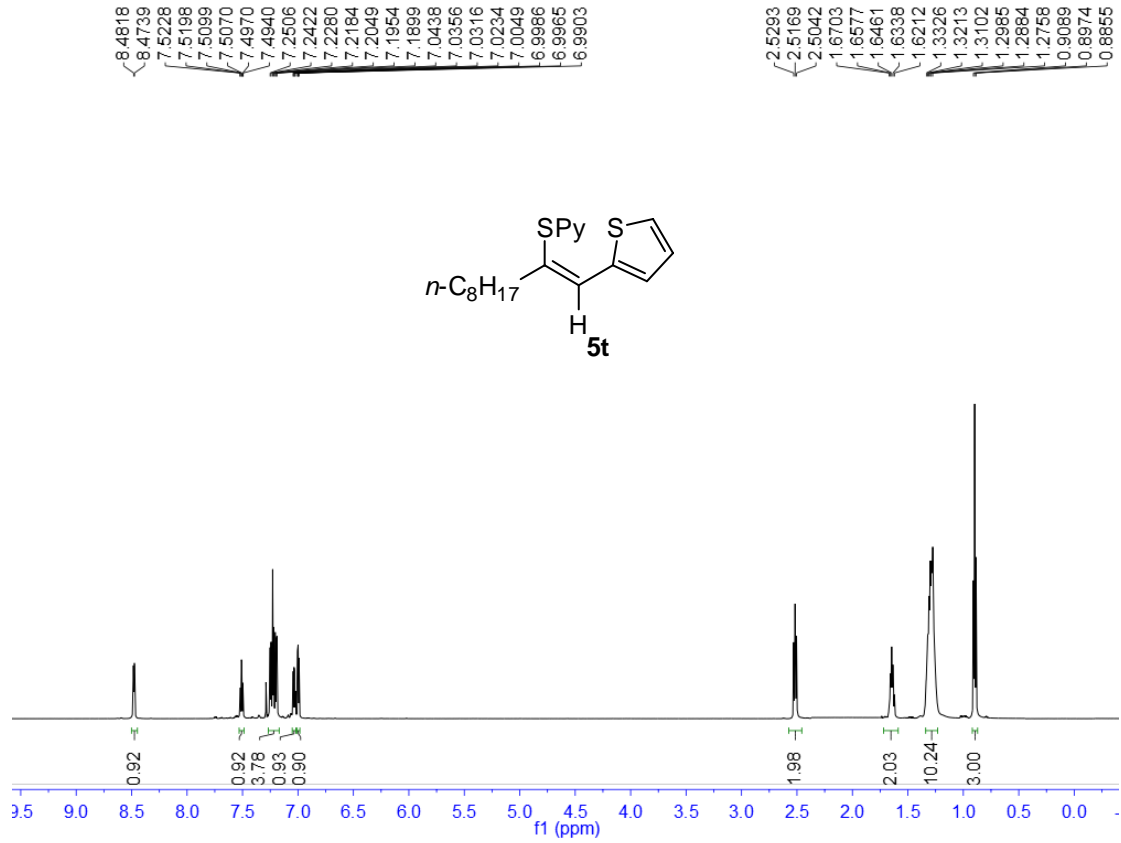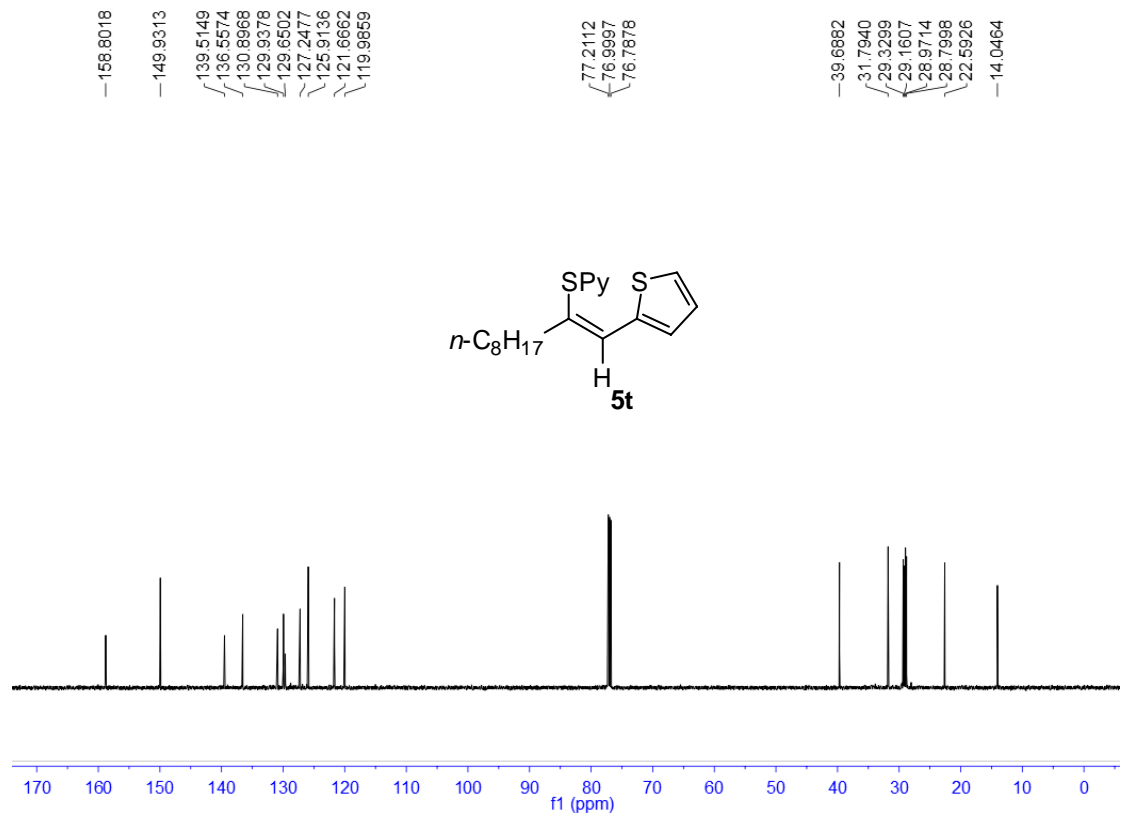

8.4768  
8.4747  
8.4647  
8.4626  
7.5317  
7.5165  
7.5129  
7.4976  
7.4931  
7.4264  
7.4162  
7.4079  
7.3905  
7.3775  
7.3513  
7.3185  
7.3003  
7.2810  
7.2385  
7.2203  
7.1920  
7.1718  
7.0329  
7.0203  
7.0163  
7.0036  
7.0021  
6.7843  
6.7581  
6.7124  
6.6733

2.4765  
2.4578  
2.4389  
1.6256  
1.6084  
1.5903  
1.5725  
1.3045  
1.2753  
0.9079  
0.8915  
0.8739

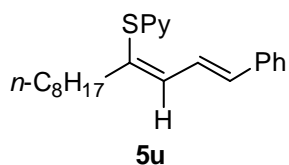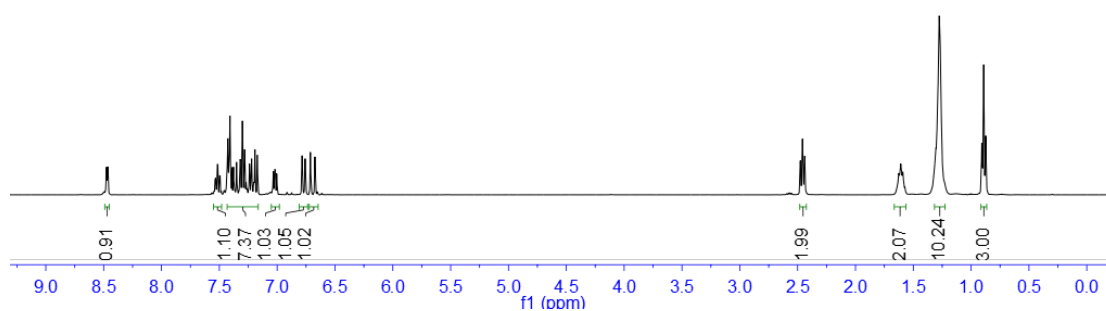

159.4621  
149.8000  
137.2177  
137.0690  
136.4915  
134.4053  
134.0554  
128.5010  
127.7550  
126.5774  
125.9012  
121.9425  
119.7887

77.3154  
76.9997  
76.6787

38.8036  
31.7746  
29.3041  
29.1363  
28.9627  
28.6843  
22.5794  
14.0456

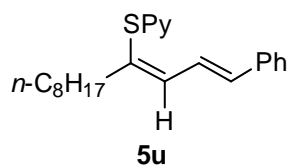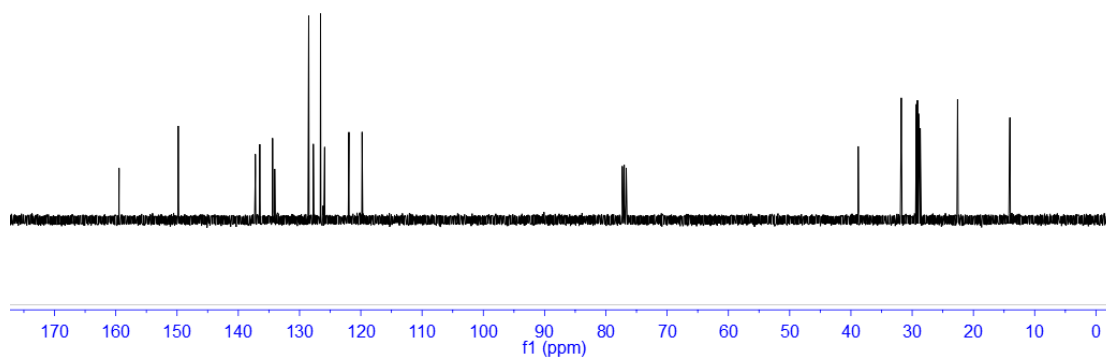

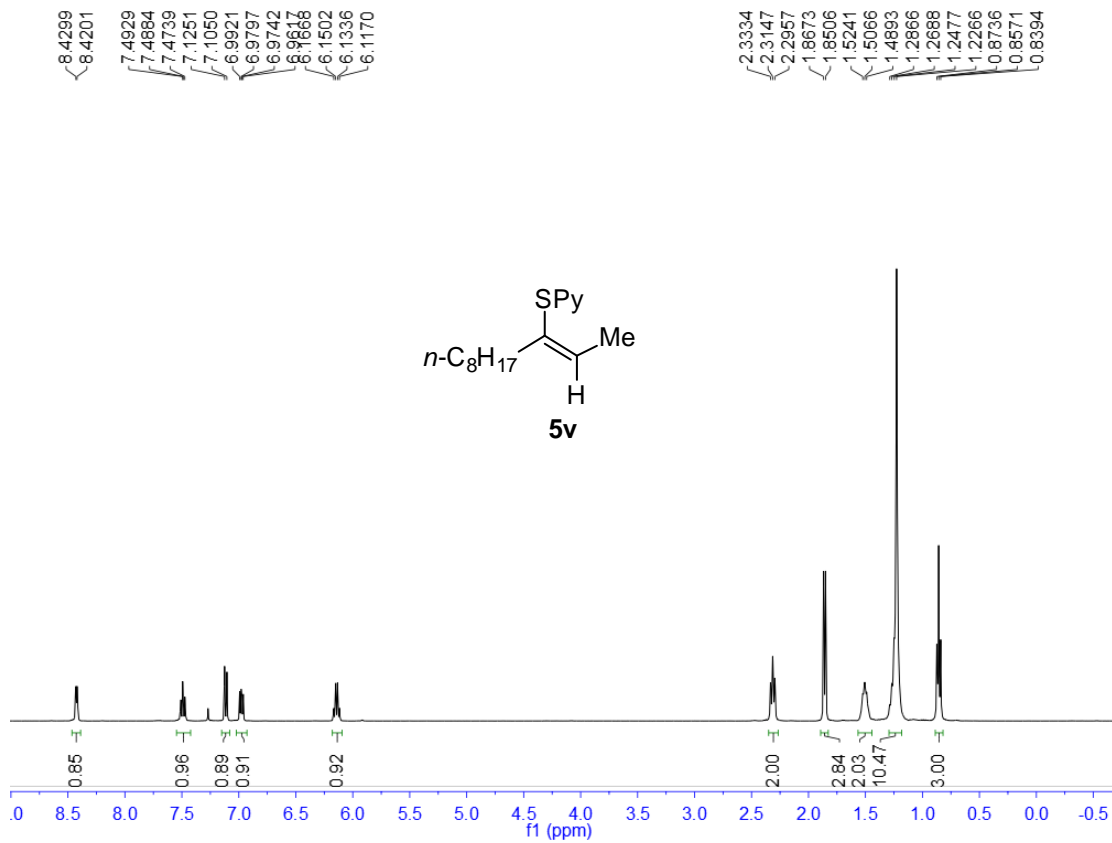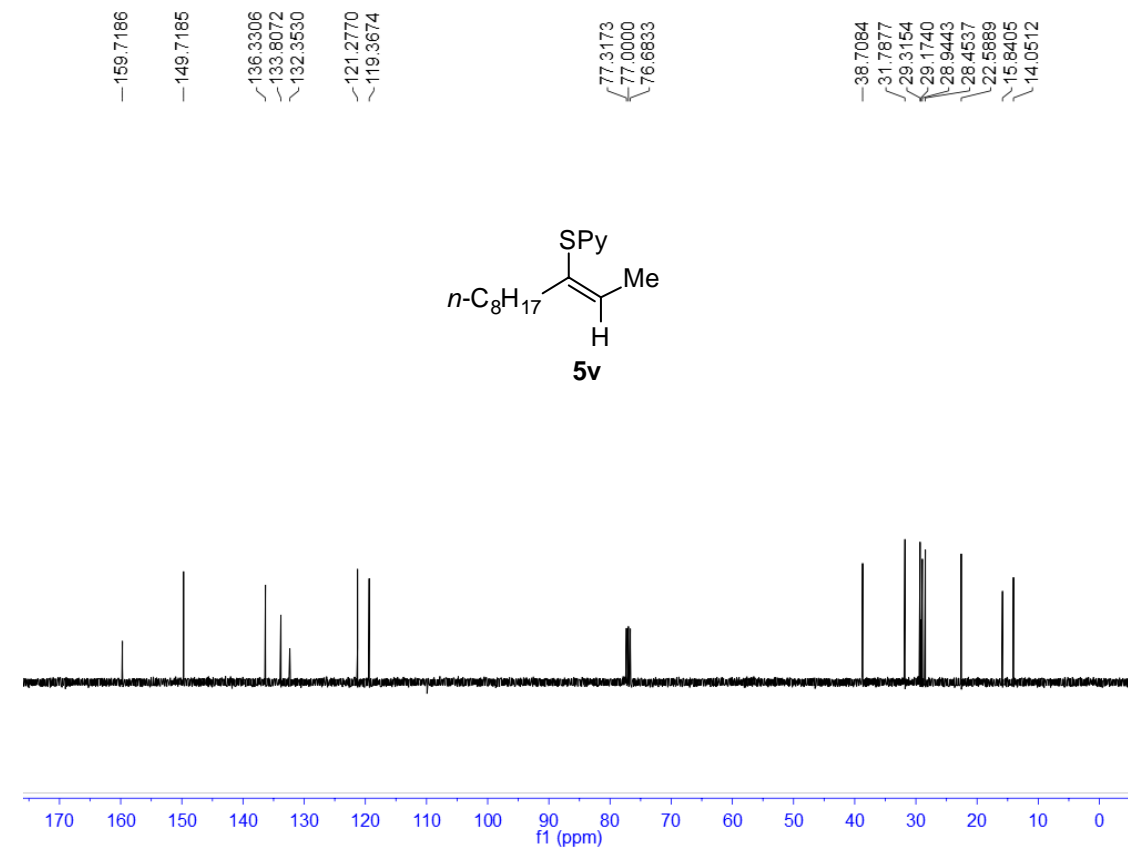

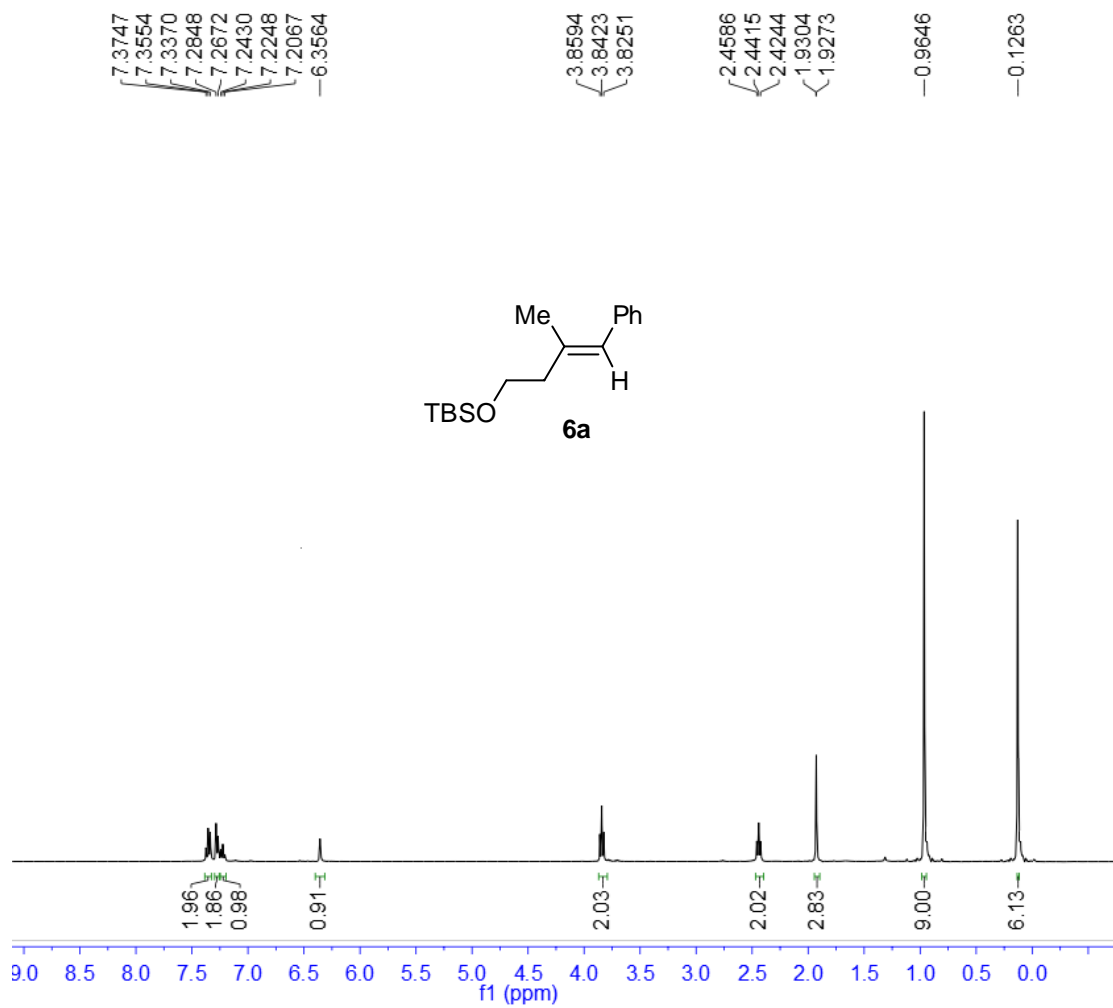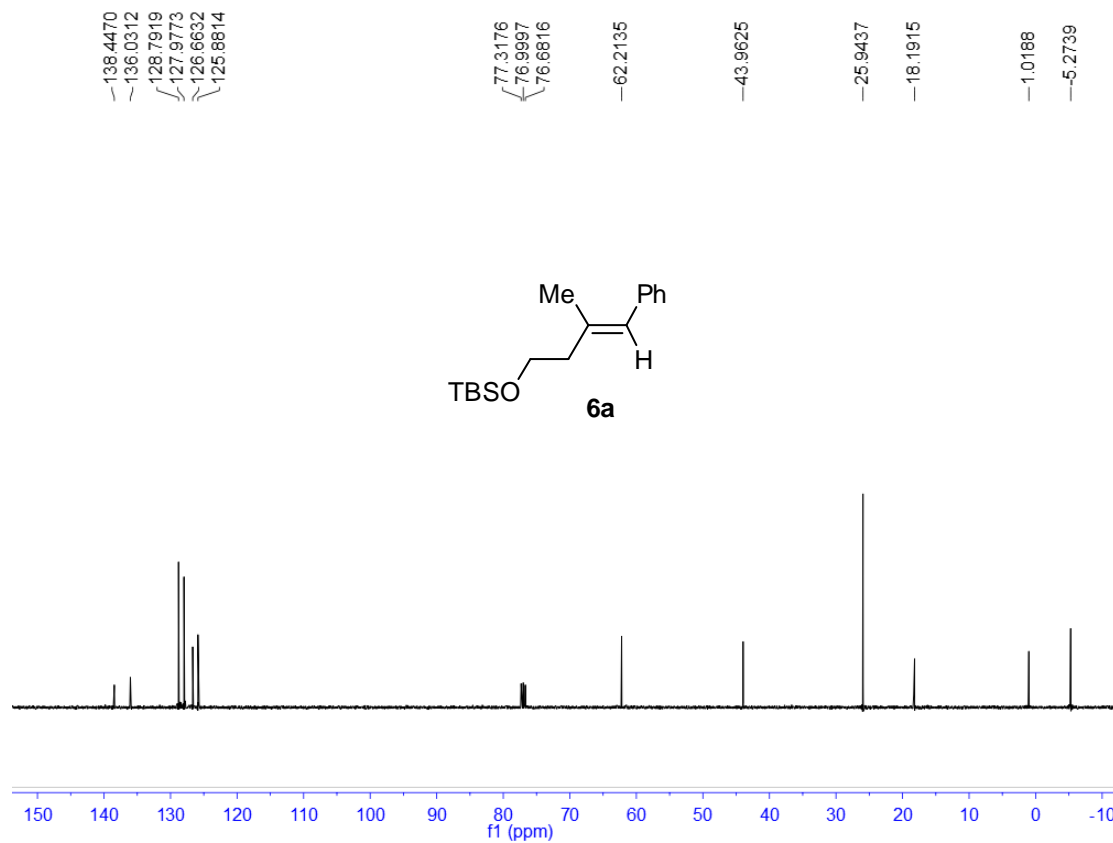

7.3518  
7.3324  
7.3141  
7.2671  
7.2489  
7.2139  
7.1957  
7.1778  
— 6.2852

2.2004  
2.1817  
2.1625  
1.8757  
1.8732  
1.5626  
1.5472  
1.5293  
1.5110  
1.3326  
1.3099  
0.9293  
0.9141  
0.8964

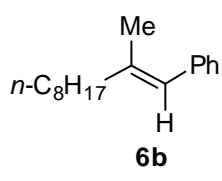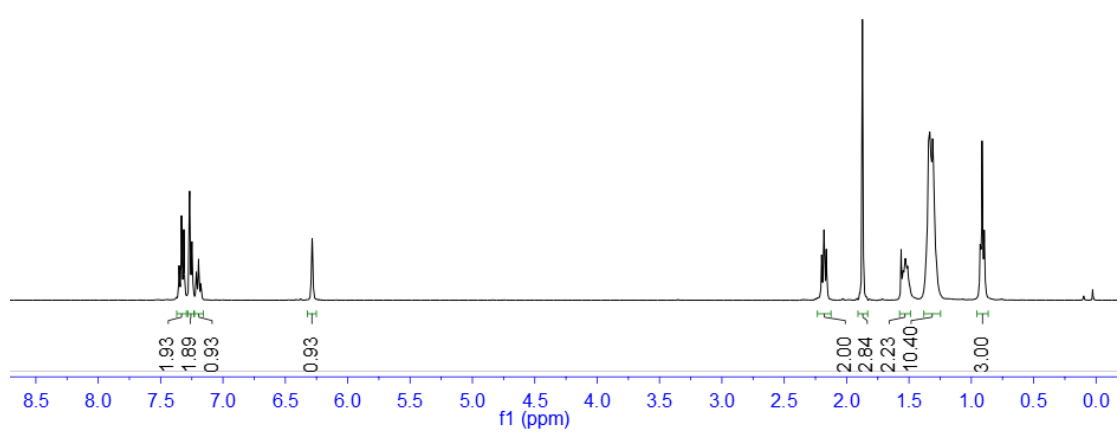

139.4388  
138.7135  
128.7887  
127.9638  
125.6968  
124.6133

77.3175  
76.9997  
76.8821

— 40.7573  
31.9081  
29.5416  
29.3303  
29.3218  
28.0027  
22.8855  
17.7301  
14.1214

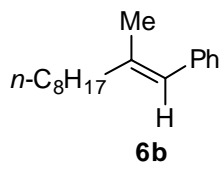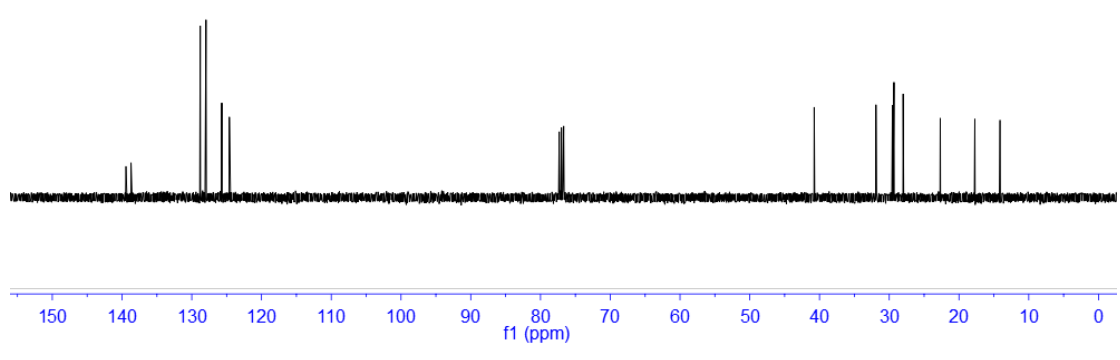

7.4055  
7.3926  
7.3797  
7.3667  
7.3144  
7.3023  
7.2882  
7.2794  
7.2668  
7.2650  
7.2526  
-6.3487

2.9351  
2.9219  
2.9082  
2.5713  
2.5563  
2.5444  
1.9917  
1.9899

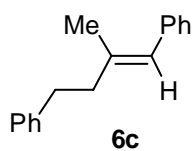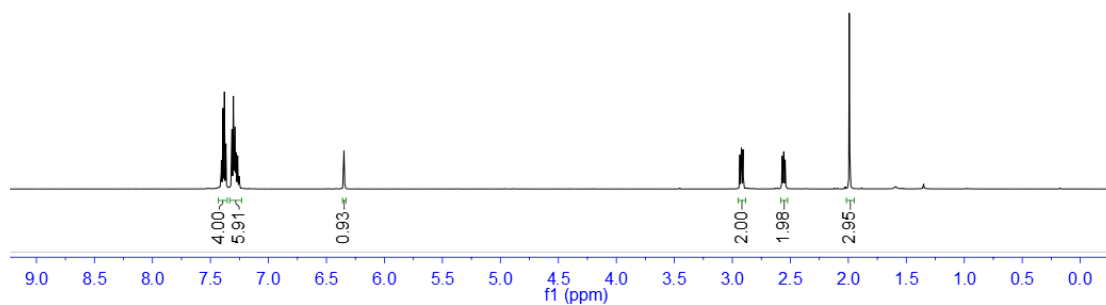

142.0434  
138.4587  
138.2223  
128.7720  
128.4083  
128.2528  
127.9803  
125.8665  
125.7882  
125.4204

77.2117  
77.0000  
76.7883

-42.5714  
-34.7081

-17.9249

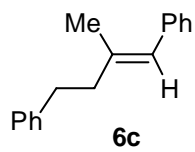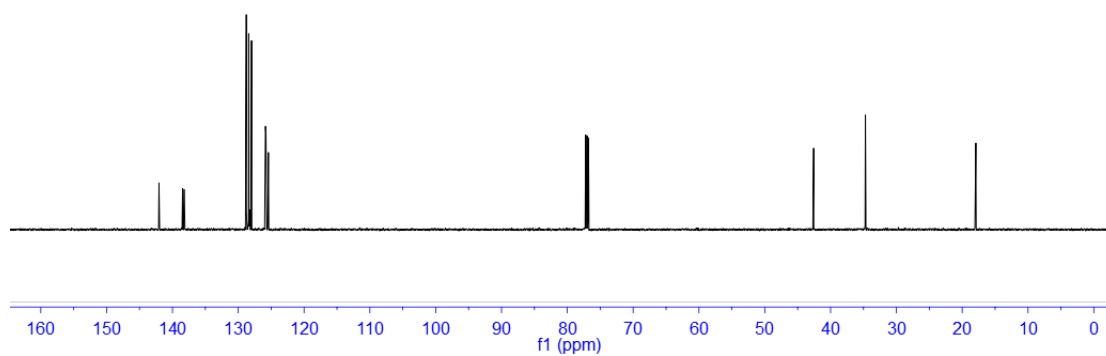

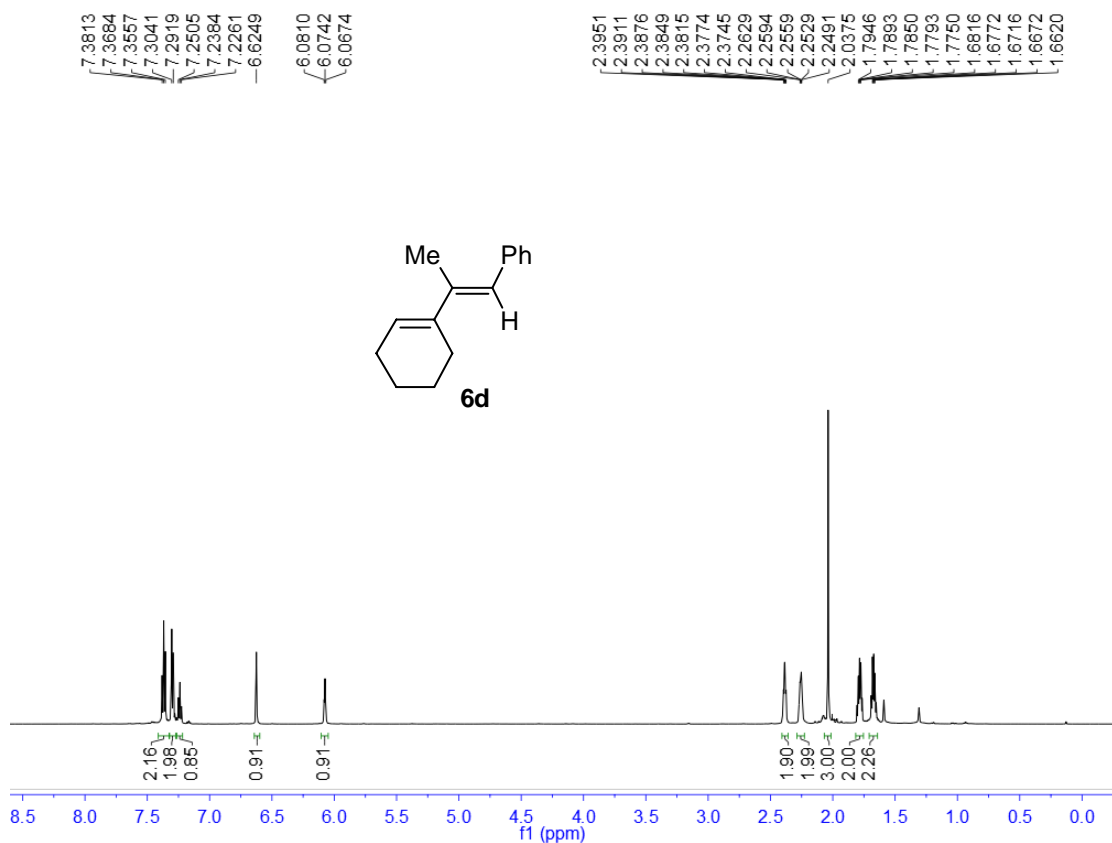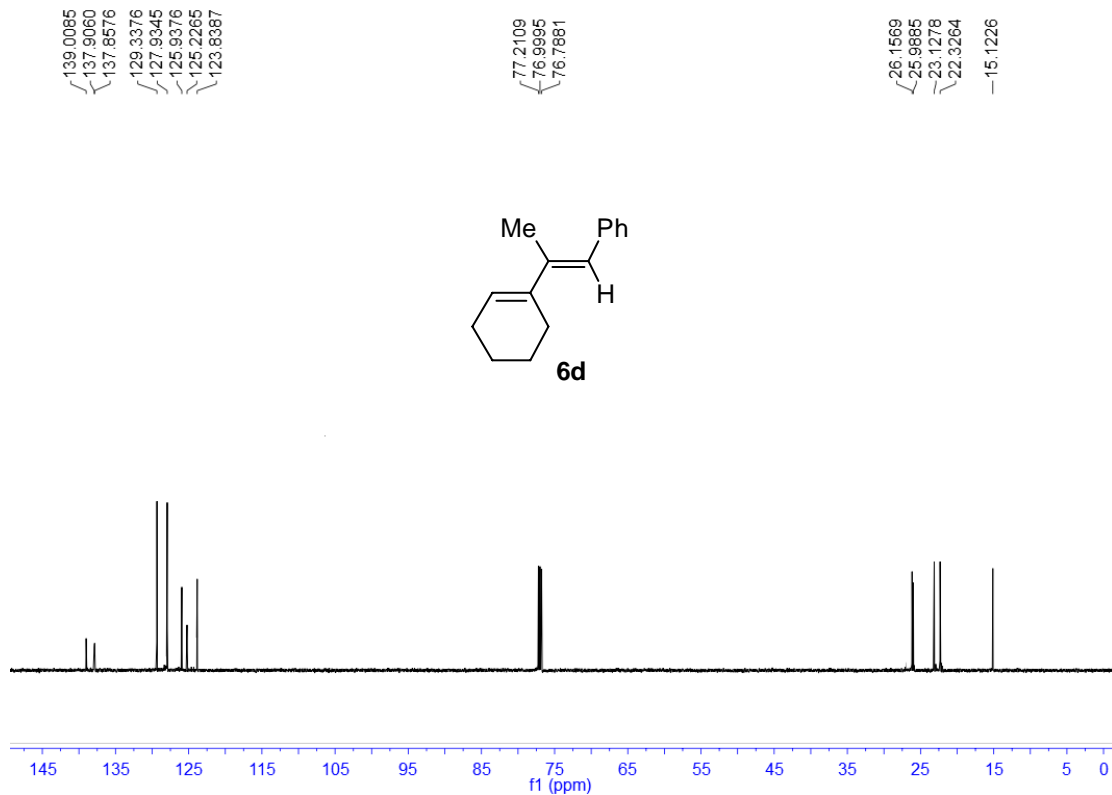



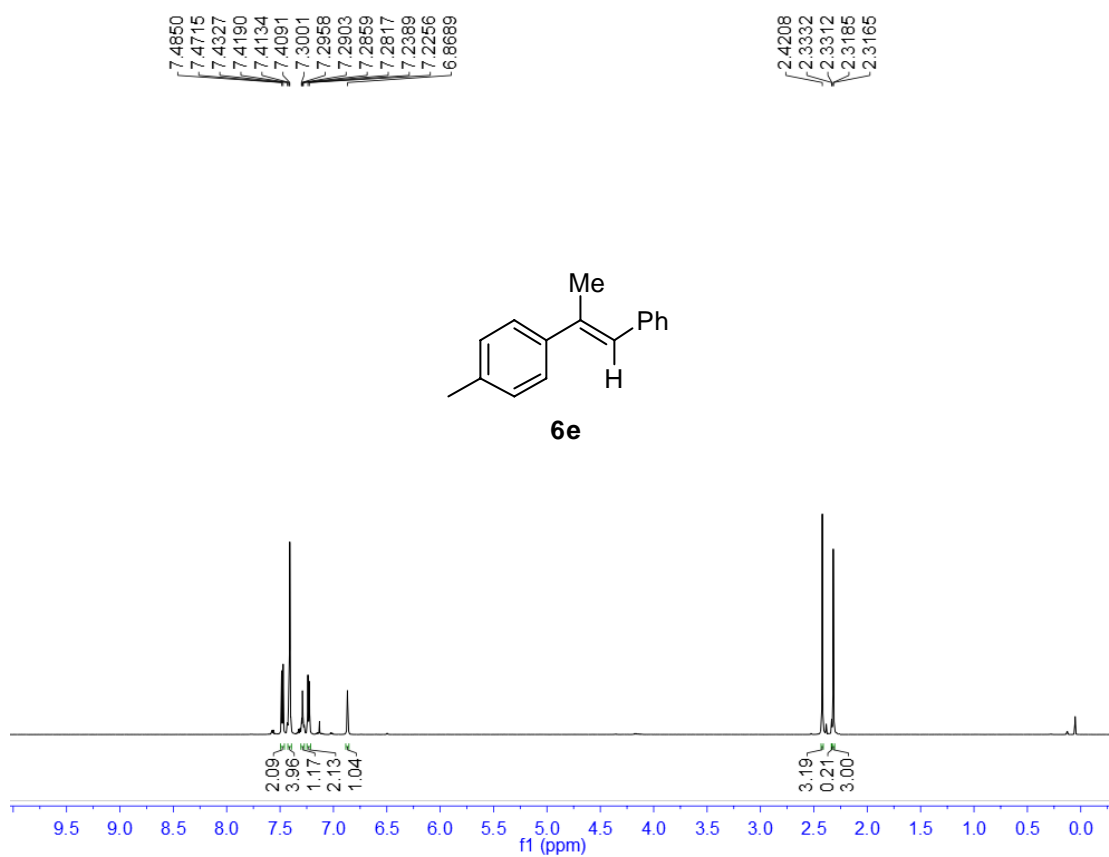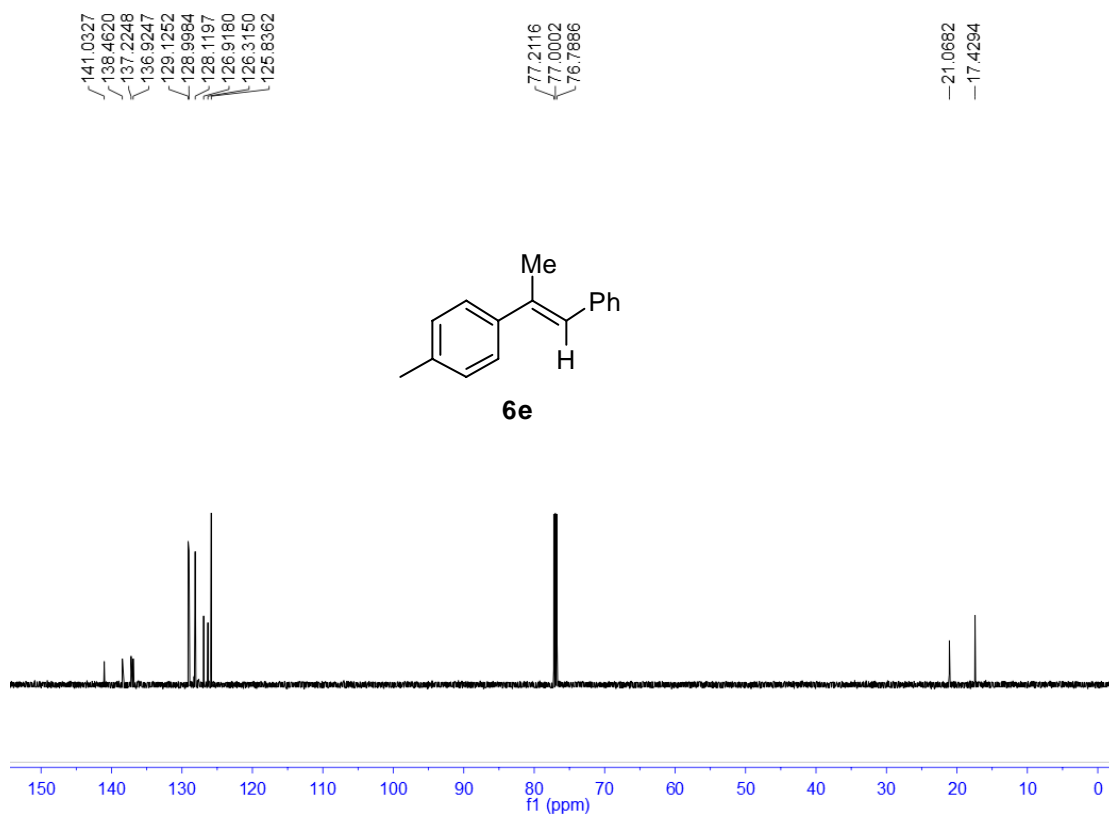

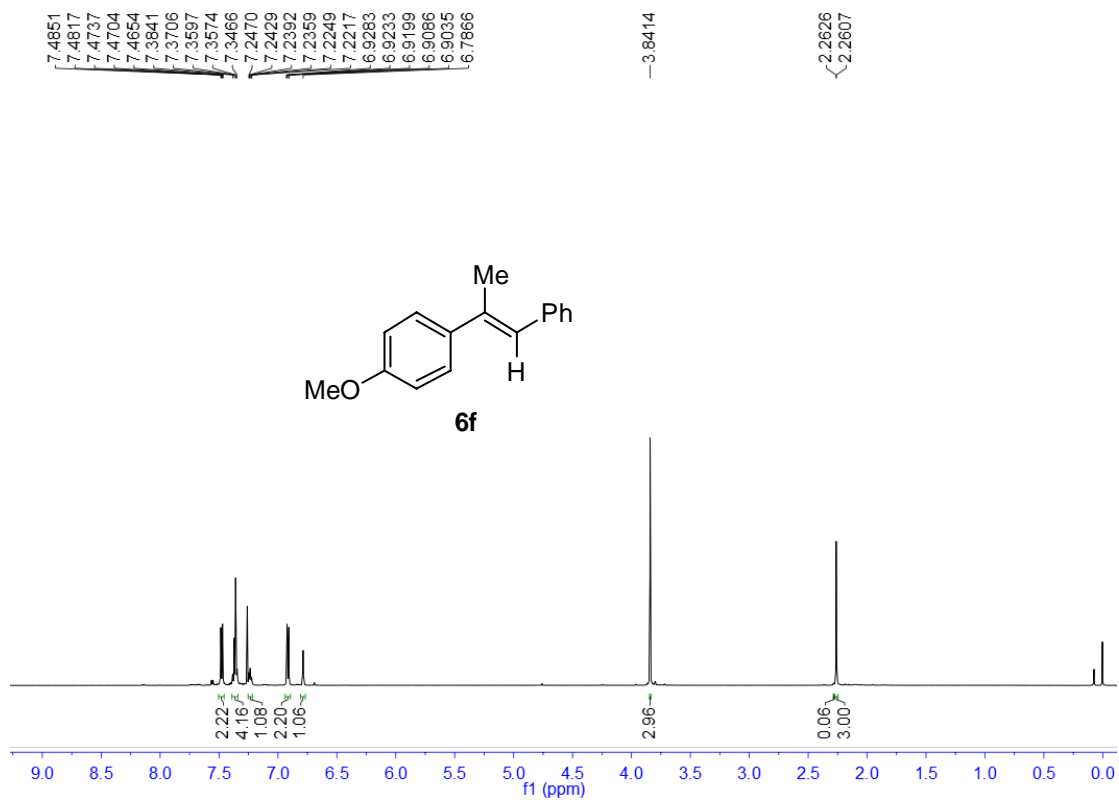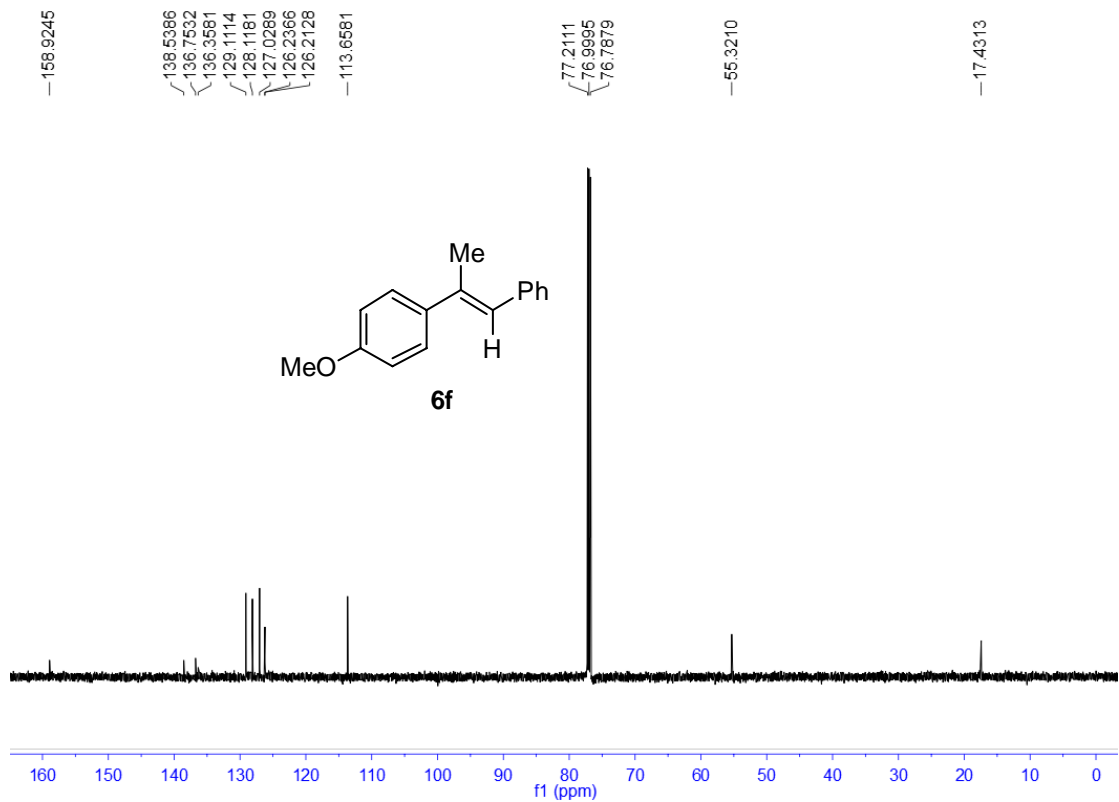

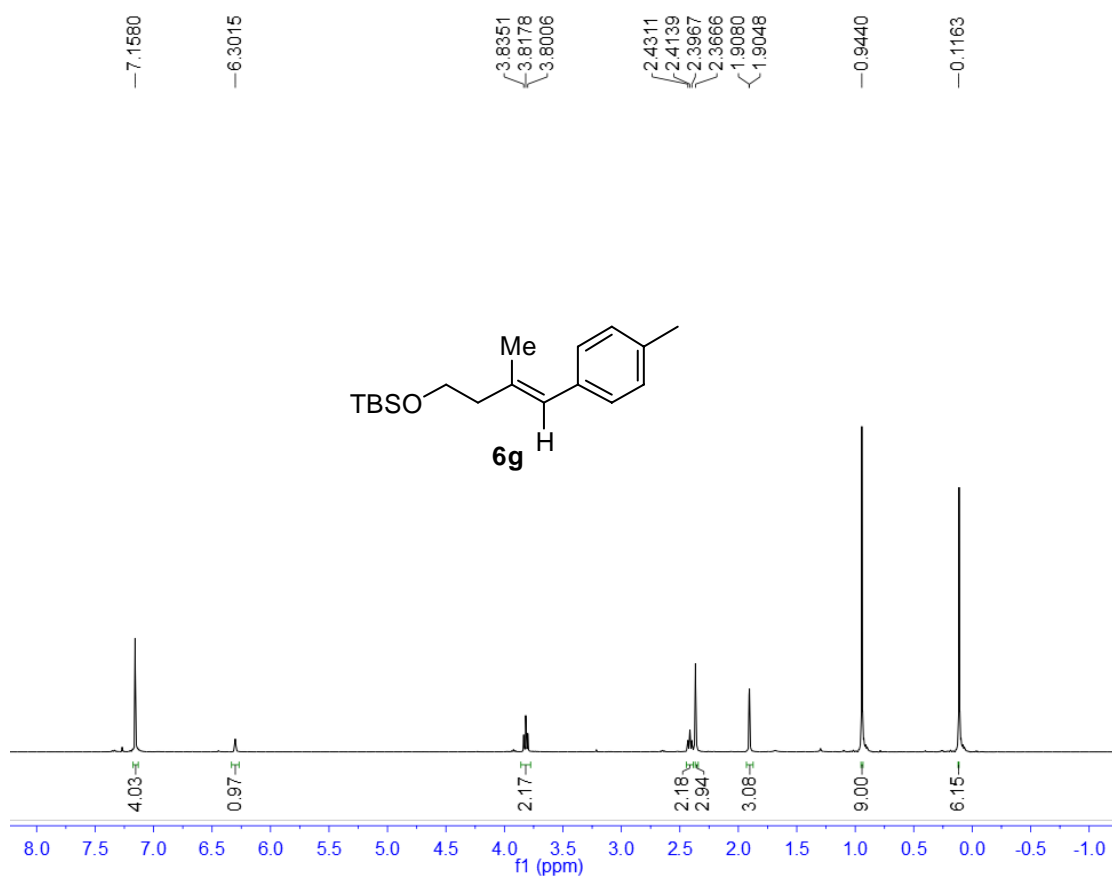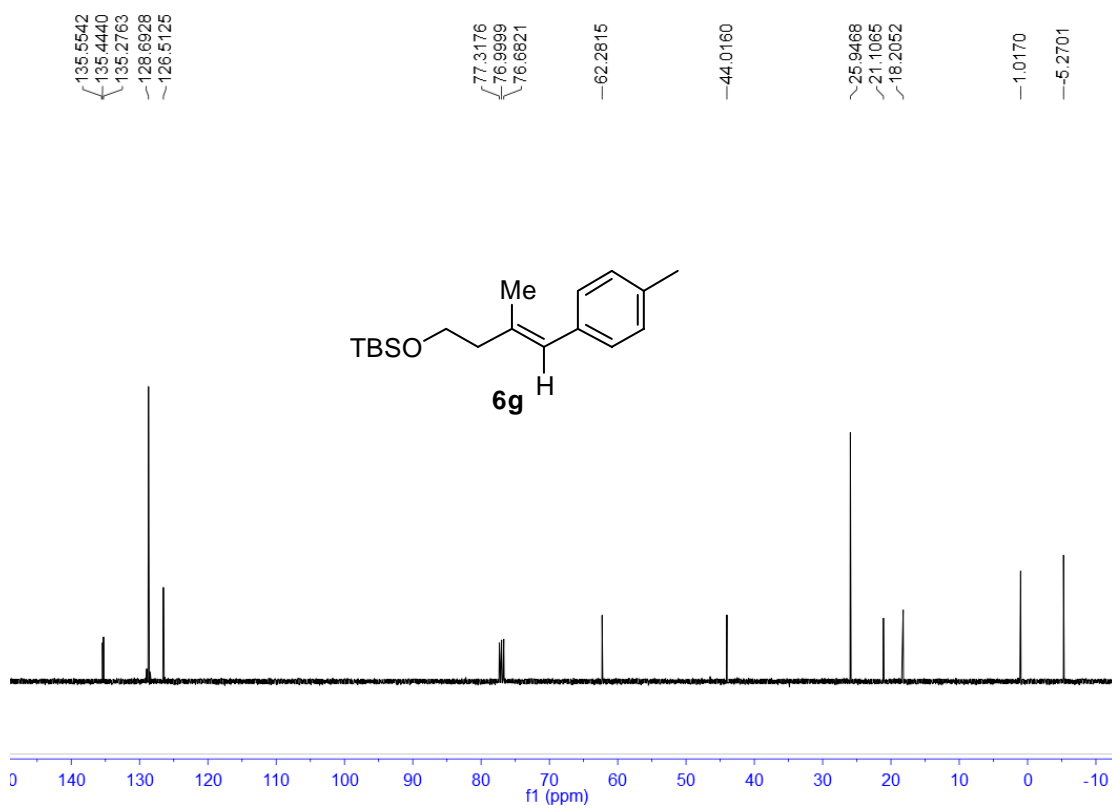

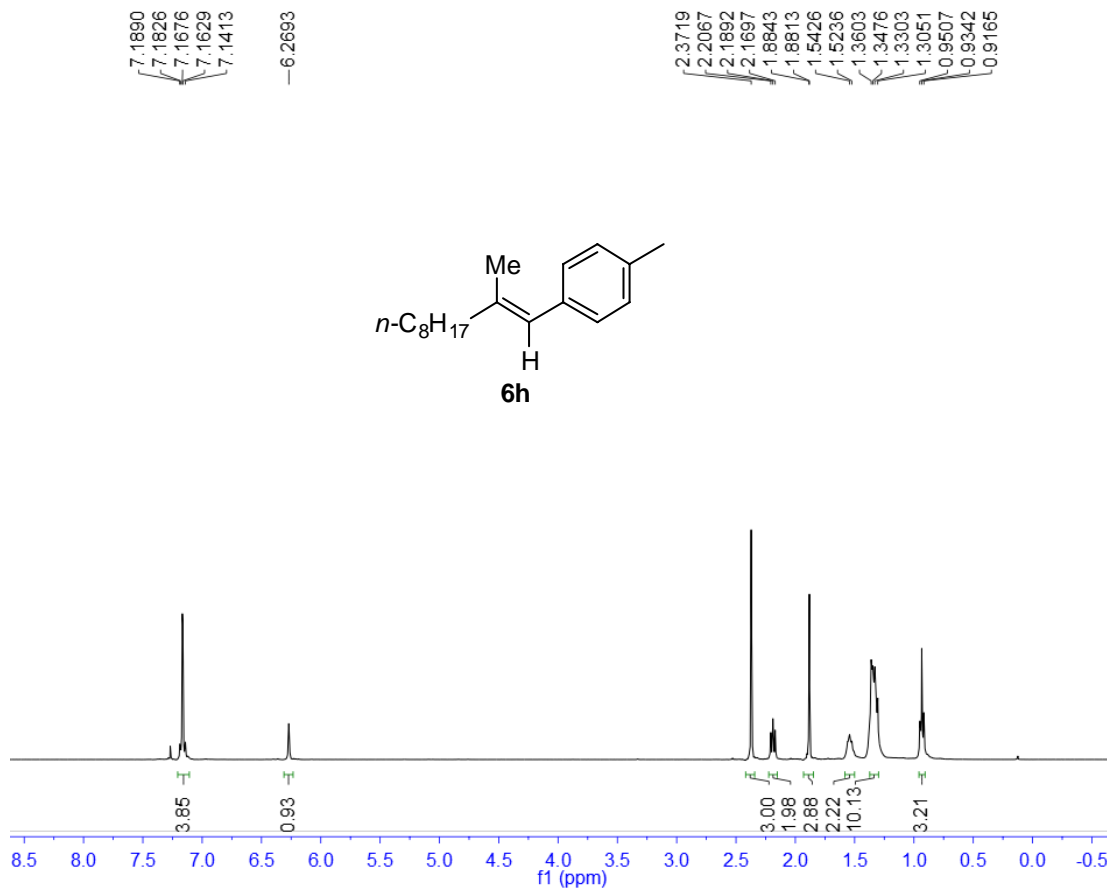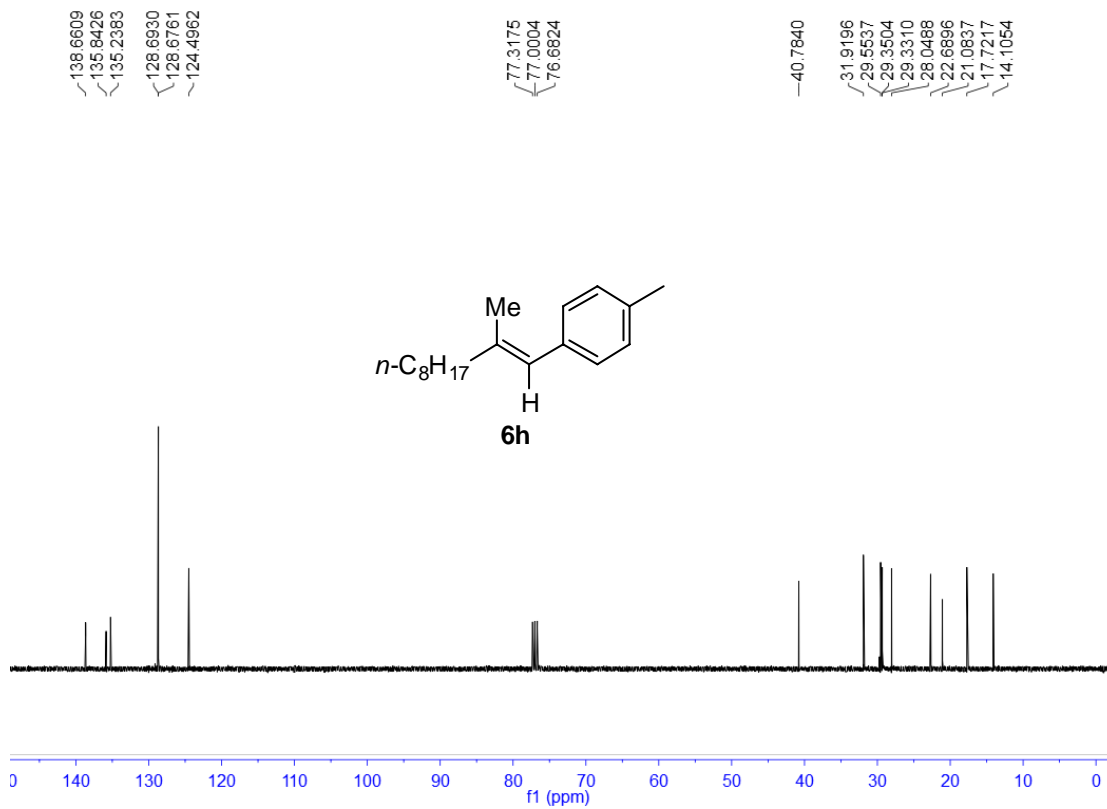

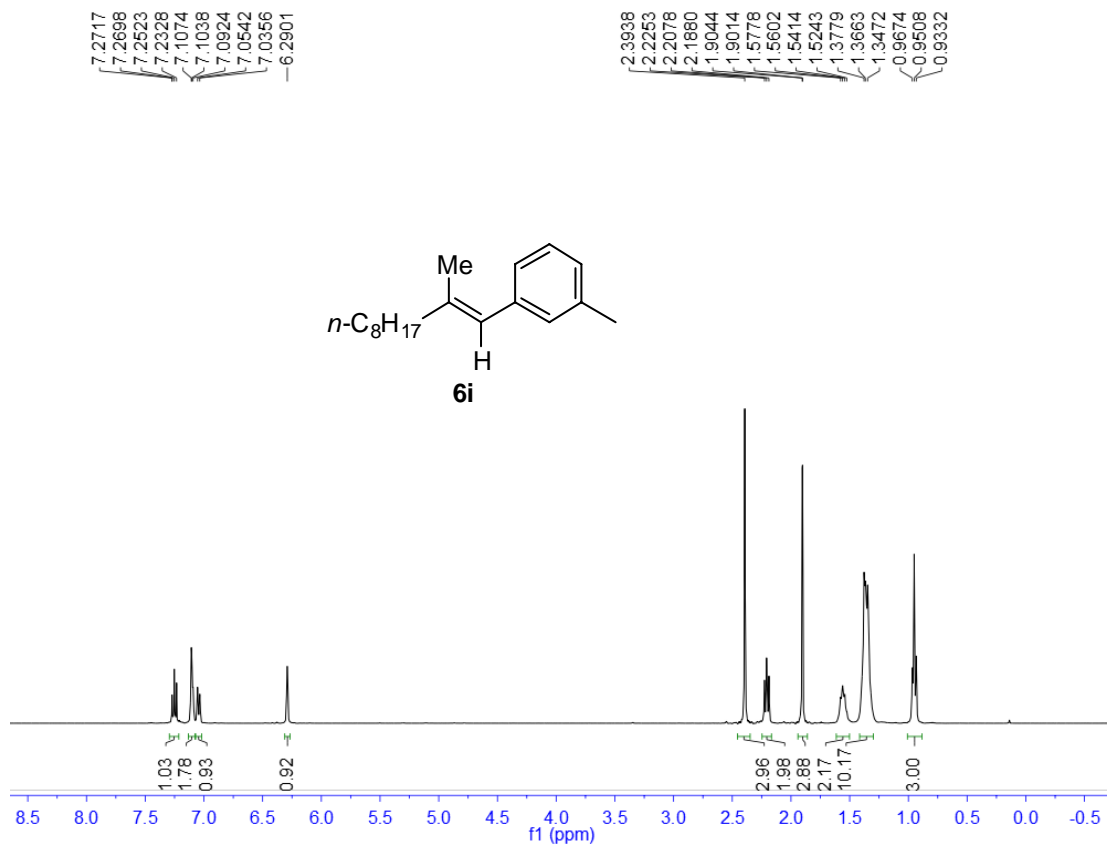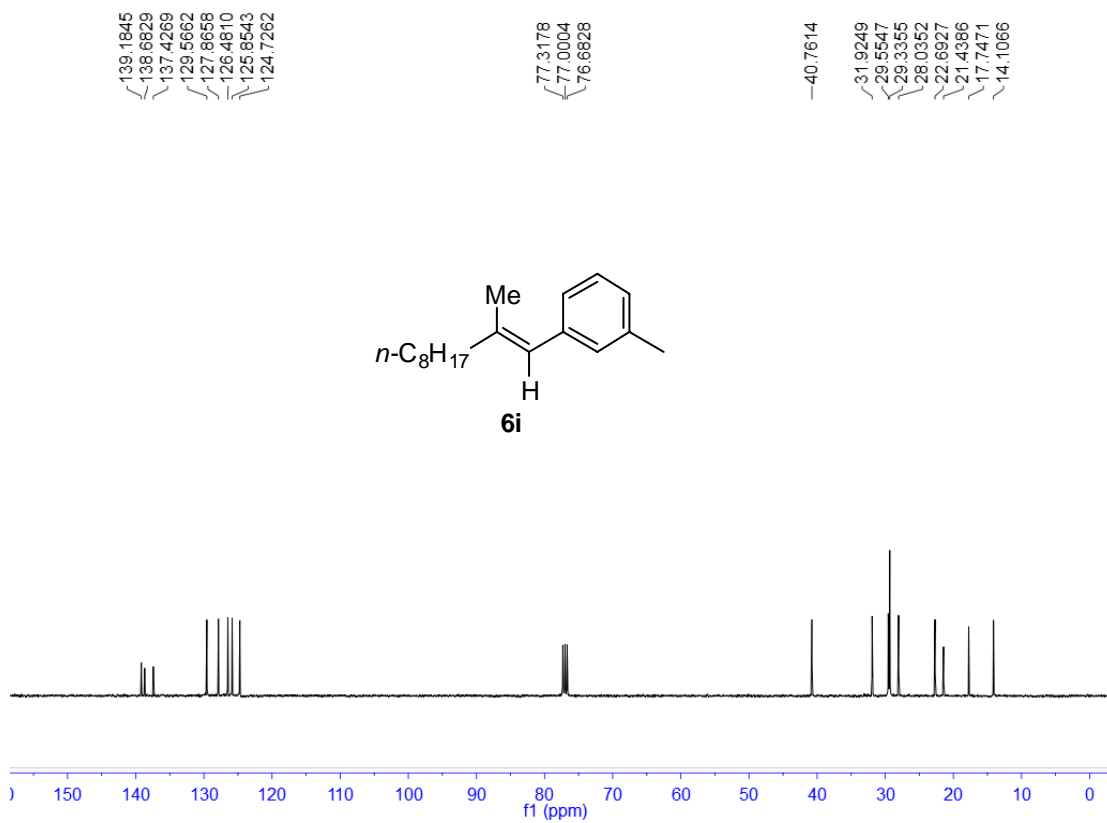

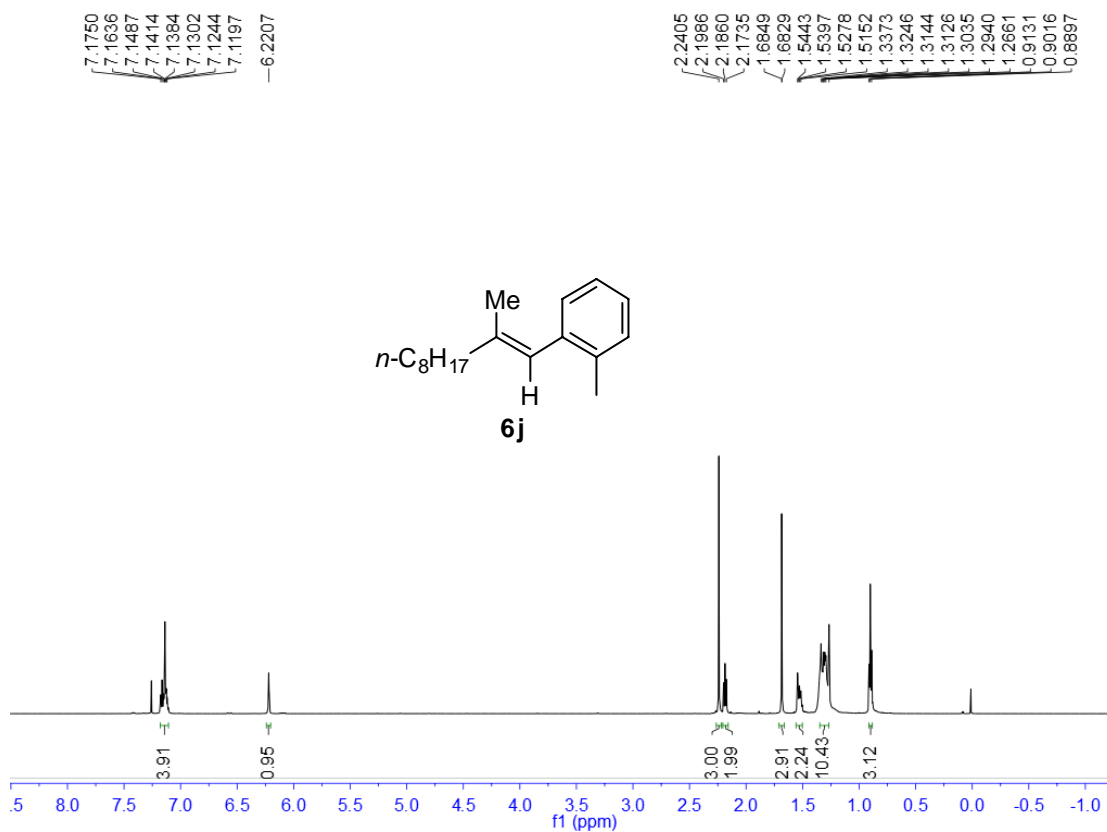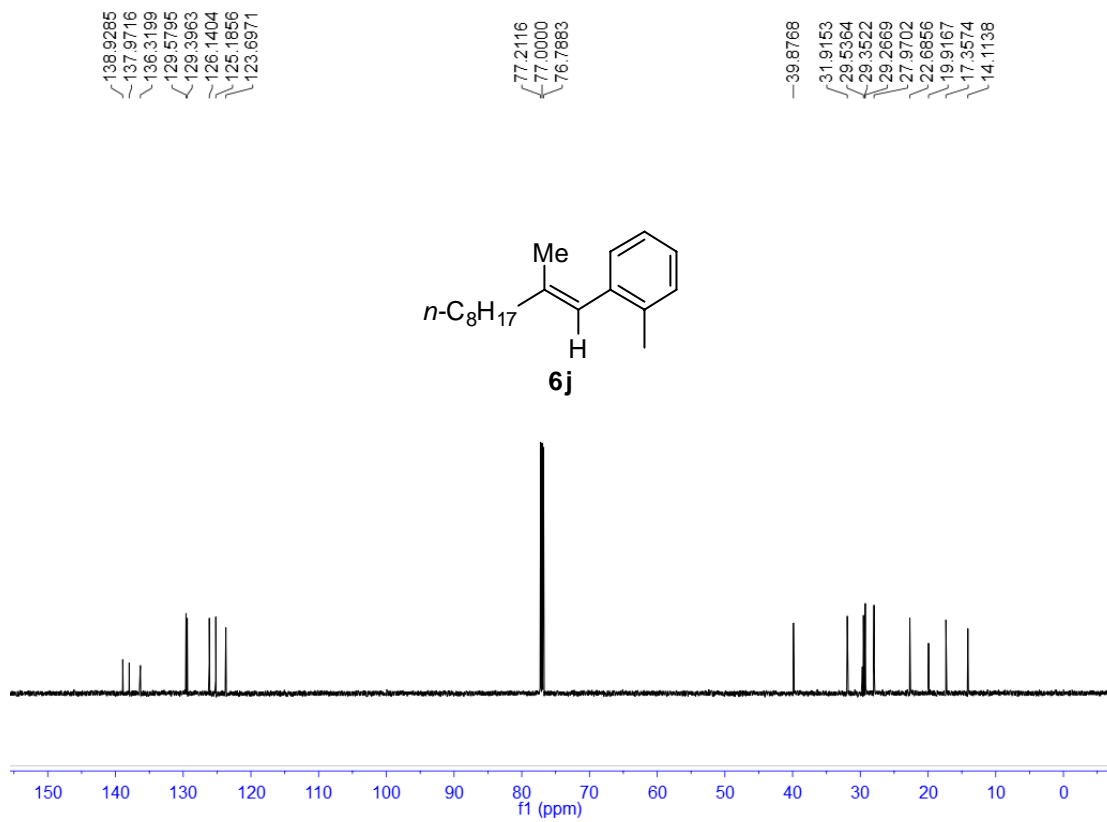

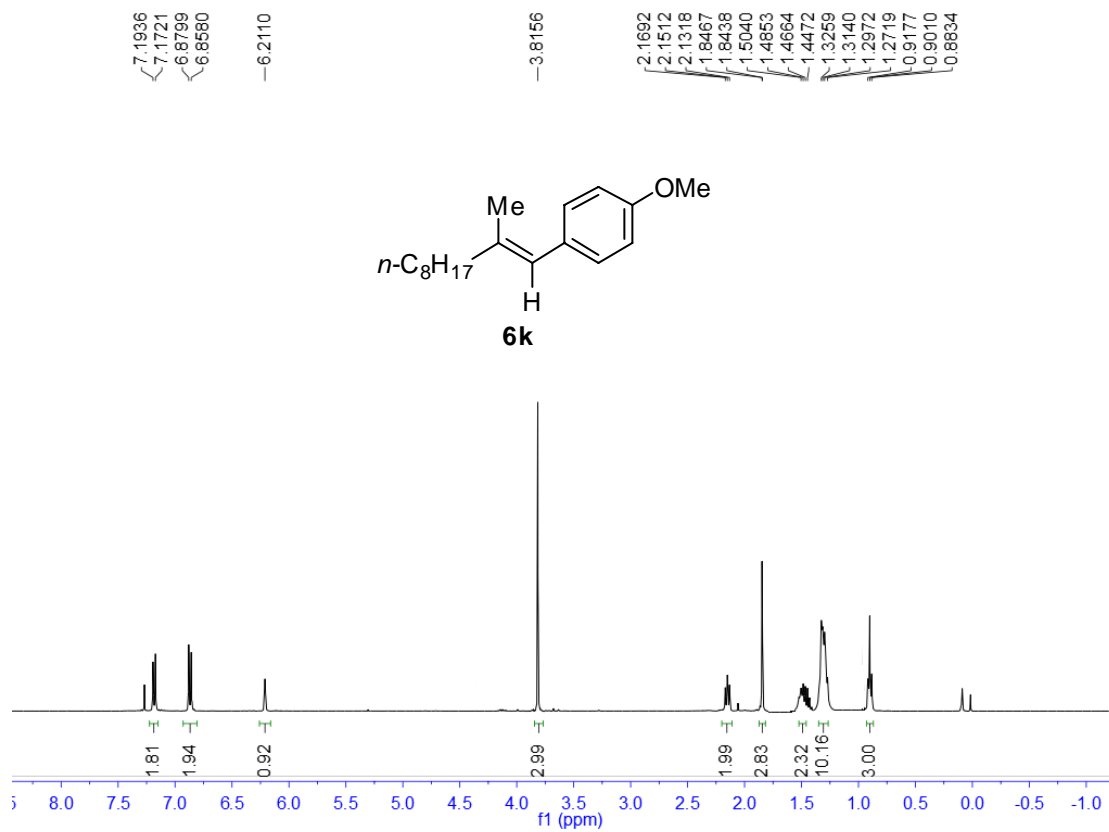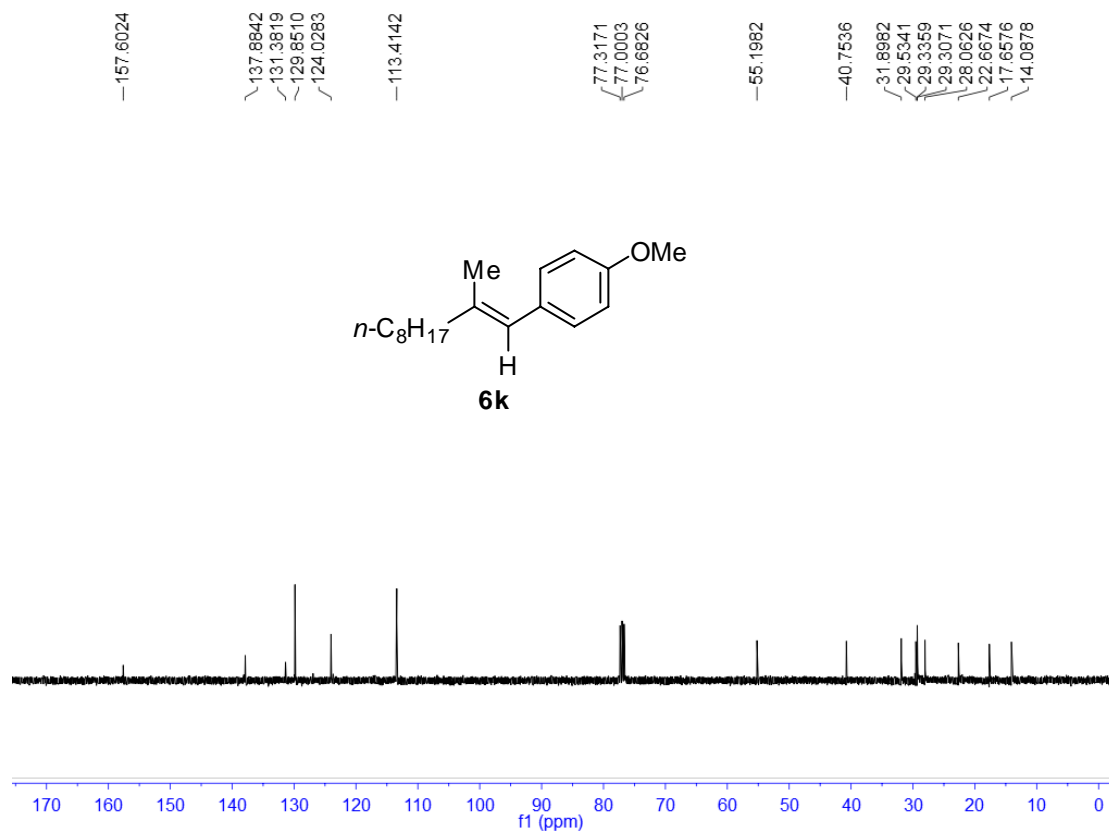

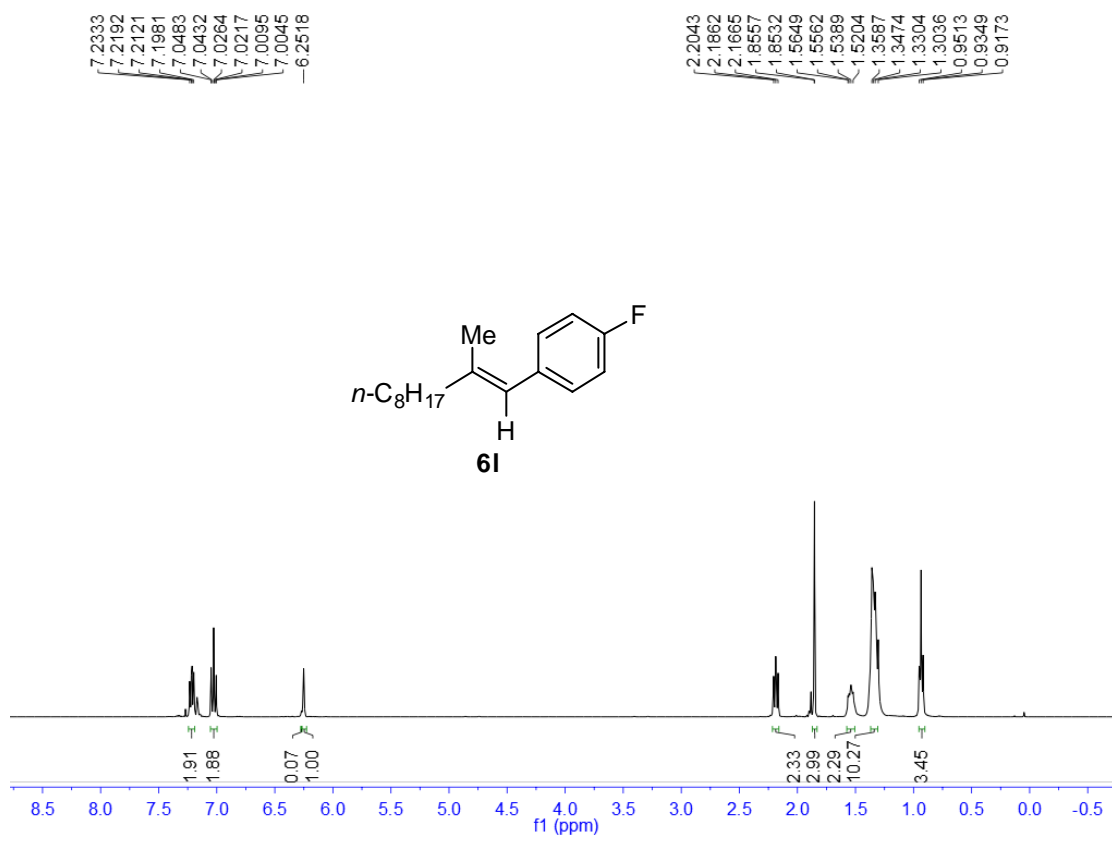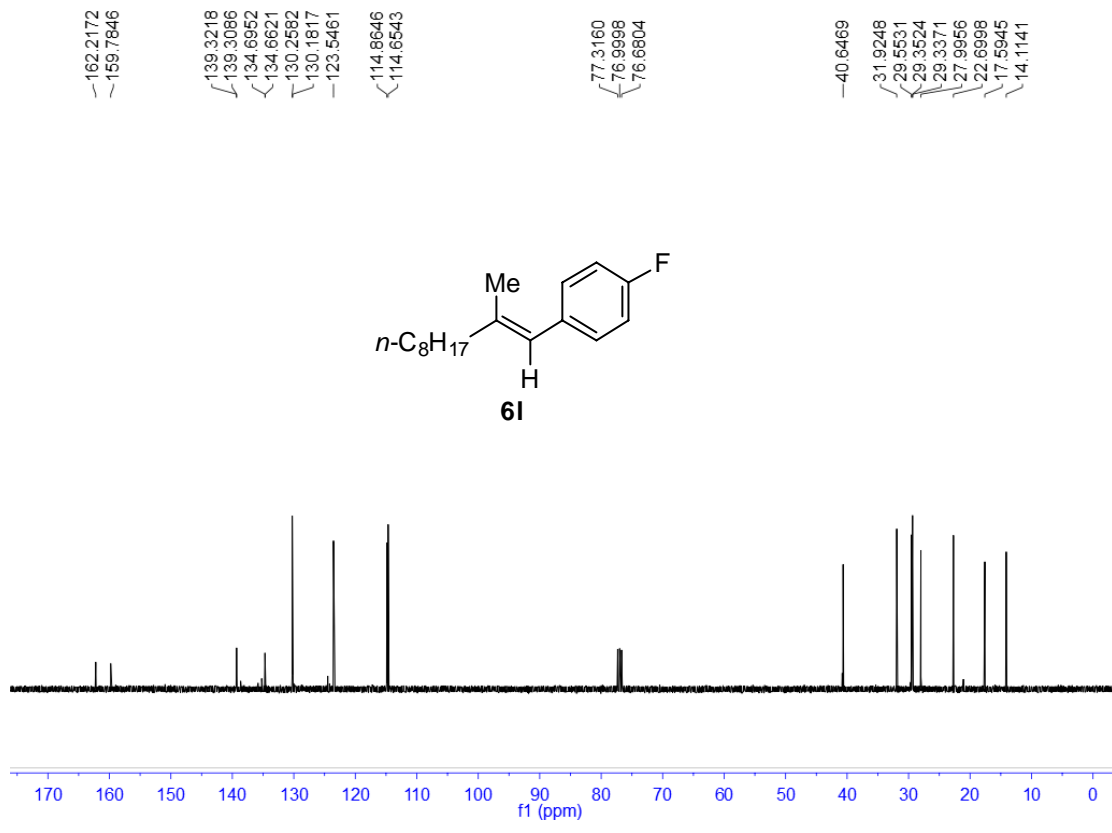





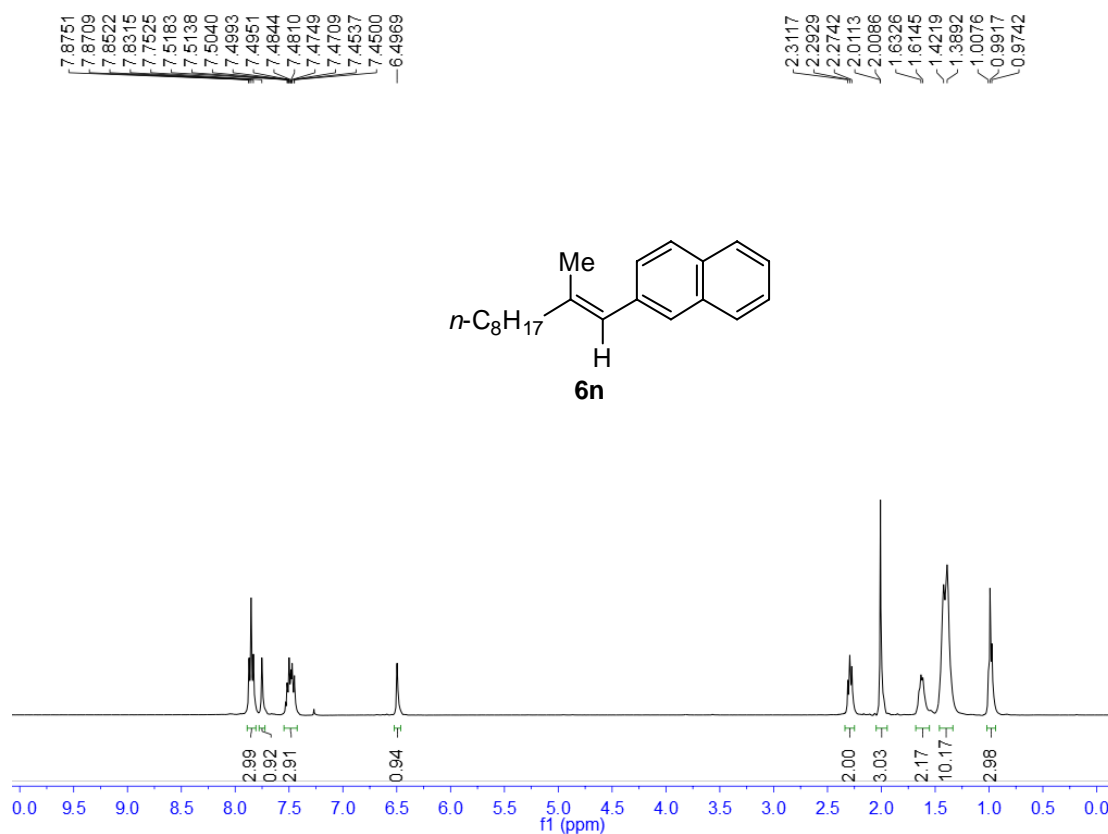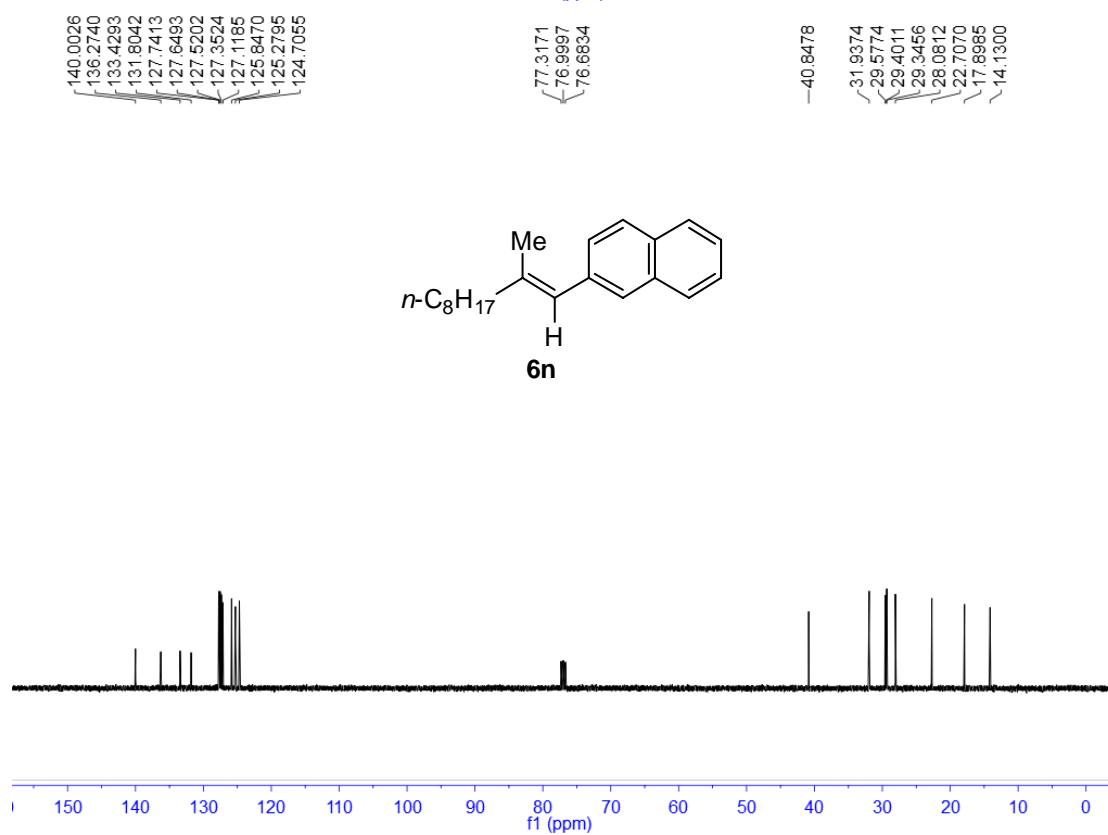

7.2241  
7.2157  
7.0341  
7.0279  
7.0198  
6.9471  
6.9417  
-6.4316

2.2099  
2.1974  
2.1846  
1.9989  
1.5284  
1.5177  
1.5068  
1.3330  
1.3163  
1.3081  
1.2894  
0.9292  
0.9181  
0.9064

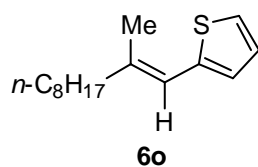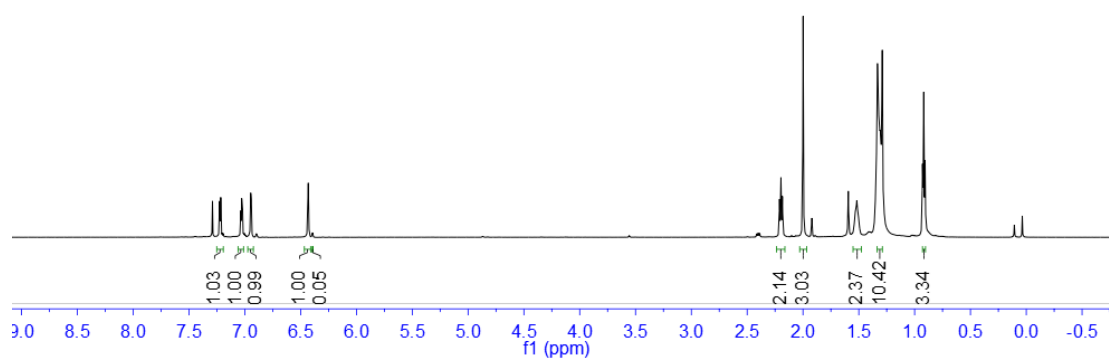

-141.8074  
-138.6041

-126.6518  
-125.6627  
-123.6683  
-117.9943

77.2118  
77.0002  
76.7886

-41.0391  
31.8860  
29.6932  
29.5091  
29.3012  
28.0731  
22.6673  
18.4848  
14.1014

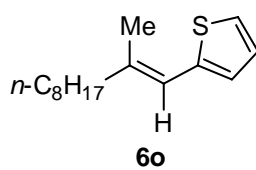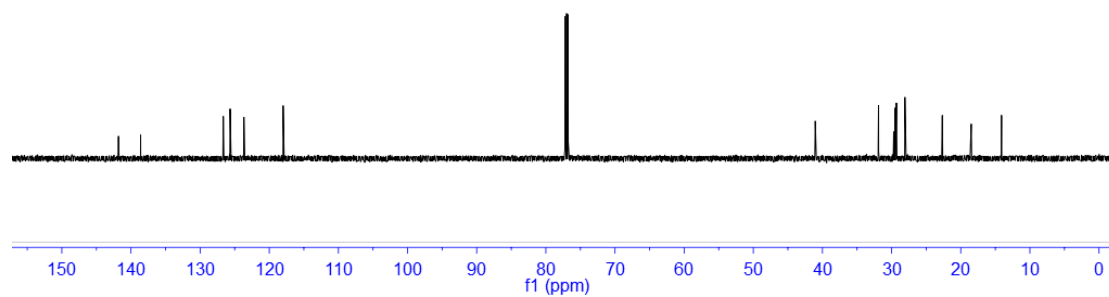

7.4657  
7.4532  
7.3692  
7.3567  
7.3434  
7.2537  
7.2433  
7.2310  
7.1032  
7.0849  
7.0773  
7.0591  
6.5211  
6.4952  
6.0840  
6.0644

2.1813  
2.1684  
2.1554  
1.9152  
1.3648  
1.3576  
1.3451  
0.9655  
0.9579  
0.9460

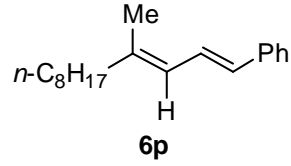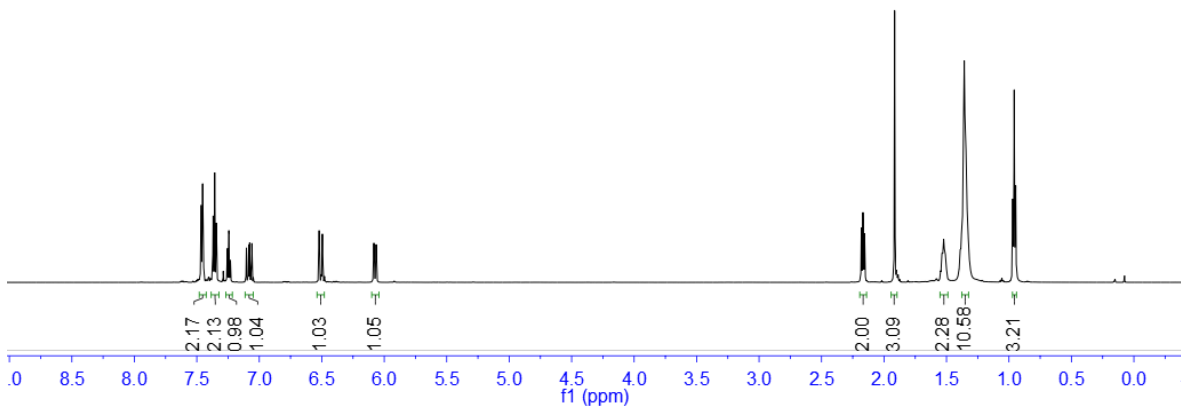

140.6402  
138.1334  
129.7198  
128.4976  
126.8390  
126.0367  
125.7170  
124.9144

77.3160  
76.9998  
76.6814

40.1239  
31.9006  
29.5306  
29.3652  
29.2906  
27.9098  
22.6801  
16.8405  
14.1075

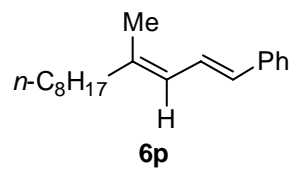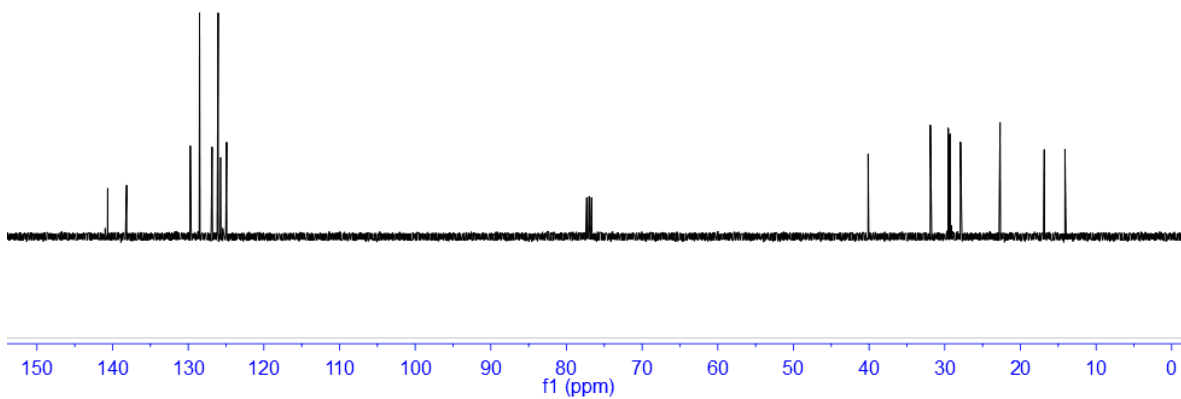

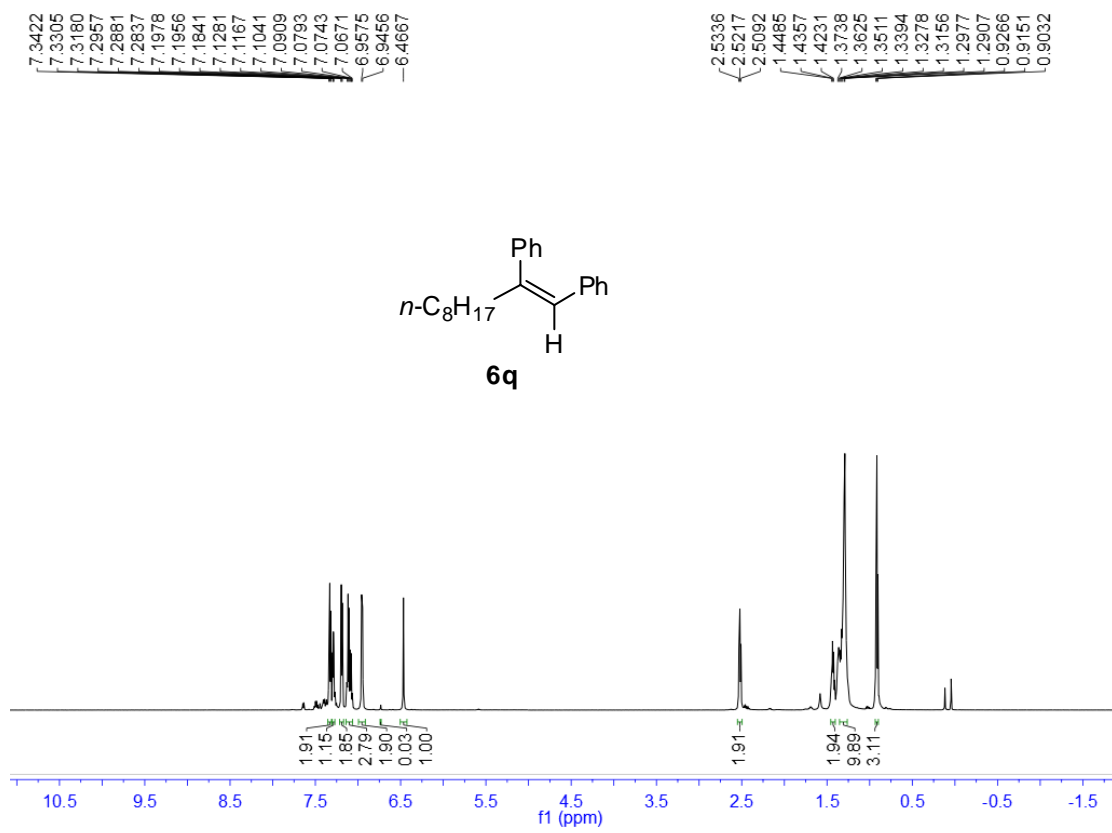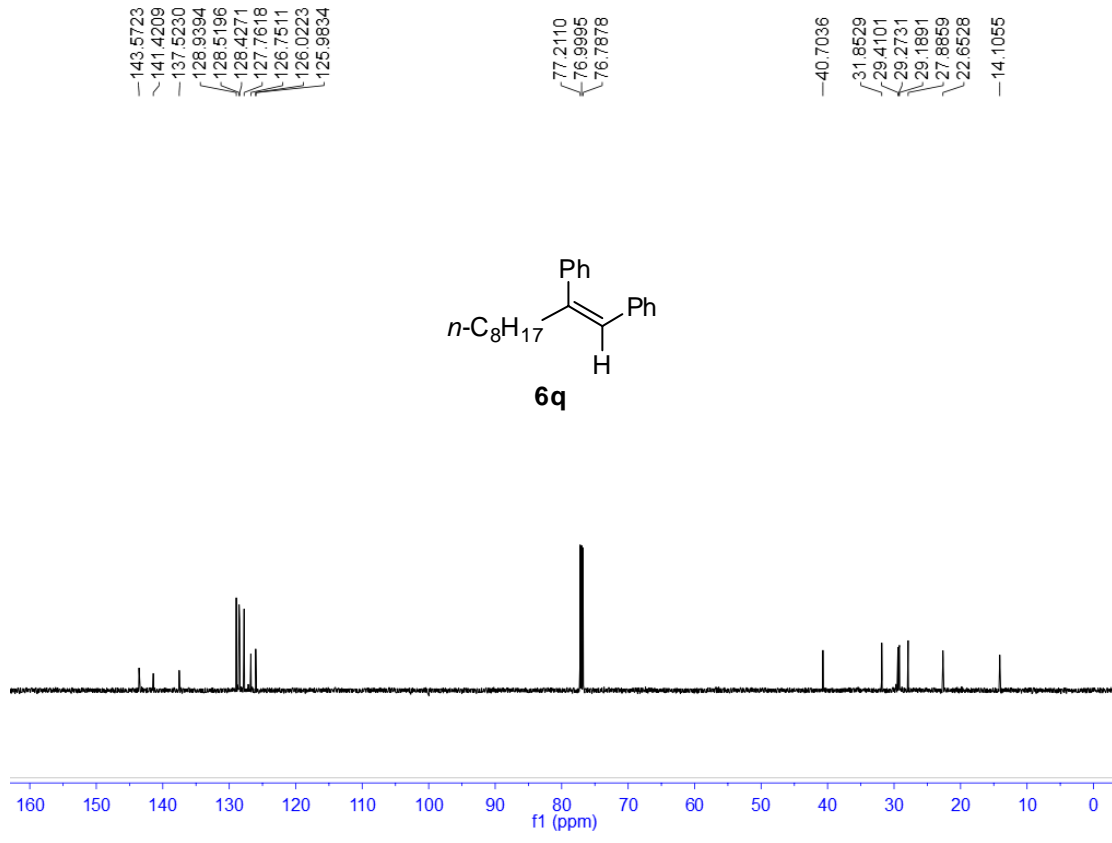

7.0995  
7.0854  
7.0716  
7.0520  
7.0413  
7.0282  
6.9376  
6.9256  
6.4127  
6.3955

2.4674  
2.4558  
2.4434  
2.3446  
1.3941  
1.3813  
1.3687  
1.3565  
1.3202  
1.3086  
1.2962  
1.2821  
1.2702  
1.2431  
0.8817  
0.8702  
0.8583

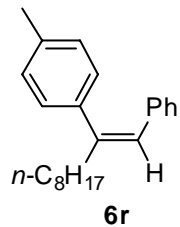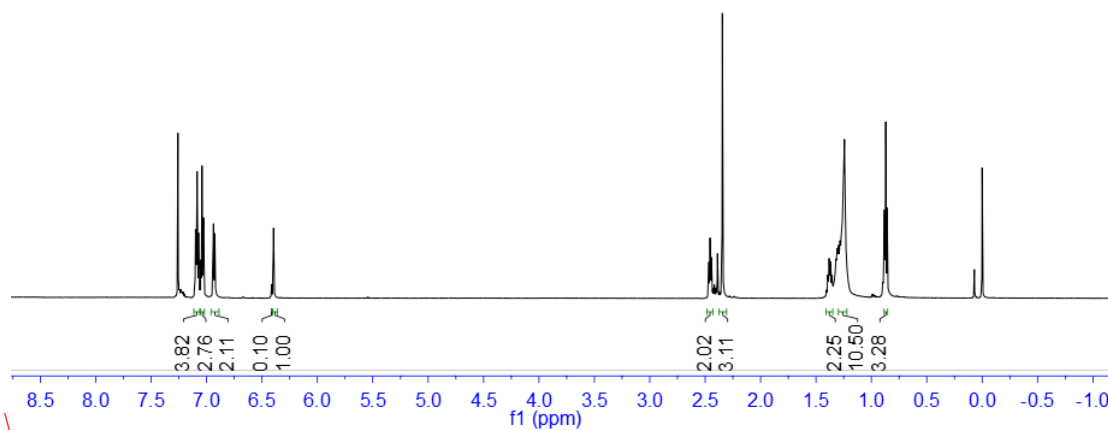

143.5554  
138.3442  
137.7642  
136.3241  
129.1410  
128.9417  
128.4036  
127.7534  
125.8978  
125.8217

77.2111  
76.9996  
76.7879

40.7574  
31.8622  
29.4138  
29.2780  
29.2110  
27.9678  
22.8496  
21.2140  
14.0802

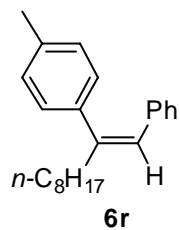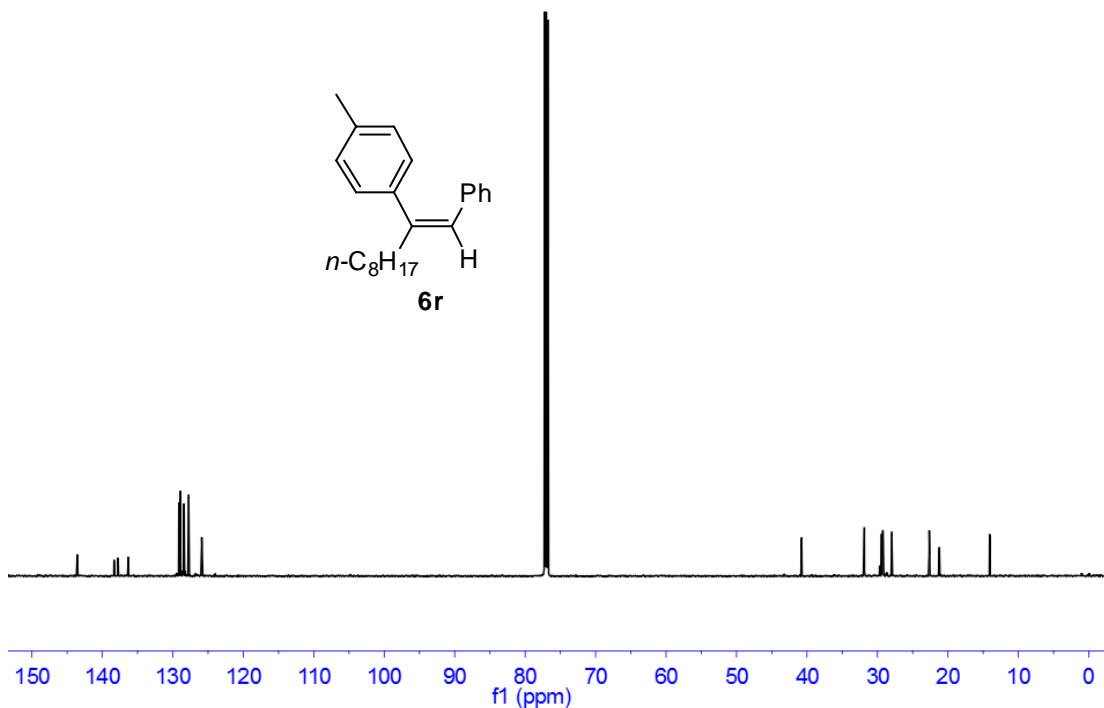

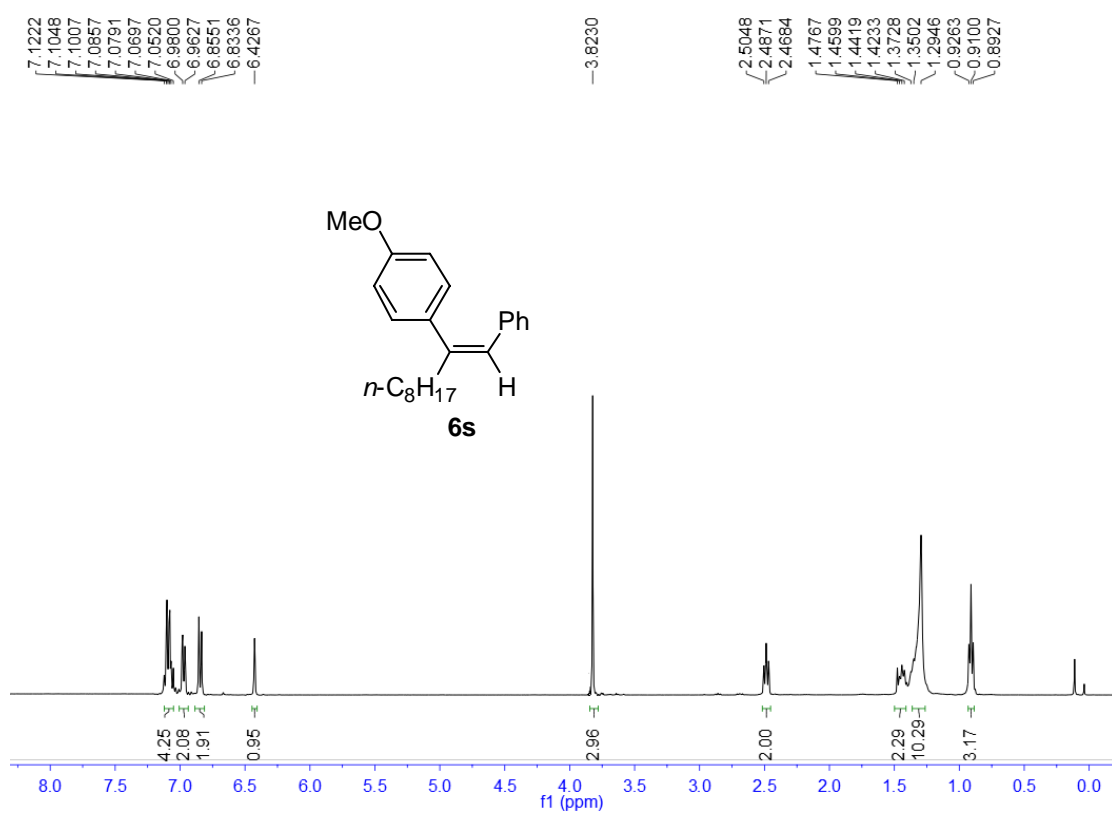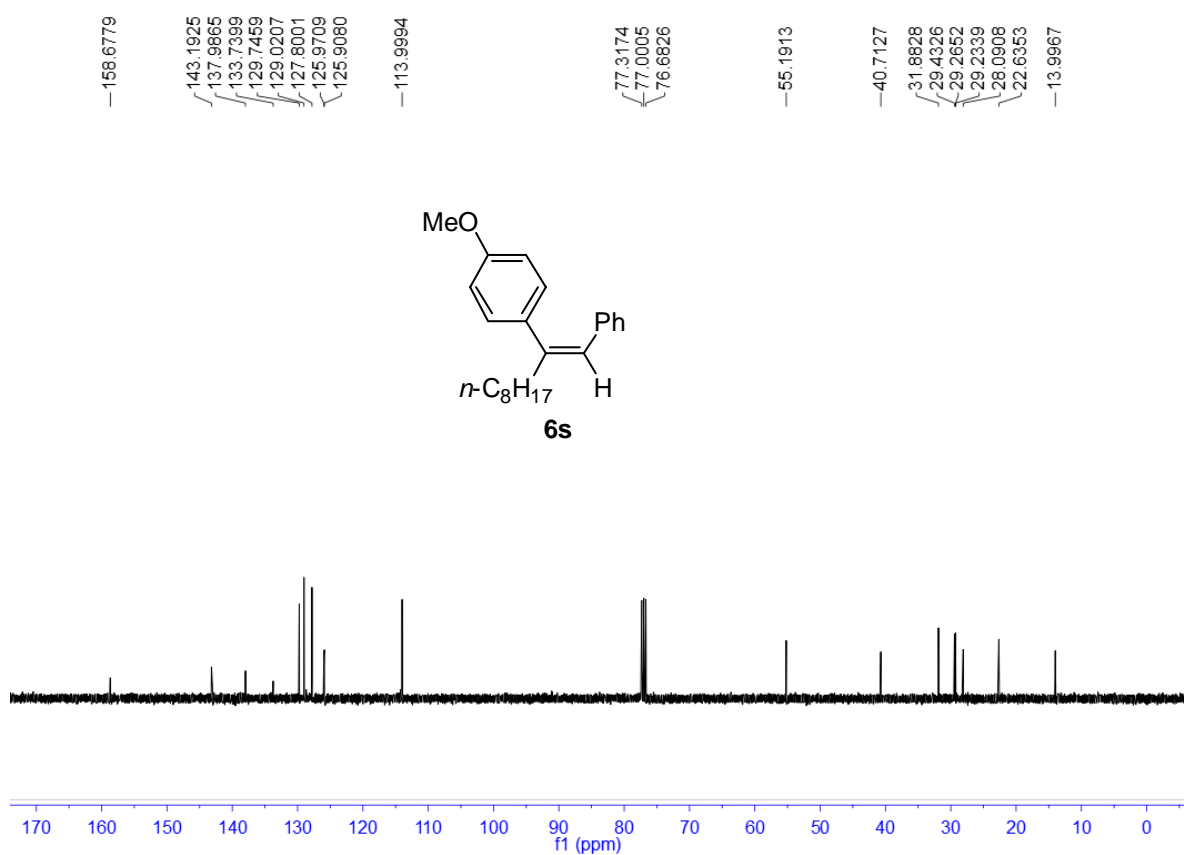

7.3510  
7.3381  
7.3256  
7.2884  
7.2743  
7.2619  
7.2372  
7.2251  
7.2129  
-6.4055  
5.9326  
5.9153  
5.9043  
5.8872  
5.1540  
5.1512  
5.1312  
5.1287  
5.1258  
5.1228  
5.1145  
5.1123

3.0174  
3.0073

2.2030  
2.1905  
2.1773

1.3460  
1.3327  
1.3228  
1.3125  
1.3057  
0.9238  
0.9120

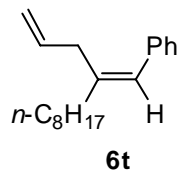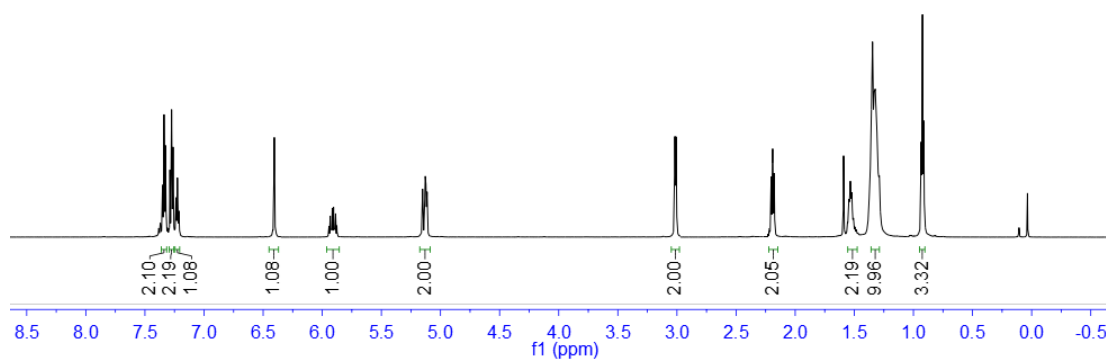

140.7492  
138.2420  
136.2985  
128.4784  
128.0472  
126.0341  
125.9837  
-115.8714

77.2116  
77.0000  
76.7884

37.1750  
35.3633  
31.8984  
29.5293  
29.4272  
29.3153  
27.9975  
22.6823  
-14.1269

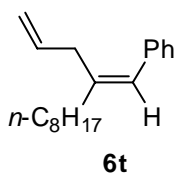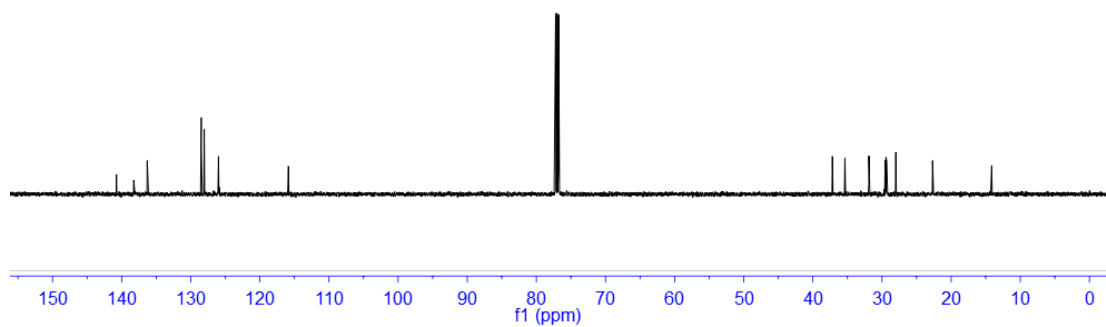



## Selected NOE and HMBC data

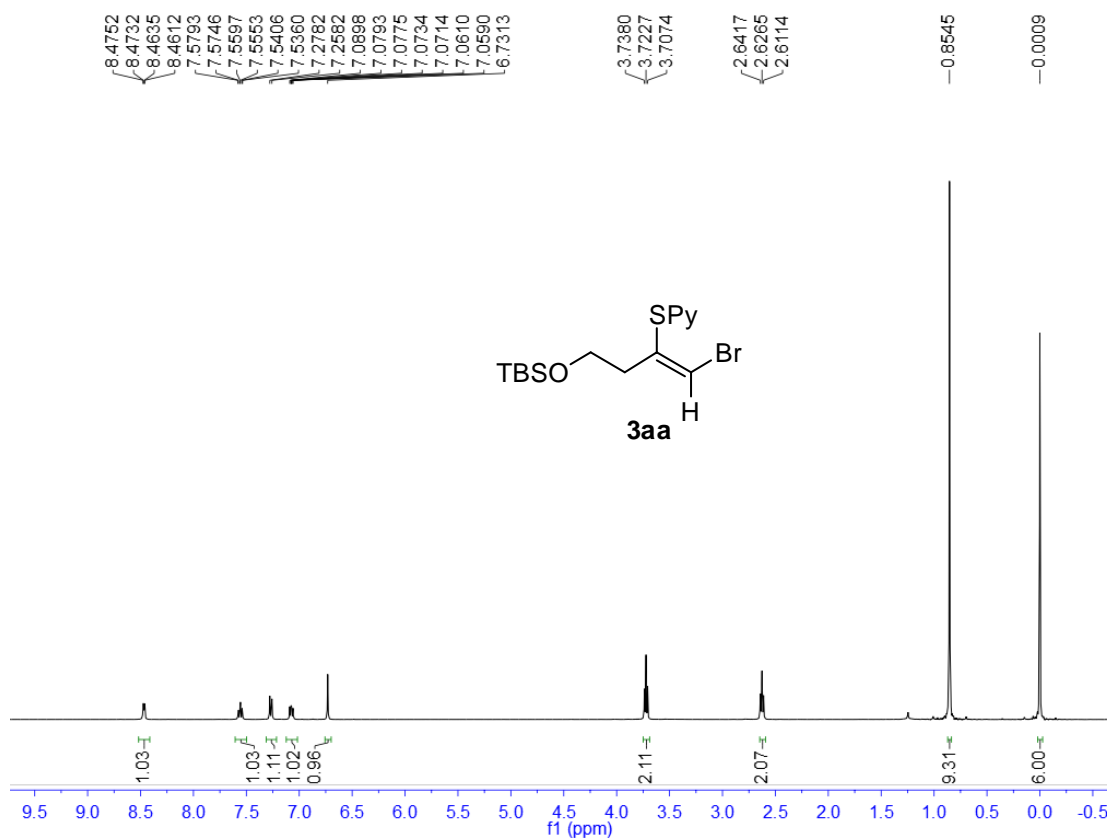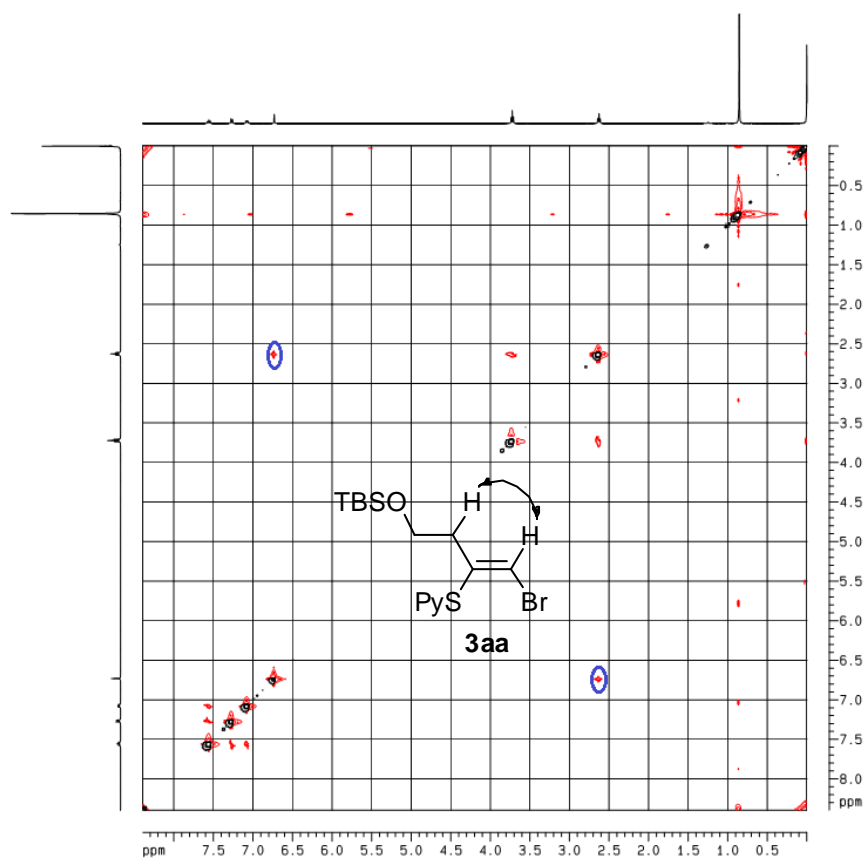

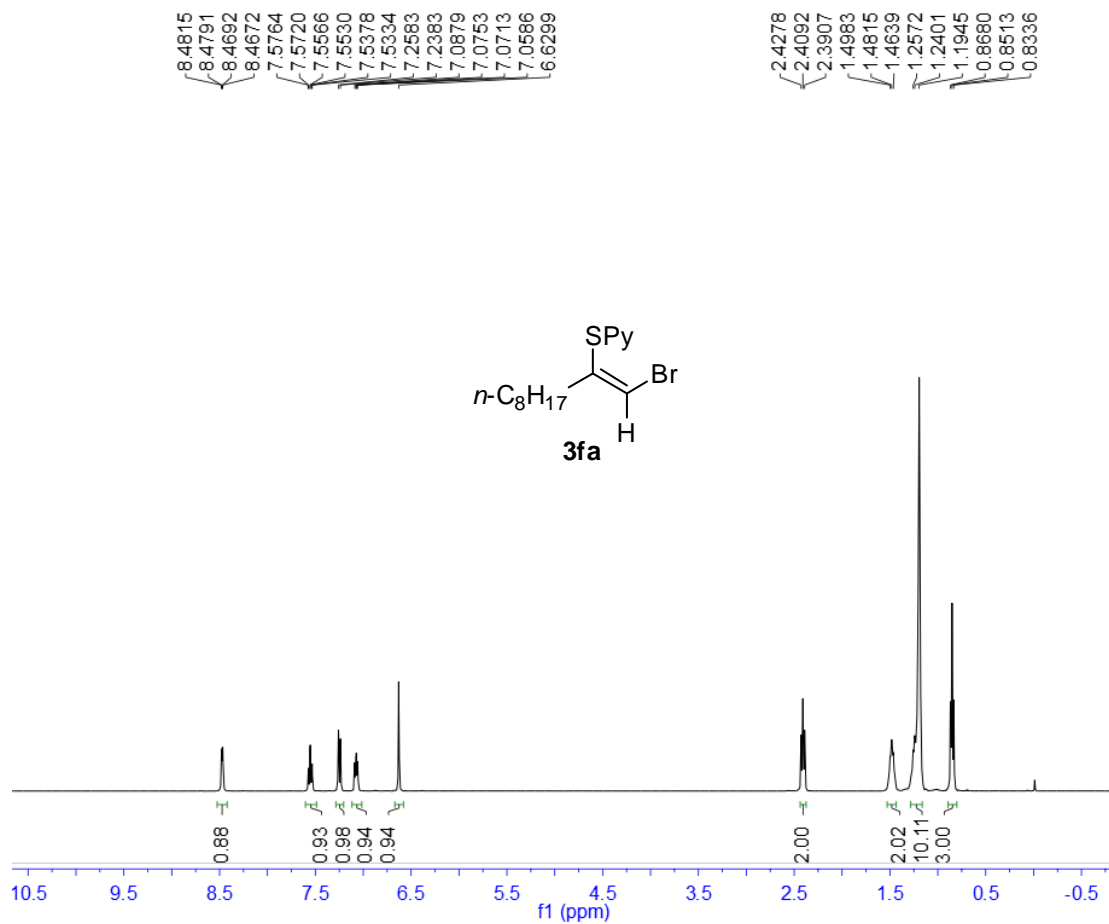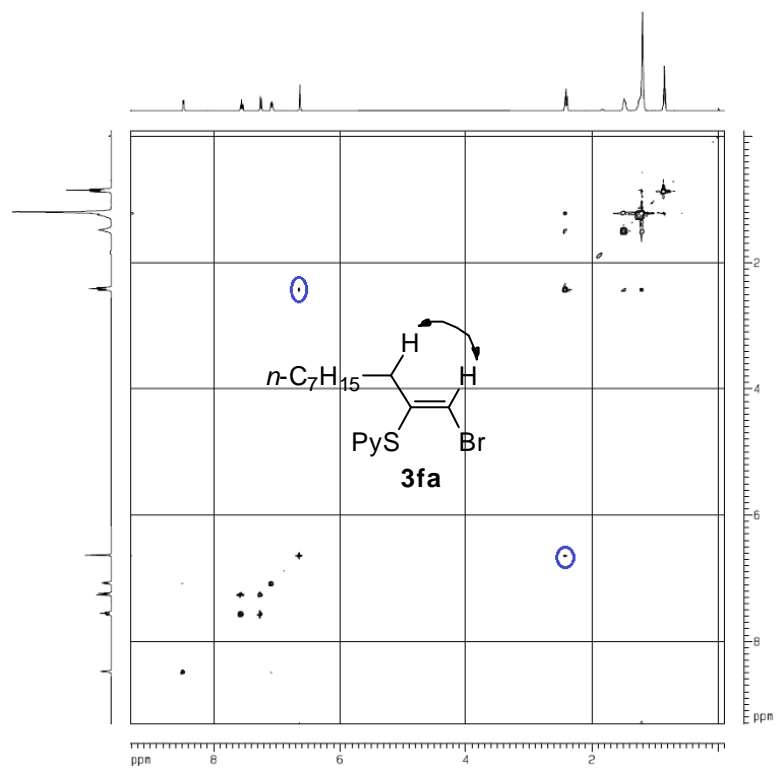

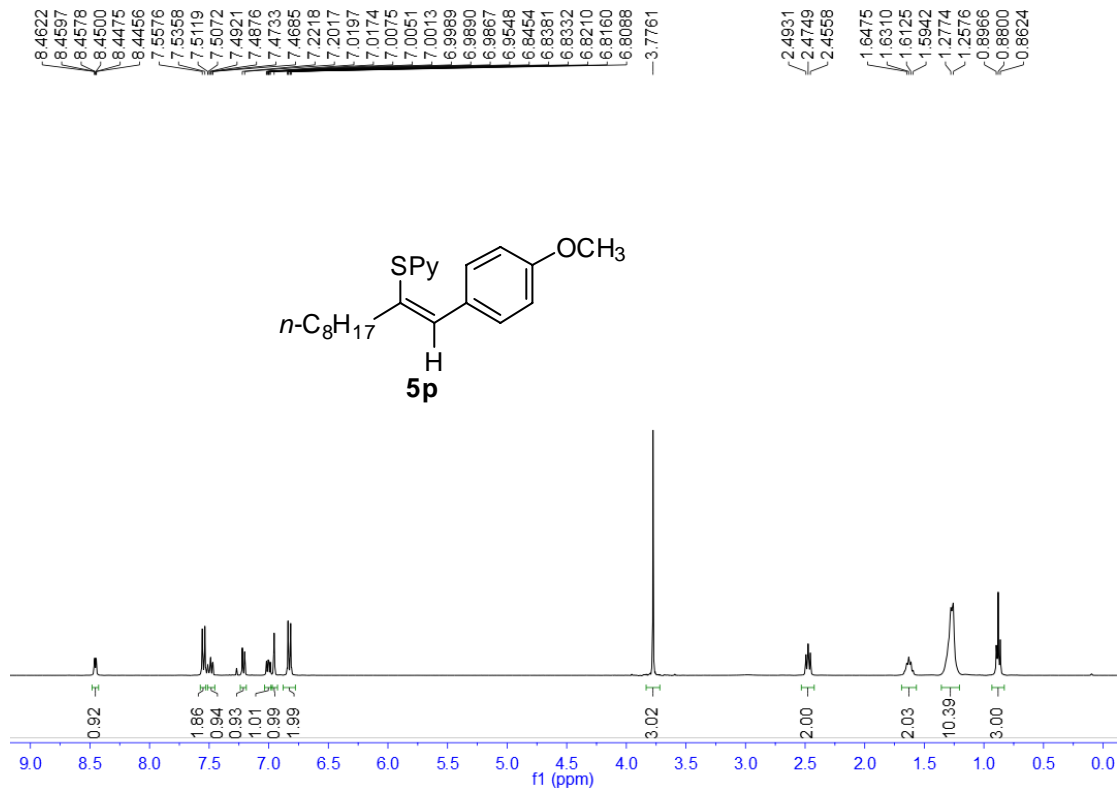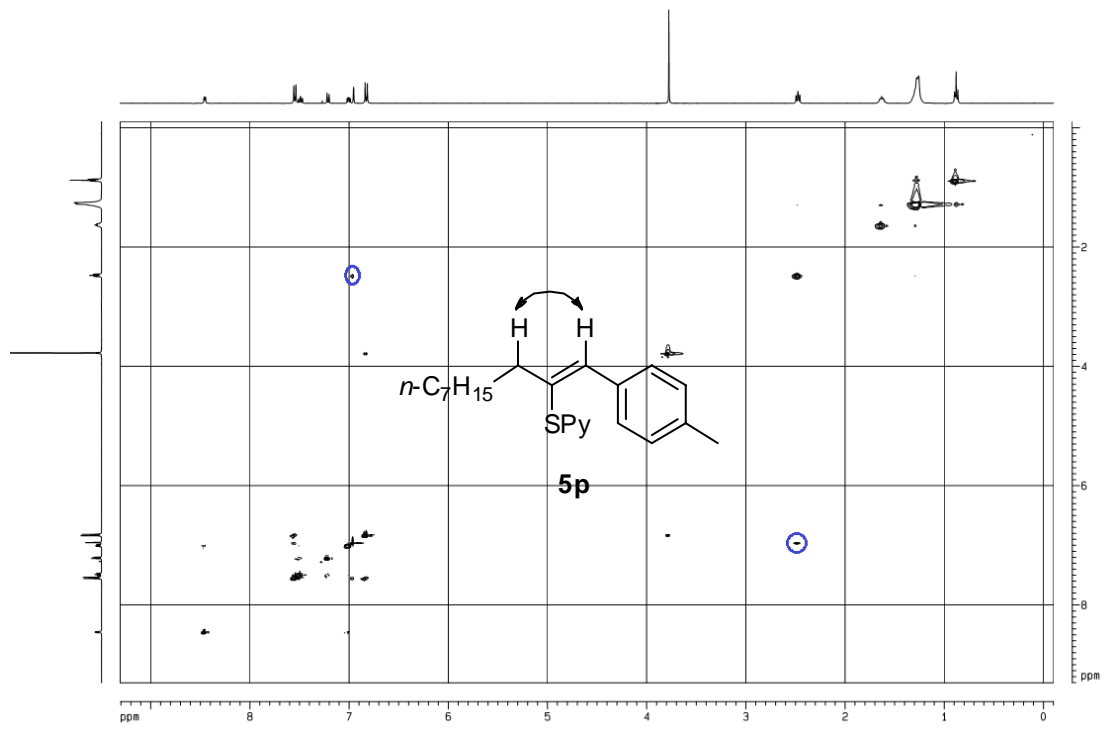

8.4942  
8.4926  
8.4914  
8.4862  
8.4845  
8.4834  
7.5447  
7.5345  
7.5320  
7.5320  
7.5189  
7.4428  
7.4301  
7.4093  
7.3833  
7.3317  
7.3192  
7.3062  
7.4093  
7.4008  
7.3833  
7.3317  
7.3192  
7.3062  
7.2531  
7.2408  
7.2089  
7.1954  
7.1954  
7.0384  
7.0359  
7.0359  
7.0344  
7.0275  
7.0262  
7.0262  
6.8008  
6.7833  
6.7266  
6.7005  
6.7005  
2.4786  
2.4660  
1.6407  
1.6295  
1.6173  
1.6173  
1.3234  
1.3121  
1.3023  
1.2916  
1.2860  
0.9242  
0.9127  
0.9008

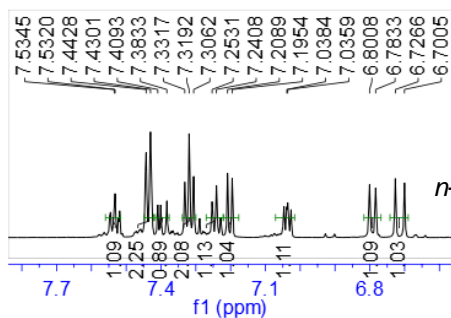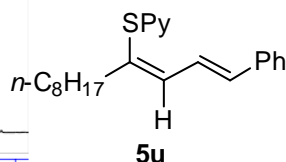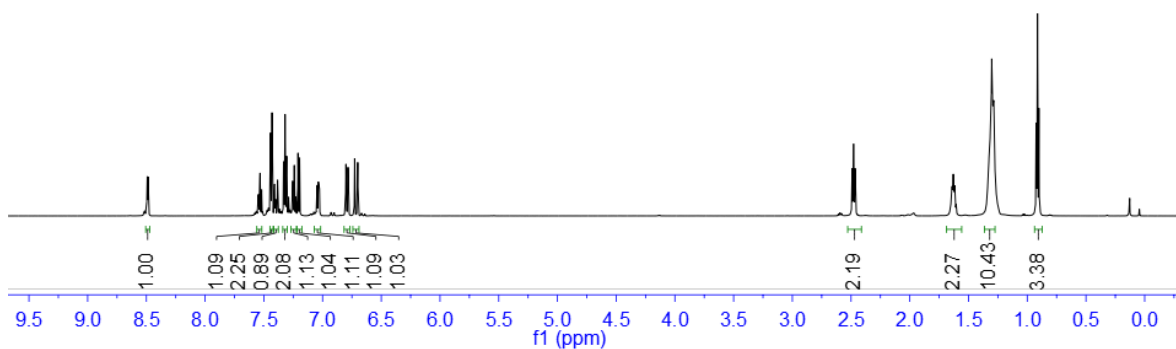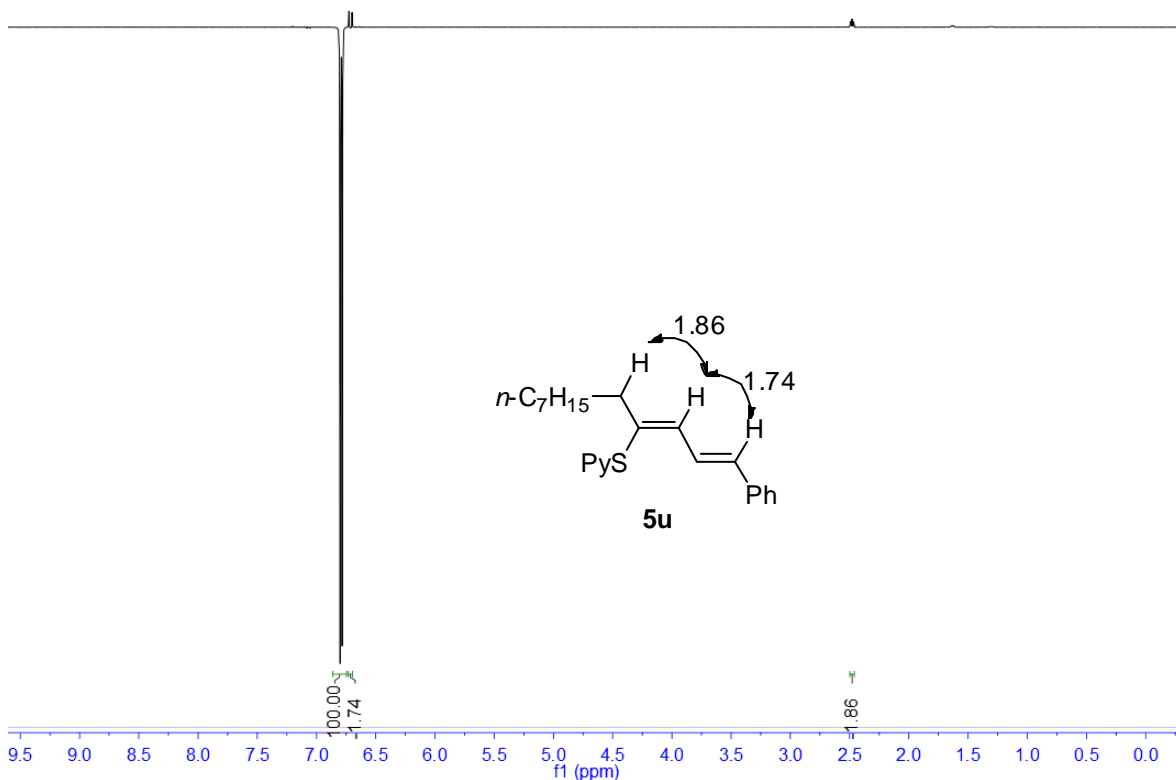

-159.4621  
 -149.8000  
 137.2177  
 137.0690  
 136.4915  
 134.4053  
 134.0554  
 128.5010  
 127.7550  
 126.5774  
 125.9012  
 121.9425  
 119.7887

77.3154  
 76.9997  
 76.6787

-38.8036  
 31.7746  
 29.3041  
 29.1363  
 28.9627  
 28.6843  
 22.5794  
 -14.0456

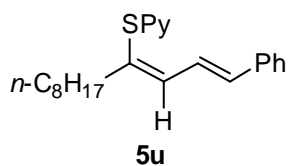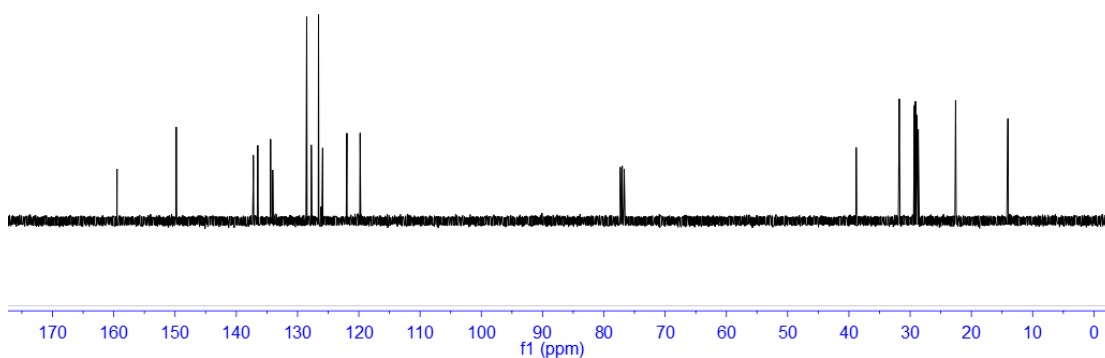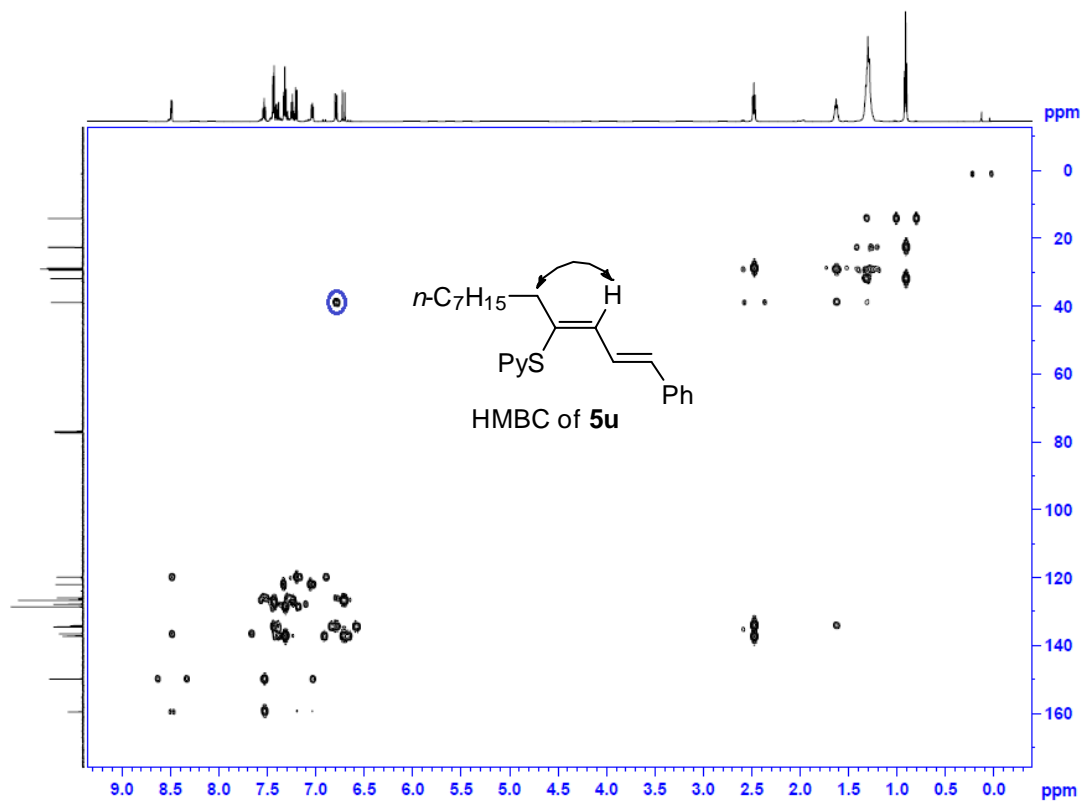

7.4055  
7.3926  
7.3797  
7.3667  
7.3144  
7.3023  
7.2882  
7.2794  
7.2668  
7.2650  
7.2526  
6.3487

2.9351  
2.9219  
2.9082  
2.5713  
2.5563  
2.5444  
1.9917  
1.9899

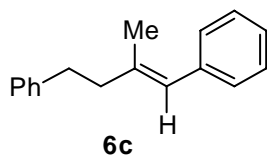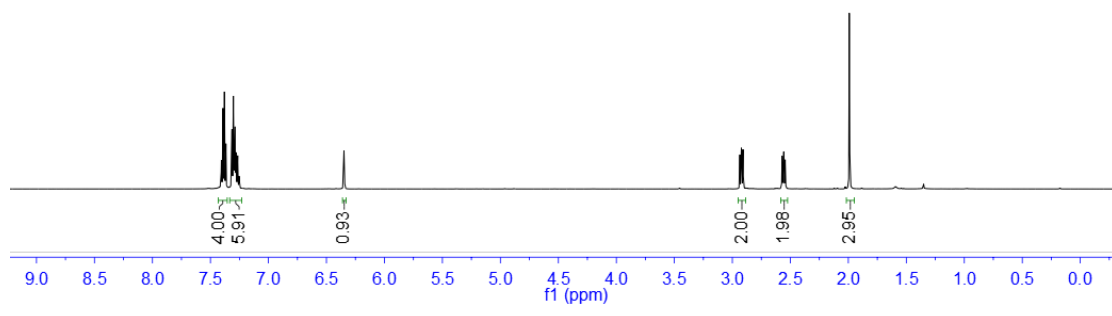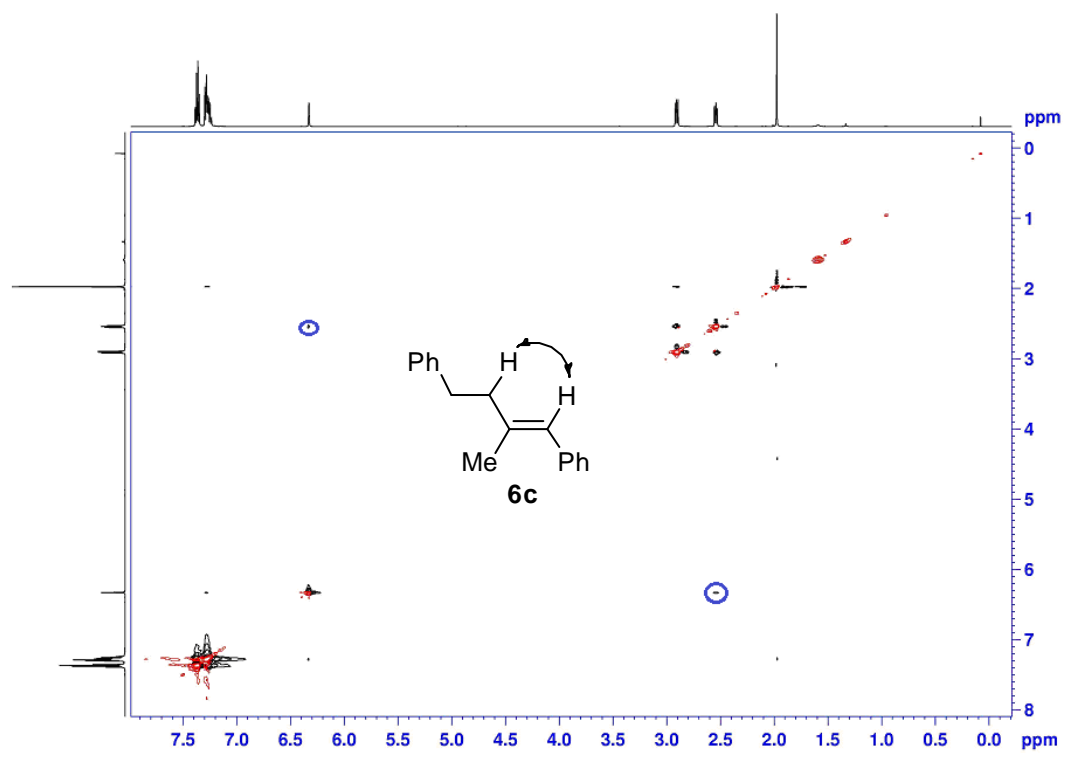

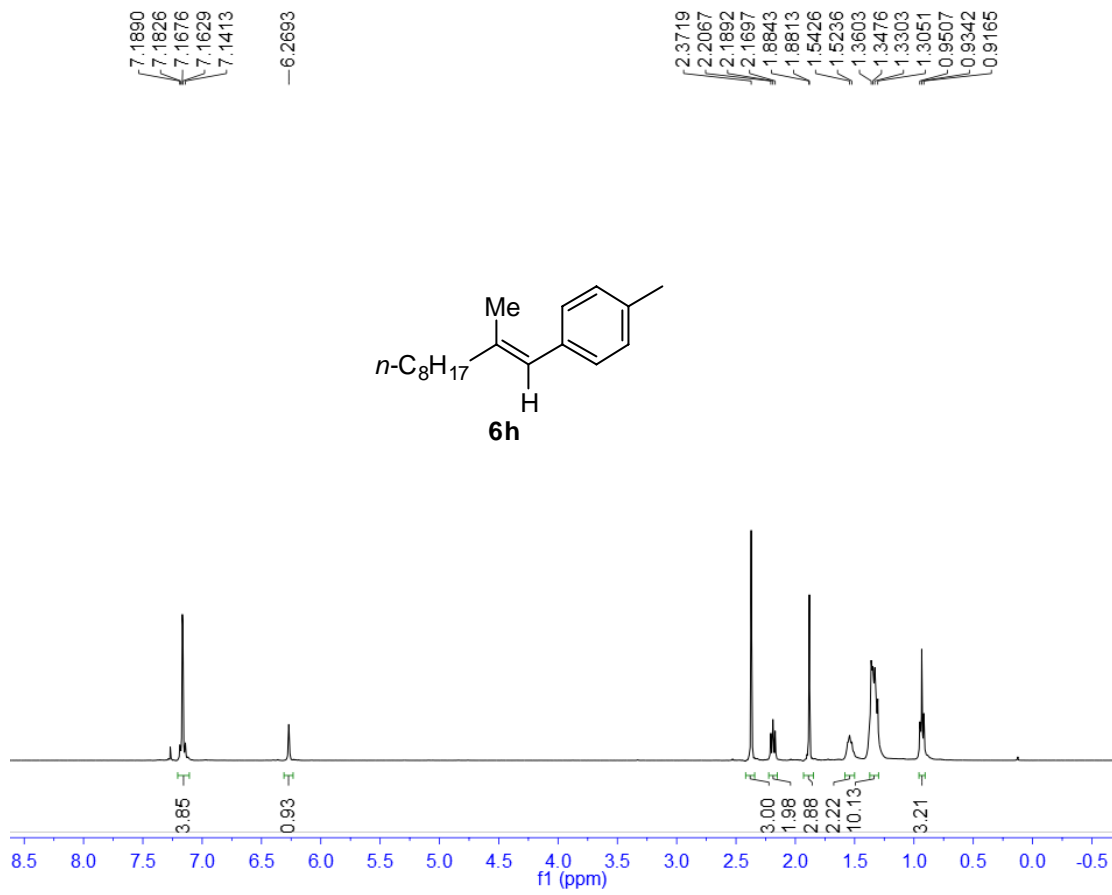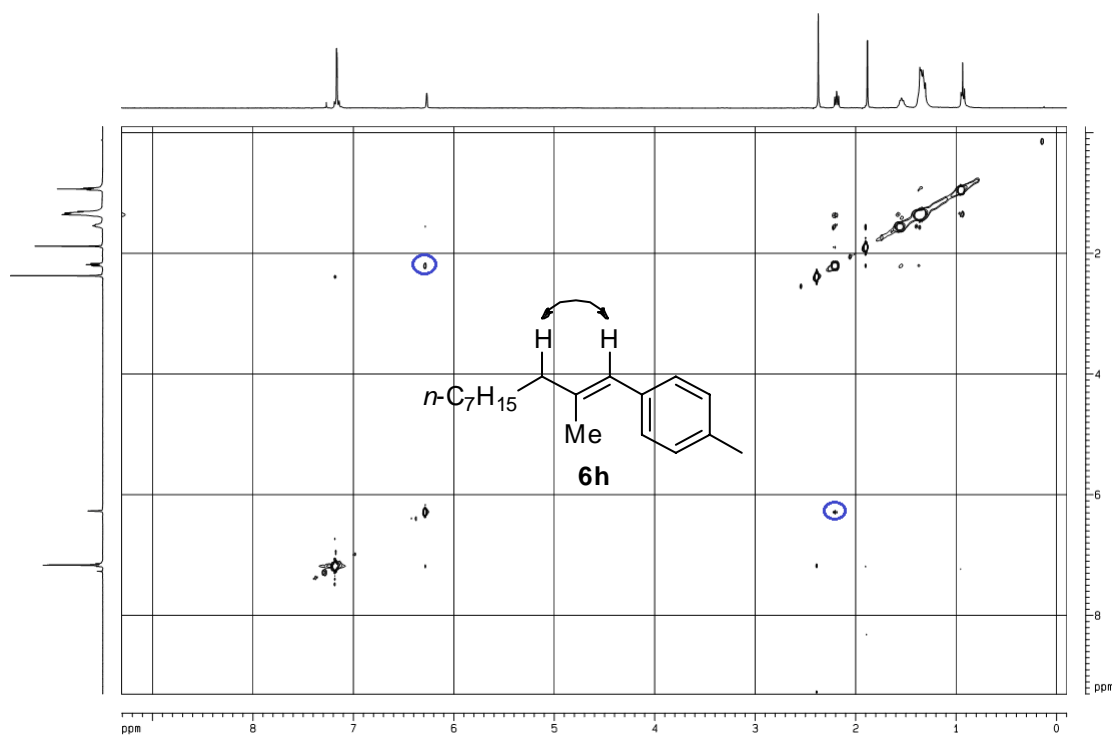

7.8751  
7.8709  
7.8522  
7.8315  
7.7525  
7.5183  
7.5138  
7.5040  
7.4993  
7.4951  
7.4844  
7.4810  
7.4749  
7.4709  
7.4537  
7.4500  
-6.4969

2.3117  
2.2929  
2.2742  
2.0113  
2.0086  
1.6326  
1.6145  
1.4219  
1.3892  
1.0076  
-0.9917  
-0.9742

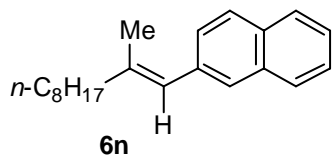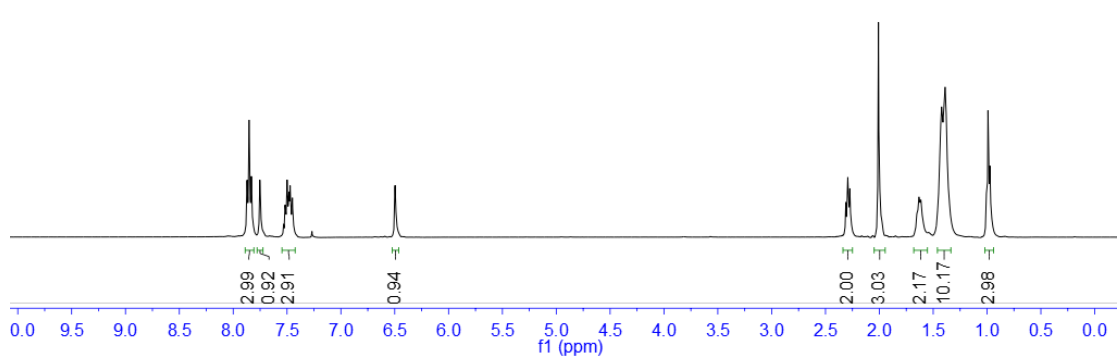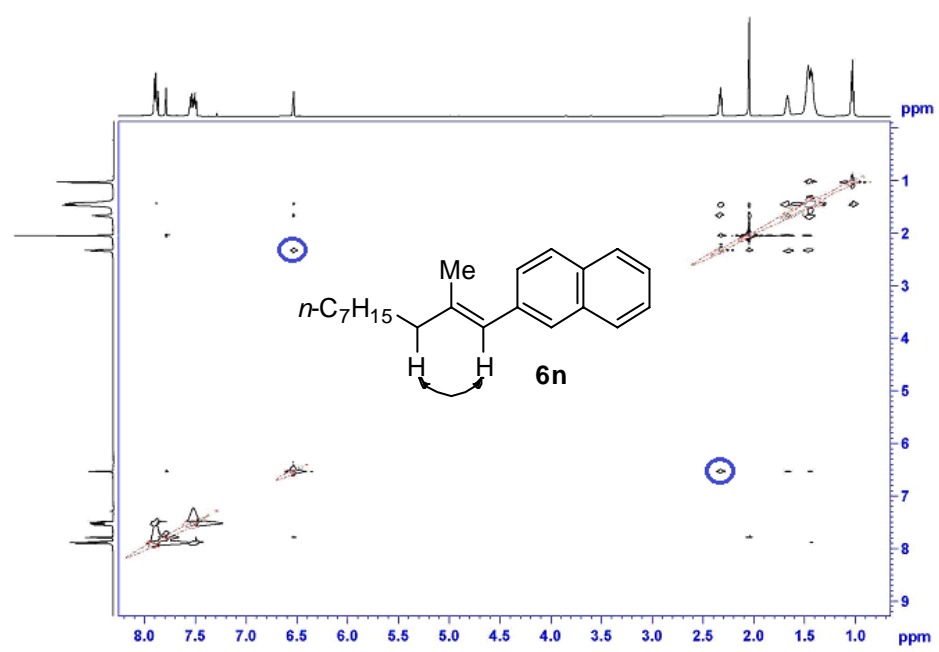



7.4471  
7.4281  
7.3540  
7.3353  
7.3157  
7.2395  
7.2212  
7.2029  
7.0924  
7.0660  
7.0536  
7.0263  
6.5056  
6.4667  
6.0655  
6.0382

2.1657  
2.1472  
2.1278  
1.8927  
1.5404  
1.5189  
1.5004  
1.4840  
1.3744  
1.3340  
1.2384  
0.9531  
0.9365  
0.9189

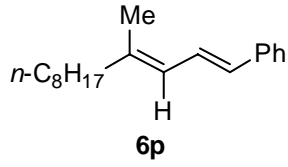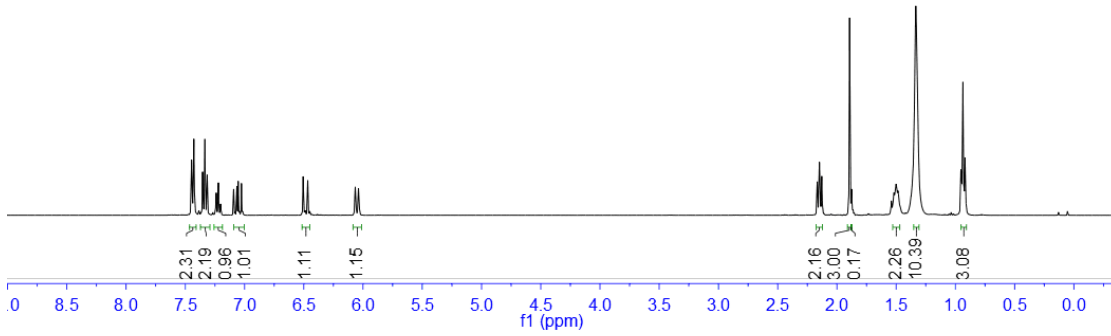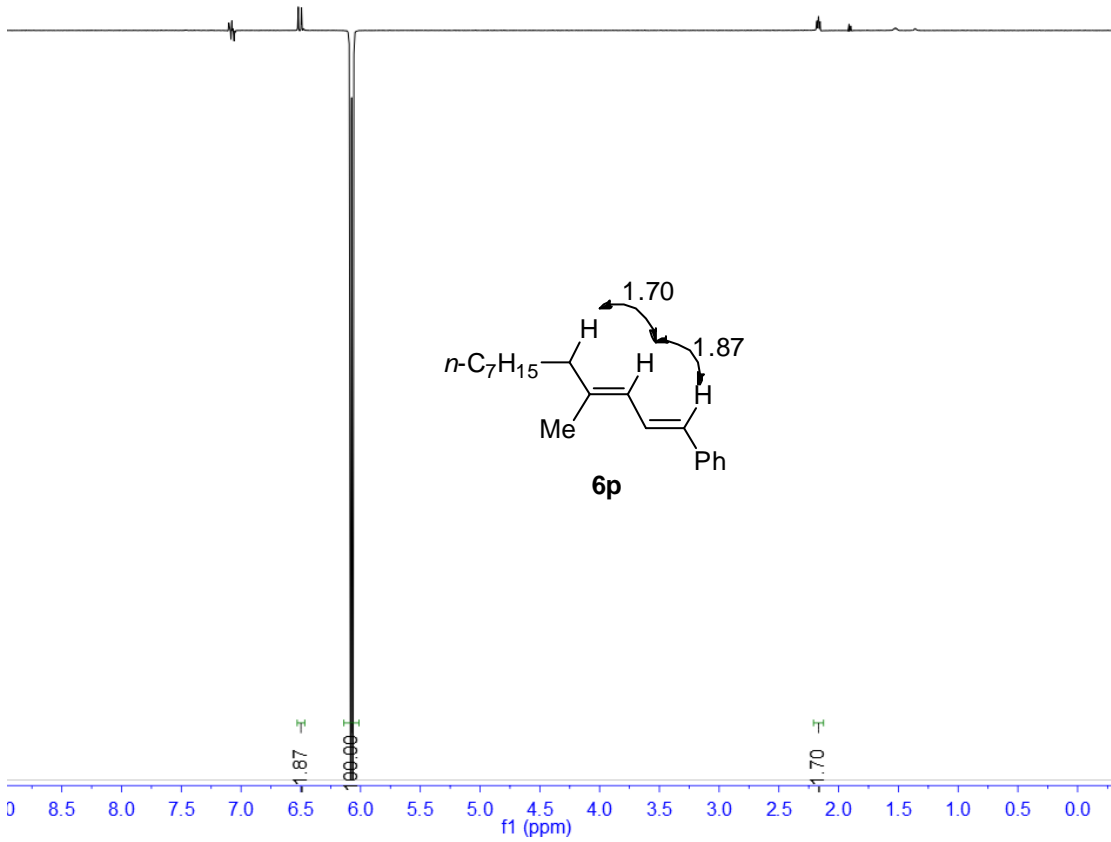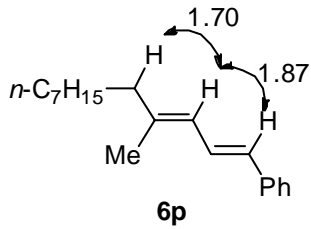

Supplement: c4ob00103f1.pdf [file c4ob00103f1.pdf]
